# Supplementary material
Source: MDPI journal article supplement (https://www.mdpi.com/2071-1050/10/6/1950)
Supplement: s1 [file s1]

**Supplementary Materials for the article:****A running start or a clean slate? How a history of cooperation affects the ability of cities to cooperate on environmental governance****Rui Mu<sup>1</sup>, \* and Wouter Spekkink<sup>2</sup>**

1 Dalian University of Technology, Faculty of Humanities and Social Sciences; ruimu@dlut.edu.cn

2 The University of Manchester, Sustainable Consumption Institute; wouter.spekkink@manchester.ac.uk

\* Correspondence: ruimu@dlut.edu.cn; Tel.: +86-139-0411-9150

**Appendix 1: Environmental Governance Actions in Beijing-Tianjin-Hebei Urban Agglomeration**

| Event time<br>(year-month-day)                   |    |    | Preorder<br>event no. | Event name and description                                                                            | Action<br>type | Actors involved                                                               | Event<br>no. |
|--------------------------------------------------|----|----|-----------------------|-------------------------------------------------------------------------------------------------------|----------------|-------------------------------------------------------------------------------|--------------|
| Part A: Joint actions at the agglomeration level |    |    |                       |                                                                                                       |                |                                                                               |              |
| 2013                                             | 9  | 17 |                       | Action plan for Beijing, Tianjin, Hebei and the surrounding areas to implement air pollution control  | FJA            | MOEP<br>NDRC<br>MOIIT<br>MOF<br>MOHURD<br>NEA                                 | R1           |
| 2013                                             | 10 | 23 | R1                    | Collaboration mechanism of air pollution control in Beijing, Tianjin, Hebei and the surrounding areas | FJA            | BG<br>TG<br>HP<br>MOEP<br>NDRC<br>MOIIT<br>MOF<br>MOHURD<br>CMA<br>NEA<br>MOT | R2           |
| 2013                                             | 10 | 23 | R2                    | Coordination office of air pollution control in Beijing, Tianjin, Hebei and the surrounding areas     | FJA            | BG<br>TG<br>HP                                                                | R3           |

|      |   |    |        |                                                                                                                                 |     |                                                              |    |
|------|---|----|--------|---------------------------------------------------------------------------------------------------------------------------------|-----|--------------------------------------------------------------|----|
|      |   |    |        |                                                                                                                                 |     | MOEP<br>NDRC<br>MOIIT<br>MOF<br>MOHURD<br>CMA<br>NEA<br>MOT  |    |
| 2014 | 1 | 9  | R1     | Clean Production Improvement Plan for Key Industrial Enterprises in Beijing, Tianjin, Hebei and the Surrounding Areas           | FJA | BG<br>TG<br>HP<br>MOIIT                                      | R4 |
| 2014 | 3 | 3  | R2, R3 | Regional air pollution joint prevention and control forum (the first meeting) was held by the Coordination Office.              | IJA | MOEP<br>BTHAPCLG<br>BEPA<br>TEPA<br>HEPA                     | R5 |
| 2014 | 3 | 25 | R3     | Coordination working unit was established for comprehensive atmospheric pollution control.                                      | FJA | BTHAPCLG<br>BEPA                                             | R6 |
| 2014 | 6 | 9  | R5     | 2014 key work points of atmospheric pollution joint prevention and control in Beijing, Tianjin, Hebei and the surrounding areas | FJA | BTHAPCLG                                                     | R7 |
| 2014 | 6 | 14 | R7     | An overall plan for ecological environment protection in Beijing, Tianjin, Hebei and the surrounding areas                      | FJA | MOEP<br>BG<br>TG<br>HP                                       | R8 |
| 2014 | 7 | 25 | R1     | Deadline correction plan of air pollution for key industry enterprises in Beijing, Tianjin, Hebei and the surrounding areas     | FJA | MOEP<br>BG<br>TG<br>HP<br>PetroChina<br>Sinopec<br>StateGrid | R9 |

|      |    |    |     |                                                                                                                                                          |     |                                                                                    |     |
|------|----|----|-----|----------------------------------------------------------------------------------------------------------------------------------------------------------|-----|------------------------------------------------------------------------------------|-----|
|      |    |    |     |                                                                                                                                                          |     | Huaneng<br>Datang<br>Huadian<br>Zongdiantou<br>Shenhua                             |     |
| 2014 | 7  | 31 | R5  | APEC air quality assurance meeting (second meeting) was held by the Coordination Office.                                                                 | IJA | SC<br>NDRC<br>MOIIT<br>MOF<br>MOEP<br>MOHURD<br>CMA<br>NEA<br>BEPA<br>TEPA<br>HEPA | R10 |
| 2014 | 7  | 31 | R8  | Beijing and Hebei signed the agreement of jointly speeding up the ecological environment construction in Zhangjiakou-Chengde region.                     | FJA | BG<br>HP                                                                           | R11 |
| 2014 | 8  | 7  | R8  | Beijing and Tianjin signed the agreement on further enhancing the cooperation of environment protection.                                                 | FJA | TG<br>BG                                                                           | R12 |
| 2014 | 9  | 4  | R10 | A training and experience-exchange meeting on regional motor vehicle pollutant emission control (the third meeting) was held by the Coordination Office. | IJA | HP<br>TG<br>BG                                                                     | R13 |
| 2014 | 10 | 21 | R8  | Joint prevention and control mechanism against water pollution crisis in Beijing-Tianjin-Hebei.                                                          | FJA | HP<br>TG<br>BG                                                                     | R14 |
| 2014 | 10 | 22 | R13 | A working draft for popularizing new energy automobile in public service field such as public transportation in Beijing-Tianjin-Hebei.                   | FJA | NDRC<br>MOF<br>MOIIT<br>MOEP<br>MOHURD                                             | R15 |

|      |    |    |     |                                                                                                                                                                                             |      |                                         |     |
|------|----|----|-----|---------------------------------------------------------------------------------------------------------------------------------------------------------------------------------------------|------|-----------------------------------------|-----|
|      |    |    |     |                                                                                                                                                                                             |      | MOST<br>NEA                             |     |
| 2014 | 11 | 25 | R14 | Cooperation agreement on joint prevention and control mechanism for water pollution crisis in Beijing-Tianjin-Hebei.                                                                        | FJA  | BG<br>TG<br>HP                          | R16 |
| 2015 | 4  | 30 |     | Outline of coordinated development plan in Beijing-Tianjin-Hebei.                                                                                                                           | FJA  | CPC Politburo<br>BG<br>TG<br>HP         | R17 |
| 2015 | 5  | 19 | R13 | The fourth meeting on air pollution control coordination mechanism in Beijing-Tianjin-Hebei and the surrounding area.                                                                       | IJA  | BTHAPCLG                                | R18 |
| 2015 | 5  | 26 | R18 | 2015 key work on air pollution joint prevention and control in Beijing-Tianjin-Hebei and the surrounding area.                                                                              | FJA  | BTHAPCLG                                | R19 |
| 2015 | 5  | 29 | R16 | Troubleshooting action for hidden danger in water pollution joint environment in Beijing-Tianjin-Hebei.                                                                                     | FJA  | BEPA<br>TEPA<br>HEPA                    | R20 |
| 2015 | 6  | 4  | R19 | Coordination office of motor vehicle emission control in Beijing, Tianjin, Hebei and the surrounding areas.                                                                                 | FJA  | BMVEMC<br>TMVEMC<br>HMVEMC              | R21 |
| 2015 | 6  | 4  | R21 | Beijing motor vehicle emission joint law enforcement office was officially inaugurated.                                                                                                     | FJA  | BEPA<br>BTMB                            | R22 |
| 2015 | 8  | 17 | R19 | Air pollution control coordination group special topic (70 anniversary activity in memory of the world anti-fascist war victory) meeting in Beijing-Tianjin-Hebei and the surrounding area. | IJA  | CPC Politburo<br>MOEP<br>BG<br>TG<br>HP | R23 |
| 2015 | 11 | 16 | R18 | The fifth meeting on air pollution control coordination mechanism in Beijing-Tianjin-Hebei and the surrounding area.                                                                        | LEDC | CPC Politburo<br>MOEP<br>BG<br>TG<br>HP | R24 |

|      |    |    |          |                                                                                                                                                                                                                                                                                                                                                                                                                                                                                                                                                                                                                                                                                                                                                                                                                                                     |     |                      |     |
|------|----|----|----------|-----------------------------------------------------------------------------------------------------------------------------------------------------------------------------------------------------------------------------------------------------------------------------------------------------------------------------------------------------------------------------------------------------------------------------------------------------------------------------------------------------------------------------------------------------------------------------------------------------------------------------------------------------------------------------------------------------------------------------------------------------------------------------------------------------------------------------------------------------|-----|----------------------|-----|
| 2015 | 11 | 27 | R24      | Environment law enforcement joint action working mechanism in Beijing-Tianjin-Hebei area.                                                                                                                                                                                                                                                                                                                                                                                                                                                                                                                                                                                                                                                                                                                                                           | FJA | BEPA<br>TEPA<br>HEPA | R25 |
| 2015 | 11 | 27 | R25      | Environment law enforcement joint action leading group office is established in Beijing-Tianjin-Hebei.                                                                                                                                                                                                                                                                                                                                                                                                                                                                                                                                                                                                                                                                                                                                              | FJA | BEPA<br>TEPA<br>HEPA | R26 |
| 2015 | 12 | 4  | R17      | A cooperation agreement for the breakthrough framework of environmental protection in Beijing-Tianjin-Hebei.                                                                                                                                                                                                                                                                                                                                                                                                                                                                                                                                                                                                                                                                                                                                        | FJA | BEPA<br>TEPA<br>HEPA | R27 |
| 2015 | 12 | 7  | R25, R26 | Beijing-Tianjin-Hebei area started the environment law enforcement joint action mechanism for the first time and thus the work of environment law enforcement joint action in Beijing-Tianjin-Hebei area was formally implemented.                                                                                                                                                                                                                                                                                                                                                                                                                                                                                                                                                                                                                  | FJA | BEPA<br>TEPA<br>HEPA | R28 |
| 2015 | 12 | 31 | R17      | Coordinated development plan for ecological environment protection in Beijing-Tianjin-Hebei.                                                                                                                                                                                                                                                                                                                                                                                                                                                                                                                                                                                                                                                                                                                                                        | FJA | NDRC                 | R29 |
| 2016 | 1  | 22 |          | The consultant group and overall expert group of air pollution control is formed in Beijing-Tianjin-Hebei, and regional air pollution control joint research rules are formulated.                                                                                                                                                                                                                                                                                                                                                                                                                                                                                                                                                                                                                                                                  | FJA | BTHAPCLG             | R30 |
| 2016 | 2  | 19 | R16      | In order to further prevent the trans-Beijing-Tianjin-Hebei area Fenghexizhi, Longhe water pollution conflict and crisis event of water pollution, effectively prevent and treat the trans-Beijing-Tianjin-Hebei area basin crisis event of water pollution and guarantee the water quality safety inside the region, therefore, Beijing municipal bureau of environment protection, Tianjin municipal bureau of environment protection, Hebei provincial department of environment protection, under the guidance of Beijing-Tianjin-Hebei regional coordinated development, jointly signed the trans-Beijing-Tianjin-Hebei area Fenghexizhi, Longhe environment pollution joint treatment agreement, and thus officially set up the joint law enforcement mechanism for the trans-Beijing-Tianjin-Hebei area Fenghexizhi, Longhe water pollution. | FJA | BEPA<br>TEPA<br>HEPA | R31 |
| 2016 | 2  | 24 | R30      | The first meeting of the consultant group and overall expert group for air pollution control joint research in Beijing-Tianjin-Hebei.                                                                                                                                                                                                                                                                                                                                                                                                                                                                                                                                                                                                                                                                                                               | IJA | BTHAPCLG             | R32 |

|      |    |    |               |                                                                                                                             |     |                                                |     |
|------|----|----|---------------|-----------------------------------------------------------------------------------------------------------------------------|-----|------------------------------------------------|-----|
| 2016 | 4  | 11 | R29, R30, R32 | Air quality forecast information sharing mechanism.                                                                         | FJA | BEPA<br>TEPA<br>HEPA                           | R33 |
| 2016 | 5  | 24 | R24           | The sixth meeting of air pollution control coordination group meeting in Beijing-Tianjin-Hebei and the surrounding area.    | IJA | CPC Politburo<br>SC<br>BTHAPCLG                | R34 |
| 2016 | 6  | 14 | R28           | Joint investigation work hidden environmental danger in Beijing-Tianjin-Hebei.                                              | FJA | BEPA<br>TEPA<br>HEPA                           | R35 |
| 2016 | 6  | 20 | R34           | Strengthened measures for air pollution control in Beijing-Tianjin-Hebei (2016-2017)                                        | FJA | MOEP<br>BG<br>TG<br>HP                         | R36 |
| 2016 | 6  | 21 | R28           | Joint meeting for environment joint action law enforcement in Beijing-Tianjin-Hebei.                                        | IJA | BEPA<br>TEPA<br>HEPA                           | R37 |
| 2016 | 10 | 7  | R34           | Limit standard for volatile organic compound concentration of adhesive agent and construction coating                       | FJA | BEPA<br>TEPA<br>HEPA                           | R38 |
| 2016 | 10 | 20 | R34           | The seventh meeting of air pollution control coordination group is held in Beijing-Tianjin-Hebei and the surrounding areas. | IJA | CPC Politburo<br>BG<br>MOEP<br>HP<br>NEA<br>TG | R39 |
| 2016 | 12 | 2  | R27, R38      | Regional cooperation mechanism for environment protection standards.                                                        | FJA | BEPA<br>TEPA<br>HEPA<br>BQSB<br>TQSB<br>HQSB   | R40 |

| Part B: Autonomous actions in Beijing |    |    |    |                                                                                                                                                                                                                                                                                                                                                                                                                                                                                                                                        |     |                        |    |
|---------------------------------------|----|----|----|----------------------------------------------------------------------------------------------------------------------------------------------------------------------------------------------------------------------------------------------------------------------------------------------------------------------------------------------------------------------------------------------------------------------------------------------------------------------------------------------------------------------------------------|-----|------------------------|----|
| 2000                                  | 12 | 8  |    | Method of Beijing to implement "China Air Pollution Control Law" was approved on the 23th-session of Beijing municipal 11th standing committee of national people's congress.                                                                                                                                                                                                                                                                                                                                                          | LPA | BPC                    | B1 |
| 2001                                  |    | 3  | B1 | Acceptance technical specification for the continuous monitoring and observing system for the gas emission from fixed pollution source.                                                                                                                                                                                                                                                                                                                                                                                                | LPA | BEPA                   | B2 |
| 2002                                  | 5  | 15 |    | Method of Beijing to implement "China Water Pollution Control Law" was approved on the 34th-session of Beijing municipal 11th standing committee of national people's congress.                                                                                                                                                                                                                                                                                                                                                        | LPA | BPC                    | B3 |
| 2004                                  | 7  | 6  | B3 | A notice by Beijing bureau of environment protection on the installation of continuous and automatic monitoring and observing water quality and quantity equipment for urban sewage treatment plant.                                                                                                                                                                                                                                                                                                                                   | LPA | BEPA<br>BEMC           | B4 |
| 2005                                  | 3  | 31 | B1 | 11th-period measures for air pollution control in Beijing.                                                                                                                                                                                                                                                                                                                                                                                                                                                                             | LPA | BG                     | B5 |
| 2005                                  | 5  | 19 | B5 | Special environmental inspection was carried out for the environment protection measure and construction vehicle exhaust gas emission for Maliandao residence community of Xuanwu district and reconstruction worksite of the reconstruction project of Qingqi west plant area.                                                                                                                                                                                                                                                        | MEA | BEPA<br>BUMLEB<br>BTMB | B6 |
| 2005                                  | 5  | 20 | B5 | Three key industrial pollution resources (Shougang group, Jingneng thermal power plant, Gaojing thermal power plant) in Shijingshan region were inspected.                                                                                                                                                                                                                                                                                                                                                                             | MEA | BEPA                   | B7 |
| 2005                                  | 9  | 15 | B2 | An acceptance check was carried out for sulfur dioxide monitoring and observing for the on-line monitoring and observing instrument of installed boilers in Beijing.<br>The measured data may be taken as basis for later environment management. Those units which failed to reach standard would be punished in accordance with their tonnage of boiler, degree of exceeding standard and number of times of exceeding standard according to law. A notice of carrying out deadline correction would be sent to them simultaneously. | MEA | BEPA<br>BEMC           | B8 |
| 2006                                  | 3  | 16 | B5 | 12th-period measures for air pollution control in Beijing.                                                                                                                                                                                                                                                                                                                                                                                                                                                                             | LPA | BG                     | B9 |

|      |    |    |     |                                                                                                                                                                                                                                                                                                                                                                          |     |                        |     |
|------|----|----|-----|--------------------------------------------------------------------------------------------------------------------------------------------------------------------------------------------------------------------------------------------------------------------------------------------------------------------------------------------------------------------------|-----|------------------------|-----|
| 2006 | 3  | 31 | B9  | From this year on, the environment protection bureau, transportation bureau and urban management bureau will jointly carry out inspections overnight running vehicles.                                                                                                                                                                                                   | MEA | BEPA<br>BUMLEB<br>BTMB | B10 |
| 2006 | 10 | 8  | B9  | Environmental inspection of exhaust gas emission of motor vehicle in Beijing. Aim of this work is to implement the 12th-period measures for air pollution control in Beijing, by effectively controlling the emission pollution of motor vehicle and ensuring the completion of the target of air quality of the whole year.                                             | MEA | BEPA<br>BUMLEB<br>BTMB | B11 |
| 2007 | 3  | 18 | B1  | Regulations on automatic monitoring and observing equipment of atmospheric pollution source in Beijing.                                                                                                                                                                                                                                                                  | LPA | BEPA                   | B12 |
| 2007 | 3  | 31 | B9  | The 13th-period measures for air pollution control in Beijing.                                                                                                                                                                                                                                                                                                           | LPA | BG                     | B13 |
| 2008 | 3  | 16 | B13 | The 14th-period measures for air pollution control in Beijing.                                                                                                                                                                                                                                                                                                           | LPA | BG                     | B14 |
| 2009 | 2  | 10 | B14 | The 15th-period measures for air pollution control in Beijing.                                                                                                                                                                                                                                                                                                           | LPA | BG                     | B15 |
| 2009 | 2  | 21 |     | Temporary method for the environment information disclosure.                                                                                                                                                                                                                                                                                                             | LPA | BEPA                   | B16 |
| 2009 | 6  | 26 | B15 | Departments of environment, urban management, agriculture and etc. carried out joint inspection actions on prohibition of stalks burning.                                                                                                                                                                                                                                | MEA | BEPA<br>BUMLEB<br>BAB  | B17 |
| 2009 | 9  | 15 | B15 | Beijing municipality organized an atmospheric pollution special treatment action for one month in the city so as to enhance the atmospheric pollution source monitoring and control to further improve air quality.                                                                                                                                                      | MEA | BEPA                   | B18 |
| 2009 | 10 | 26 | B3  | Beijing carried out inspection over water pollution enterprises to stimulate the enterprises to actively treat their existed pollution resource, solve the water environment problems which attracted the public attention, complete the target of total amount of pollutant emission, and ensure the sustained improvement of the water environment quality of Beijing. | MEA | BEPA                   | B19 |
| 2009 | 10 | 30 |     | Method of environmental monitor and oversight in Beijing.                                                                                                                                                                                                                                                                                                                | LPA | BEPA                   | B20 |
| 2009 | 11 | 1  | B20 | Method of capacity affirmation for the social environmental monitor and oversight organizations.                                                                                                                                                                                                                                                                         | LPA | BEPA                   | B21 |
| 2010 | 4  | 22 | B15 | The 16th-period measures for air pollution control in Beijing.                                                                                                                                                                                                                                                                                                           | LPA | BG                     | B22 |
| 2010 | 9  | 7  | B22 | Beijing carried out the second stage environmental enforcement action which mainly aims at the guarantee of air quality attainment.                                                                                                                                                                                                                                      | MEA | BEPA                   | B23 |

|      |    |    |               |                                                                                                                                                                                         |     |                             |     |
|------|----|----|---------------|-----------------------------------------------------------------------------------------------------------------------------------------------------------------------------------------|-----|-----------------------------|-----|
| 2010 | 11 | 19 | B3            | Regulations on water pollution control in Beijing.                                                                                                                                      | LPA | BPC                         | B24 |
| 2011 | 4  | 1  | B1            | Beijing clean air action plan (2011-2015 atmospheric pollution control measures).                                                                                                       | LPA | BG                          | B25 |
| 2011 | 11 | 15 |               | Beijing working draft on total amount reduction of major pollutants emission in the period of 12th five-year plan.                                                                      | LPA | BG                          | B26 |
| 2012 | 1  | 12 |               | Recommendations by Beijing municipal government on the implementation of the key work points of enhancing environment protection nu the State Council.                                  | LPA | BG                          | B27 |
| 2012 | 3  | 21 | B25, B26, B27 | 2012-2020 air pollution governance measures in Beijing.                                                                                                                                 | LPA | BG                          | B28 |
| 2013 | 3  | 15 | B25           | 2013 Work Measures for Key Tasks of 2013-2017 Clean Air Action Plan in Beijing.                                                                                                         | LPA | BG                          | B29 |
| 2013 | 4  | 27 | B16           | Notice about Disclosing Self-Monitoring Results of the National Key Monitoring Enterprises by Beijing Environmental Protection Bureau.                                                  | LPA | BG                          | B30 |
| 2013 | 5  | 7  | B25, B26, B27 | Statistical Method of Total Amount Reduction on Pollutants of the Twelfth Five-Year Plan in Beijing.                                                                                    | LPA | BEPA<br>BSB<br>BDRC<br>BQSB | B31 |
| 2013 | 5  | 7  | B26, B27, B28 | Monitoring Method of Total Amount Reduction on Pollutants of the Twelfth Five-Year Plan in Beijing.                                                                                     | LPA | BEPA<br>BSB<br>BDRC<br>BQSB | B32 |
| 2013 | 8  | 23 | B16           | Notice on Incorporating Corporate Environmental Illegal Information into Foundation Database of Credit Information of Enterprise in People's Bank of China.                             | LPA | BEPA<br>PBC<br>CBRC         | B33 |
| 2013 | 8  | 28 | B16           | Notice on Relevant Documents Issued by Ministry of Environment Protection about Opening of Environmental Information Forwarded by Beijing Municipal Bureau of Environmental Protection. | LPA | BEPA                        | B34 |
| 2013 | 9  | 11 | B25           | Clean Air Action Plan in Beijing 2013-2017.                                                                                                                                             | LPA | BG                          | B35 |

|      |    |    |          |                                                                                                                                                                                                                                                                                                                         |     |               |     |
|------|----|----|----------|-------------------------------------------------------------------------------------------------------------------------------------------------------------------------------------------------------------------------------------------------------------------------------------------------------------------------|-----|---------------|-----|
| 2013 | 9  | 12 | B35      | Notice of Printing and Distributing Decomposition of Key Task in Action Plan for Cleaning Air in Beijing from 2013 to 2017 by People's Government of Beijing Municipality.                                                                                                                                              | LPA | BG            | B36 |
| 2013 | 10 | 27 | B35      | Contingency Plan for Air Heavy Pollution in Beijing (trial implementation).                                                                                                                                                                                                                                             | LPA | BG            | B37 |
| 2013 | 11 | 5  | B36      | Special Inspection Action for Cooking Oil Fume in Beijing.                                                                                                                                                                                                                                                              | MEA | BEPA          | B38 |
| 2013 | 11 | 13 | B36      | Daily Inspection and Special Enforcement Inspection of Beijing Automobile Repair Enterprises.                                                                                                                                                                                                                           | MEA | BEPA          | B39 |
| 2013 | 11 | 18 | B36      | Daily inspection and specialized law enforcement inspection of Beijing printing enterprises.                                                                                                                                                                                                                            | MEA | BEPA          | B40 |
| 2013 | 11 | 29 | B16      | Notice of "Directory for Government Information Disclosure of Environmental Impact Assessment on Construction Project (trial implementation) issued by General Office of the Ministry of Environmental Protection of the People's Republic of China" forwarded by Beijing Municipal Bureau of Environmental Protection. | LPA | BEPA          | B41 |
| 2013 | 12 | 13 | B35      | Pollution Charge Standard Adjustment for 4 Major Pollutants of "More Emissions and More Burden" in Beijing.                                                                                                                                                                                                             | MEA | BEPA          | B42 |
| 2014 | 1  | 22 | B1, R1   | Regulations on the Prevention and Control of Air Pollution in Beijing.                                                                                                                                                                                                                                                  | LPA | BPC           | B43 |
| 2014 | 2  | 14 | B35      | 2014 Working Measures for Key Tasks of Clean Air Action Plan in Beijing 2013-2017.                                                                                                                                                                                                                                      | LPA |               | B44 |
| 2014 | 2  | 21 | B43, B44 | Beijing Environmental Protection Supervision Corp dispatched 10 groups of law-enforcement personnel for environmental supervision and inspection to Fangshan, Daxing, Tongzhou, Shunyi, Miyun, Huairou, Changping, Chaoyang, and Fengtai.                                                                               | MEA | BEPSC         | B45 |
| 2014 | 2  | 22 | B37      | An instruction shall be issued in Beijing Heavy Pollution Emergency Headquarters, and the alarm level of air heavy pollution shall be changed from yellow to orange.                                                                                                                                                    | MEA | BG            | B46 |
| 2014 | 3  | 1  | B43, B44 | Atmosphere regulations shall be implemented to "zero action" to Beijing Environmental Protection System to crack down on polluting atmospheric violations.                                                                                                                                                              | MEA | BEPA<br>BEPSC | B47 |
| 2014 | 3  | 11 | B43, B44 | Week Action on Specialized Enforcement of Air Pollution Control in March.                                                                                                                                                                                                                                               | MEA | BEPSC         | B48 |
| 2014 | 3  | 24 | B43      | Inspection Technical Specifications for Vehicle Emission in Beijing.                                                                                                                                                                                                                                                    | LPA | BEPA          | B49 |

|      |   |    |               |                                                                                                                                                                                                                                                                                                                                                                                                                                                                                                                                                                                               |     |                       |     |
|------|---|----|---------------|-----------------------------------------------------------------------------------------------------------------------------------------------------------------------------------------------------------------------------------------------------------------------------------------------------------------------------------------------------------------------------------------------------------------------------------------------------------------------------------------------------------------------------------------------------------------------------------------------|-----|-----------------------|-----|
| 2014 | 3 | 26 | B43, B44, B49 | Strengthening the key industries and focusing on emission and supervision of key vehicle model.                                                                                                                                                                                                                                                                                                                                                                                                                                                                                               | MEA | BEPA                  | B50 |
| 2014 | 4 | 8  | B43, B44, B49 | City Motor Vehicle Emission Management Center organized the supervision unit of two-stage mobile pollution source in city center with the focus of key industries in high-frequency cars like bus and taxi, and the key vehicles with large capacity of drainage like diesel powered car and old car through road inspection, night check, entering household, and telemetering to strengthen law enforcement inspection, so as to form the high-pressure supervision of "obstruction of the road, stooping entering household, and difficult annual inspection" on the vehicle in violation. | MEA | BMVEMC                | B51 |
| 2014 | 4 | 14 | B48           | Week Action on Specialized Enforcement of Air Pollution Control in April.                                                                                                                                                                                                                                                                                                                                                                                                                                                                                                                     | MEA | BEPA<br>BUMLEB        | B52 |
| 2014 | 4 | 22 | B43, B44      | Special action for environmental protection on vehicle maintenance enterprises in Beijing.                                                                                                                                                                                                                                                                                                                                                                                                                                                                                                    | MEA | BEPA<br>BTMB          | B53 |
| 2014 | 5 | 8  | B52           | Special Enforcement Action on Air Pollution Control in May.                                                                                                                                                                                                                                                                                                                                                                                                                                                                                                                                   | MEA | BEPA<br>BUMLEB        | B54 |
| 2014 | 6 | 9  | B54           | Special Enforcement Action on Air Pollution Control in June.                                                                                                                                                                                                                                                                                                                                                                                                                                                                                                                                  | MEA | BEPA<br>BUMLEB        | B55 |
| 2014 | 6 | 26 | B6            | Supervision on Straw Burning Prohibition in Beijing.                                                                                                                                                                                                                                                                                                                                                                                                                                                                                                                                          | MEA | BEPA<br>BUMLEB<br>BAB | B56 |
| 2014 | 7 | 14 | B55           | Special Enforcement Action on Air Pollution Control in July.                                                                                                                                                                                                                                                                                                                                                                                                                                                                                                                                  | MEA | BEPA<br>BUMLEB        | B57 |
| 2014 | 8 | 14 | B57           | Special Enforcement Action on Air Pollution Control in August.                                                                                                                                                                                                                                                                                                                                                                                                                                                                                                                                | MEA | BEPA<br>BUMLEB        | B58 |
| 2014 | 9 | 12 | B43, R13      | Beijing Motor Vehicle Environmental Protection Management Approach.                                                                                                                                                                                                                                                                                                                                                                                                                                                                                                                           | LPA | BEPA<br>BQSB          | B59 |
| 2014 | 9 | 15 | B16           | Notice on Key Sewage Enterprises and Self-Monitoring and Information Disclosure of Listed Enterprises.                                                                                                                                                                                                                                                                                                                                                                                                                                                                                        | LPA | BEPA                  | B60 |
| 2014 | 9 | 15 | B58           | Special Enforcement Action on Air Pollution Control in September.                                                                                                                                                                                                                                                                                                                                                                                                                                                                                                                             | MEA | BEPA<br>BUMLEB        | B61 |

|      |    |    |                  |                                                                                                                                                      |     |                       |     |
|------|----|----|------------------|------------------------------------------------------------------------------------------------------------------------------------------------------|-----|-----------------------|-----|
| 2014 | 10 | 9  | B61              | Special Enforcement Action on Air Pollution Control in October.                                                                                      | MEA | BEPA<br>BUMLEB        | B62 |
| 2014 | 10 | 24 | B62, R10         | Special supervision on deployment and implementation of air quality assurance measures of APEC Meeting in Huairou District.                          | MEA | BEPSC                 | B63 |
| 2014 | 10 | 27 | B62, R10,<br>R13 | To deploy the Implementation of the Motor Vehicle Emissions Standards and Other Safeguard Measures of 2014 APEC Meeting.                             | MEA | BEPA                  | B64 |
| 2014 | 10 | 31 | B62, R10         | 2014 APEC Beijing Air Quality Assurance Program and 10 sub-plans including Parking, Stop Production and Downtime.                                    | MEA | BG                    | B65 |
| 2014 | 11 | 3  | B62, R10         | Special Enforcement Action on Air Pollution Control in November.                                                                                     | MEA | BEPA<br>BUMLEB        | B66 |
| 2014 | 11 | 5  | B43              | Automatic Monitoring Management Approach on Fixed Pollution Source in Beijing.                                                                       | LPA | BEPA                  | B67 |
| 2014 | 11 | 8  | B59, B66,<br>R13 | Environmental protection departments take multi-measures to supervise the vehicle pollution emissions, so as to promote vehicle emissions standards. | MEA | BEPA                  | B68 |
| 2014 | 11 | 18 | B66              | Night raid monitoring of coal-fired boilers in Tongzhou District.                                                                                    | MEA | BEPSC<br>TEPA<br>BEMC | B69 |
| 2014 | 11 | 19 | B66              | Inspections on coal-fired boilers in nine relatively concentrated districts and counties in Beijing.                                                 | MEA | BEPA                  | B70 |
| 2014 | 12 | 1  | B66              | Special Enforcement Action on Air Pollution Control in December.                                                                                     | MEA | BEPA<br>BUMLEB        | B71 |
| 2014 | 12 | 15 |                  | Regulation on prizes reporting on Environmental Violations Published by Beijing Municipal Environmental Protection Bureau.                           | LPA | BEPA                  | B72 |
| 2014 | 12 | 16 | B71              | Comprehensive law enforcement inspection on coal-fired enterprises and institutions in Beijing.                                                      | MEA | BEPA<br>BQSB          | B73 |
| 2015 | 1  | 5  | B44              | 2015 Work Measures for Key Tasks of 2013-2017 Clean Air Action Plan in Beijing.                                                                      | LPA | BG                    | B74 |
| 2015 | 3  | 2  | B74              | Joint Law Enforcement Action in March (the First Joint Action in 2015) (Original Special Enforcement Action on Air Pollution Control).               | MEA | BEPA<br>BUMLEB        | B75 |
| 2015 | 4  | 10 | B75              | Joint Law Enforcement Action in April.                                                                                                               | MEA | BEPA<br>BUMLEB        | B76 |

|      |   |    |          |                                                                                                                                                                                           |     |                                                |     |
|------|---|----|----------|-------------------------------------------------------------------------------------------------------------------------------------------------------------------------------------------|-----|------------------------------------------------|-----|
| 2015 | 4 | 13 | B76      | 14 illegal sewage were investigated and dealt with in Daxing District.                                                                                                                    | MEA | BEPSC<br>DEPSC                                 | B77 |
| 2015 | 5 | 2  | B76      | Joint Law Enforcement Action in May.                                                                                                                                                      | MEA | BEPA<br>BUMLEB                                 | B78 |
| 2015 | 5 | 12 | B78      | Tongzhou District launched special enforcement to address environmental illegal behaviors.                                                                                                | MEA | BEPA<br>TEPA                                   | B79 |
| 2015 | 5 | 29 | B78      | Concentrated reorganization on automotive vehicle detection site in Beijing.                                                                                                              | MEA | BEPA<br>BQSB<br>BTMB                           | B80 |
| 2015 | 6 | 1  | B78      | Joint law enforcement action in June.                                                                                                                                                     | MEA | BEPA<br>BUMLEB                                 | B81 |
| 2015 | 6 | 19 | B43, R19 | Ideas on Improvement of Atmospheric Pollution Prevention and Control System.                                                                                                              | LPA | BG                                             | B82 |
| 2015 | 6 | 6  | B81, R15 | Remolding on discharge of stage-IV and stage-V diesel-driven public buses in Beijing.                                                                                                     | MEA | BEPA<br>BPBG                                   | B83 |
| 2015 | 7 | 20 | B82      | Special law enforcement inspection on architectural garbage transport carts and construction machines.                                                                                    | MEA | BEPA<br>BCB<br>BHURD<br>BTMB<br>BPSB<br>BUMLEB | B84 |
| 2015 | 8 | 3  |          | Guarantee Plan for Air Quality in Beijing for the event Anniversary to Celebrate the 70th Anniversary of Anti-Japanese Aggression by the Chinese People and the World's Anti-Fascist War. | LPA | BG                                             | B85 |
| 2015 | 8 | 22 | B85, R22 | Law-enforcing inspection and check on 24 entrances to Beijing in 8 districts and counties in Beijing.                                                                                     | MEA | BEPA<br>BMVEMC                                 | B86 |
| 2015 | 8 | 24 | B85      | Stage Four for "Special Law Enforcement Month for Atmosphere".                                                                                                                            | MEA | BEPA<br>BUMLEB<br>BEPSC                        | B87 |
| 2015 | 8 | 26 | B85, R23 | Implementing condition of measures on air quality guarantee including restricted and suspended production in some industrial companies and                                                | MEA | BEPA<br>BEPSC                                  | B88 |

|      |    |    |          |                                                                                                                                                                                                                                              |     |                         |     |
|------|----|----|----------|----------------------------------------------------------------------------------------------------------------------------------------------------------------------------------------------------------------------------------------------|-----|-------------------------|-----|
|      |    |    |          | suspension in work sites during ‘two activities’ period was checked in Shunyi District.                                                                                                                                                      |     |                         |     |
| 2015 | 8  | 27 | B85, R22 | Check is carried out as standard management on vehicle exhaust of guarantee vehicles for livelihood necessities in Xinfadi wholesales market in Fengtai District.                                                                            | MEA | BTMB<br>BEPA<br>BAB     | B89 |
| 2015 | 8  | 28 | B85      | "Defend the Blue Sky" Special Law Enforcement Activity.                                                                                                                                                                                      | MEA | BEPA<br>BEPSC           | B90 |
| 2015 | 10 | 10 | B81      | Joint law enforcement action in October.                                                                                                                                                                                                     | MEA | BEPA<br>BUMLEB<br>BEPSC | B91 |
| 2015 | 10 | 14 | B91      | Special law-enforcing inspection pertinent to automotive repair companies.                                                                                                                                                                   | MEA | BEPA                    | B92 |
| 2015 | 10 | 16 | B82      | Notification on Adjustment of Standards for Charging Discharge of Five Heavy Metal Pollutants by Beijing Municipal Commission of Development and Reform, Beijing Bureau of Finance and Beijing Municipal Bureau of Environmental Protection. | LPA | BFB<br>BDRC             | B93 |
| 2015 | 11 | 2  | B16      | Notification on Carrying Out Transparent Information on Environment in Companies and Institutions by Beijing Municipal Bureau of Environmental Protection.                                                                                   | LPA | BEPA                    | B94 |
| 2015 | 11 | 4  | B91      | Joint law enforcement action in November.                                                                                                                                                                                                    | MEA | BEPA<br>BUMLEB<br>BEPSC | B95 |
| 2015 | 11 | 23 | B95      | Beijing carried out half-a-month-long special law-enforcing inspection behaviors on enterprises processing, selling and using coals throughout Beijing as well as coal quality of bulk coal sellers without license.                         | MEA | BEPA<br>BQSB<br>BAB     | B96 |
| 2015 | 11 | 30 | B43      | Notification on Matters Concerning Inspection and Check of Environmental Protection of Automotive Vehicles at Regular Intervals.                                                                                                             | LPA | BEPA                    | B97 |
| 2015 | 12 | 4  | B97      | Notification on Adopting Transport Management Measures on Yellow-label Cars.                                                                                                                                                                 | LPA | BEPA<br>BTMB<br>BPSB    | B98 |
| 2015 | 12 | 7  | B27, B37 | Districts and enterprises in Beijing would follow requirements on contingency plan for heavy air pollution to hammer at putting into effect various                                                                                          | MEA | BEPA<br>BG              | B99 |

|      |    |   |      |                                                                                                                                                                                                                                                                                                                                                                                                                                                                                                                                                                                                           |     |                                             |      |
|------|----|---|------|-----------------------------------------------------------------------------------------------------------------------------------------------------------------------------------------------------------------------------------------------------------------------------------------------------------------------------------------------------------------------------------------------------------------------------------------------------------------------------------------------------------------------------------------------------------------------------------------------------------|-----|---------------------------------------------|------|
|      |    |   |      | emergency measures and engaging in strict law enforcement to confront heavy pollution process.                                                                                                                                                                                                                                                                                                                                                                                                                                                                                                            |     | BSB<br>BCB<br>BEITC<br>BUMLEB<br>BTMB       |      |
| 2015 | 12 | 7 | B99  | Beijing Launched Red Warning for Heavy Air Pollution for the First Time.                                                                                                                                                                                                                                                                                                                                                                                                                                                                                                                                  | MEA | BAHPEH                                      | B100 |
| 2015 | 12 | 8 | B100 | Guo Jinlong, member of the Political Bureau of the Central Committee and Municipal Party Secretary, came over to the municipal bureau of environmental protection to dig into work in addressing heavy air pollution by listening to work report by the municipal bureau of environmental protection and the municipal weather bureau, analyzing changes on air quality in the city and region and proposing three requirements for emergency work on heavy pollution.                                                                                                                                    | PA  | CPC Politburo<br>Beijing Party<br>Secretary | B101 |
| 2015 | 12 | 8 | B100 | Led by Wang Anshun, vice secretary of the municipal committee and mayor, the team conducted on-spot check on implementing condition of suspension of construction work site in Neuroscience Research Institute, Xuanwu Hospital, parking of official cars in office areas in Central Plaza of the municipal government, restricted travelling of odd and even number for cars. He also learned about diversion of passenger flow in Changchun Street Subway.                                                                                                                                              | PA  | Beijing Party<br>Secretary<br>Beijing Mayor | B102 |
| 2015 | 12 | 8 | B100 | Wang Anshun, vice secretary of the municipal Party Committee and mayor, chaired and convened the meeting via emergency video meeting. He listened to work reports from various departments, gave full consent to implementing condition of various emergency measures and proposed three requirements for further implementation of emergency work.                                                                                                                                                                                                                                                       | PA  | Beijing Party<br>Secretary<br>Beijing Mayor | B103 |
| 2015 | 12 | 8 | B100 | Li Shixiang, member of the municipal committee, standing deputy mayor and chief director in Emergency Guidance Department for Heavy Air Pollution, took the lead to carry out on-spot check on suspension of construction site of western guide hall, second phase of reform for dilapidated houses in Huangtugang in Wangfujing Street. He demanded that the construction worksite should strictly implement suspension, the construction and building parties should arrange special people for around-the-clock guard and the competent department assign inspection teams for ceaseless and irregular | PA  | Beijing Party<br>Secretary<br>Beijing Mayor | B104 |

|      |    |   |      |                                                                                                                                                                                                                                                                                                                                                                                                                                                                                                                                                                                                                                                           |     |                                          |      |
|------|----|---|------|-----------------------------------------------------------------------------------------------------------------------------------------------------------------------------------------------------------------------------------------------------------------------------------------------------------------------------------------------------------------------------------------------------------------------------------------------------------------------------------------------------------------------------------------------------------------------------------------------------------------------------------------------------------|-----|------------------------------------------|------|
|      |    |   |      | inspection. Zero tolerance is adopted for all issues and responsibilities should be strictly claimed. He checked operation condition of public bus dispatching station to the northern side of Beijing Station.                                                                                                                                                                                                                                                                                                                                                                                                                                           |     |                                          |      |
| 2015 | 12 | 8 | B100 | Zhang Gong, member of the municipal committee, secretary general of the municipal committee, deputy mayor and deputy director in Emergency Guidance Department for Heavy Air Pollution, checked limited output in Beijing Ershang Xijie Food Co., Ltd. and suspension of Fuli Canal No. 10 as well as parking and driving of public buses in Tongzhou District. He demanded that supervision and check be intensified on key pollutants of air quality. In the meantime, all measures should form normalization mechanism, various emergency measures should be worked on and social response competence should be boosted during heavy pollution period. | PA  | Beijing Party Secretary<br>Beijing Mayor | B105 |
| 2015 | 12 | 8 | B100 | The municipal governmental supervision room, the municipal supervision bureau and the municipal bureau of environmental protection would form two city-level comprehensive supervision teams to conduct on-spot supervision on implementing condition of emergency measures by the municipal bureau of public securities as well as Fengtai, Shunyi and Changping District.                                                                                                                                                                                                                                                                               | MEA | BG<br>BEPA<br>BSB                        | B106 |
| 2015 | 12 | 8 | B100 | The municipal bureau of environmental protection would form four supervision teams and 20 law-enforcement teams to conduct supervision and inspection on the municipal water supplies bureau, the municipal garden greening bureau, Dongcheng District, Shunyi District and Huairou District. Painting Workshop of Hangxing Car Repair Plant in Dongcheng district was sealed as it was short of approving procedure for environmental protection.                                                                                                                                                                                                        | MEA | BEPA                                     | B107 |
| 2015 | 12 | 8 | B100 | The municipal commission of economy and information technology dispatched 17 supervision teams to conduct on-spot supervision and check on implementation of measures for restricted and suspended production in companies.                                                                                                                                                                                                                                                                                                                                                                                                                               | MEA | BEITC                                    | B108 |
| 2015 | 12 | 8 | B100 | The municipal commission of housing and urban construction formed 9 check teams to conduct on-spot check on 32 work sites and use video monitoring system to carry out non-field patrolling of 766 work sites.                                                                                                                                                                                                                                                                                                                                                                                                                                            | MEA | BHURD                                    | B109 |
| 2015 | 12 | 8 | B100 | The municipal commission of transportation referred to such measures as raising of vehicles and so forth based on passenger flows in a bid to ensure                                                                                                                                                                                                                                                                                                                                                                                                                                                                                                      | MEA | BTMB                                     | B110 |

|      |    |    |          |                                                                                                                                                                                                                                                                                                                                                                                                                                                         |     |               |      |
|------|----|----|----------|---------------------------------------------------------------------------------------------------------------------------------------------------------------------------------------------------------------------------------------------------------------------------------------------------------------------------------------------------------------------------------------------------------------------------------------------------------|-----|---------------|------|
|      |    |    |          | normal operation order for key roads and rail transit and rise of ground public buses to 21,000.                                                                                                                                                                                                                                                                                                                                                        |     |               |      |
| 2015 | 12 | 8  | B100     | The municipal commission of city governance and appearance organized and dispatched 26989 people and 2966 operation cars to enhance cleaning and sanitation of roads. By 4:00 p.m. on the 8th day, 8184 architect garbage transport vehicles integrating to the city's monitoring platforms had basically ceased to operate.                                                                                                                            | MEA | BCB           | B111 |
| 2015 | 12 | 25 | B24, R16 | Work Plan for Water Pollution Control in Beijing.                                                                                                                                                                                                                                                                                                                                                                                                       | LPA | BG            | B112 |
| 2016 | 1  | 13 | B74      | Key assignments for clean air initiatives in 2013-2017 in Beijing, work measures for 2016.                                                                                                                                                                                                                                                                                                                                                              | LPA | BG            | B113 |
| 2016 | 1  | 14 | B113     | Joint special check for coal pollution.                                                                                                                                                                                                                                                                                                                                                                                                                 | MEA | BEPSC         | B114 |
| 2016 | 3  | 10 | B93      | Notification on relevant work matters concerning verification on charging of discharge fees by Beijing municipal bureau of environmental protection.                                                                                                                                                                                                                                                                                                    | LPA | BEPA          | B115 |
| 2016 | 3  | 23 | B95      | Beijing launches "law enforcement year for atmospheric pollution" (formerly known as law enforcement week).                                                                                                                                                                                                                                                                                                                                             | MEA | BEPA          | B116 |
| 2016 | 6  | 23 | B35, B36 | Notification on intensification of relevant work of non-road mobile engineering machinery discharge management.                                                                                                                                                                                                                                                                                                                                         | LPA | BEPA<br>BHURD | B117 |
| 2016 | 10 | 24 | B116     | Pertinent to the characteristics that atmospheric pollution frequently occurs in autumn and winter in our city, Beijing Municipal Environmental Supervision General Team organized environmental protection departments throughout the city to carry out law-enforcement check and supervision. 10 units and places with their wasted gas facilities failing to function normally, open burning and sand failing to be covered are exposed.             | MEA | BEPSC         | B118 |
| 2016 | 11 | 2  | B37      | Beijing Launched Yellow Warning for Heavy Air Pollution.                                                                                                                                                                                                                                                                                                                                                                                                | MEA | BAHPEH        | B119 |
| 2016 | 11 | 3  | B119     | By holding emergency video meetings, the municipal commission of housing and urban construction organized commissions of housing and urban construction (bureau of housing management) in all districts and parent corporate companies to deploy response to tackle with yellow warning for heavy air pollution. They organized over 200 staffs to carry out law-enforcing check on addressing of dust in construction spot and conducted on-spot check | MEA | BHURD         | B120 |

|      |    |    |          |                                                                                                                                                                                                                                                                                                                                                                                         |     |        |      |
|------|----|----|----------|-----------------------------------------------------------------------------------------------------------------------------------------------------------------------------------------------------------------------------------------------------------------------------------------------------------------------------------------------------------------------------------------|-----|--------|------|
|      |    |    |          | on over 300 work sites. By using video monitoring system, they carried out non-field surveillance test on 420 work sites via video monitoring system.                                                                                                                                                                                                                                   |     |        |      |
| 2016 | 11 | 3  | B119     | The urban management departments would timely launch yellow warning operation response, arrange environmental sanitation group and other operating units and environmental sanitation centers in all districts to raise number of clean keepers, intensify cleaning of key roads and arrange 3 groups of city-level test teams to supervise and check key roads in different districts. | MEA | BUMC   | B121 |
| 2016 | 11 | 3  | B119     | Law-enforcing staffs in the environmental protection departments should get engaged in test of law enforcement. Over 300 law-enforcing staffs on environmental protection were dispatched including 9 municipal-level laws-enforcing test groups.                                                                                                                                       | MEA | BEPA   | B122 |
| 2016 | 11 | 3  | B119     | The municipal urban management law enforcement bureau would hold full-system video meeting to deploy and mobilize handling of yellow warning of heavy air pollution. It deployed 2650 law-enforcement staffs, checked 430 work sites and regulated 76 sites. It checked 103 vehicles of muck and regulated 45. It checked 18 open burning and open barbecue.                            | MEA | BUMLEB | B123 |
| 2016 | 11 | 3  | B119     | The municipal governmental supervision office would timely release notification for supervision to its membership units demanding that they organize and hold mobilization and deployment in their respective districts and system and that relevant law-enforcing departments should carry out law-enforcing check at the grassroots with information feedback being registered.       | MEA | BG     | B124 |
| 2016 | 11 | 3  | B119     | The municipal public security bureau and traffic management bureau would intensify law-enforcing check degree on such heavy-duty vehicles as muck vehicle and so forth.                                                                                                                                                                                                                 | MEA | BPSB   | B125 |
| 2016 | 11 | 3  | B119     | The Ministry of Environmental Protection would join experts and some media from Beijing Municipal Bureau of Environmental Protection and China Automobile Research Center to conduct all-day on-spot check on 17 mobile sources in Beijing.                                                                                                                                             | MEA | BEPA   | B126 |
| 2016 | 11 | 15 | B116     | “Double random” check launched for key fixed pollution sources in Beijing.                                                                                                                                                                                                                                                                                                              | MEA | BEPA   | B127 |
| 2016 | 11 | 21 | B37, R36 | The newly-amended Emergency Preplan for Heavy Air Pollution in Beijing.                                                                                                                                                                                                                                                                                                                 | LPA | BG     | B128 |

|                                              |    |    |      |                                                                                                                                    |     |        |      |
|----------------------------------------------|----|----|------|------------------------------------------------------------------------------------------------------------------------------------|-----|--------|------|
| 2016                                         | 12 | 5  | B116 | "Zero-hour initiative" launched in Beijing for night check on environmental protection.                                            | MEA | BAHPEH | B129 |
| <b>Part C: Autonomous actions in Tianjin</b> |    |    |      |                                                                                                                                    |     |        |      |
| 1994                                         | 11 | 30 |      | Tianjin Environment Protection Regulations.                                                                                        | LPA | TPC    | T1   |
| 2000                                         | 7  | 21 | T1   | Tianjin Management Method of Environment Protection of Construction projects.                                                      | LPA | TG     | T2   |
| 2002                                         | 4  | 18 |      | Tianjin Management Regulations for Pollution Control of Water Sources of Luanhe River Diversion Project.                           | LPA | TPC    | T3   |
| 2002                                         | 7  | 18 |      | Tianjin Regulations for Air Pollution Control.                                                                                     | LPA | TPC    | T4   |
| 2002                                         | 10 | 11 | T1   | Tianjin Management Method of Water Protection of Tianjin City for the Project of Diverting Water from the Yellow River to Tianjin. | LPA | TG     | T5   |
| 2004                                         | 1  | 7  | T1   | Tianjin Management Method of Water Pollution Control.                                                                              | LPA | TG     | T6   |
| 2005                                         | 11 | 14 |      | Temporal Method of Tianjin City for Shutting -down Small-Size Chemical Plants of Severe Pollution.                                 | LPA | TG     | T7   |
| 2007                                         | 9  | 12 |      | Outline of Construction Planning of Tianjin Ecological City.                                                                       | LPA | TG     | T8   |
| 2008                                         | 1  | 2  | T8   | Construction Action Plan of Tianjin Ecological City from 2008 to 2010.                                                             | LPA | TG     | T9   |
| 2010                                         | 8  | 5  |      | Notification for forwarding the Information Disclosure of Environment Protection in Public Institutions.                           | LPA | TEPA   | T10  |
| 2010                                         | 8  | 5  | T10  | Work Plan for Government Information Disclosure of Tianjin Environmental Protection Bureau.                                        | LPA | TEPA   | T11  |
| 2010                                         | 10 | 15 | T8   | The 12th Five-Year Plan for Tianjin Ecological Construction.                                                                       | LPA | TG     | T121 |
| 2010                                         | 10 | 20 | T12  | Construction Action Plan of Tianjin Ecological City from 2011 to 2013.                                                             | LPA | TG     | T13  |
| 2011                                         | 3  | 24 | T13  | Key Work Points of Environment Protection of Tianjin in 2011.                                                                      | LPA | TEPA   | T14  |
| 2011                                         | 11 | 18 | T14  | Work Plan for Controlling Yellow Label Vehicles of Tianjin.                                                                        | LPA | TG     | T15  |
| 2011                                         | 12 | 8  | T15  | Tianjin comprehensively starts the work of controlling the yellow label vehicles.                                                  | MEA | TEPA   | T16  |
| 2012                                         | 3  | 22 | T14  | Key Work Points of Environment Protection of Tianjin in 2012.                                                                      | LPA | TEPA   | T17  |
| 2012                                         | 12 | 6  | T11  | Methods of Government Information Disclosure of Key Work of Environmental Protection in Tianjin.                                   | LPA | TEPA   | T18  |
| 2013                                         | 1  | 30 | T17  | Key Work Points of Environmental Protection of Tianjin in 2013.                                                                    | LPA | TEPA   | T19  |

|      |    |    |         |                                                                                                                                                                              |     |      |     |
|------|----|----|---------|------------------------------------------------------------------------------------------------------------------------------------------------------------------------------|-----|------|-----|
| 2013 | 5  | 9  | T18     | Opinions on Carrying out Government Information Disclosure and Government Website Work of Tianjin Environmental Protection Bureau in 2013.                                   | LPA | TEPA | T20 |
| 2013 | 8  | 20 | T20     | Notice on Further Deepening Government Key Information Disclosure of Tianjin Environmental Protection Bureau.                                                                | LPA | TEPA | T21 |
| 2013 | 10 | 17 |         | "Beautiful Tianjin No. 1 Project" and Set up Air Cleaning Headquarters of Tianjin.                                                                                           | LPA | TG   | T22 |
| 2013 | 11 | 12 | T22, R1 | Emergency Plan for Heavy Pollution Weather of Tianjin.                                                                                                                       | LPA | TEPA | T23 |
| 2014 | 1  | 3  | T21     | Notice on Doing a Good Job of Government Information Disclosure on Construction Project Environmental Impact Assessment of Environmental Protection Bureau.                  | LPA | TEPA | T24 |
| 2014 | 2  | 20 | T19     | Key Work Points of Environment Protection of Tianjin in 2014.                                                                                                                | LPA | TEPA | T25 |
| 2014 | 5  | 13 |         | Tianjin Plan for Environmental Emergencies.                                                                                                                                  | LPA | TEPA | T26 |
| 2015 | 2  | 25 | T25     | Key Work Points of Environmental Protection of Tianjin in 2015.                                                                                                              | LPA | TEPA | T27 |
| 2015 | 4  | 27 | T27     | The First Round Inspection on Air and Water Environmental Pollution Prevention and Control Work Across Tianjin.                                                              | MEA | TEPA | T28 |
| 2015 | 9  | 21 | T28     | The Second Round of Inspection on Air and Water Environmental Pollution Prevention and Control Work Across Tianjin.                                                          | MEA | TEPA | T29 |
| 2015 | 10 | 21 | T27     | Comprehensive Coal-fired Heating Boiler Supervision and Inspection Across Tianjin.                                                                                           | MEA | TEPA | T30 |
| 2015 | 10 | 9  | T22     | Emergency Notice on Strengthening the Air Pollution Prevention and Control Work This Winter and Next Spring.                                                                 | LPA | TFAH | T31 |
| 2015 | 10 | 10 | T31     | Work Plan for Special Law Enforcement Inspection of Motor Vehicle Excessive Emission in this Winter and Next Spring.                                                         | LPA | TFAH | T32 |
| 2015 | 10 | 11 | T32     | "Action in Hundred Days": Severely Punishing All Kinds of Illegal Acts on Motor Vehicles Excessive Emission.                                                                 | MEA | TEPA | T33 |
| 2015 | 10 | 19 | T29     | Implementation Opinions on the Action Plan for Water Pollution Prevention and Control of the State Council and Accelerating the Water Pollution Prevention and Control Work. | LPA | TG   | T34 |
| 2015 | 11 | 30 | T29     | The Third Round Environmental Inspection and Emergency Response Action for Heavy Pollution Weather.                                                                          | MEA | TEPA | T35 |

|      |    |    |     |                                                                                                                                                                                                                                                                                                                                                                                                                                                                                                                                                                                                       |     |                         |     |
|------|----|----|-----|-------------------------------------------------------------------------------------------------------------------------------------------------------------------------------------------------------------------------------------------------------------------------------------------------------------------------------------------------------------------------------------------------------------------------------------------------------------------------------------------------------------------------------------------------------------------------------------------------------|-----|-------------------------|-----|
| 2015 | 12 | 9  | T35 | Led by Deputy Secretary Wang Dongfeng, the team went to Dongli, Hebei, Heping and other districts to conduct spot unannounced visits on key point positions, emphasizing that we shall focus on various works dealing with the heavy pollution weather, increase turnoff, shutoff, emission reduction efforts, implement the task and responsibility to the enterprise and grassroots step by step, so as to achieve new results.                                                                                                                                                                     | PA  | Tianjin Party Secretary | T36 |
| 2015 | 12 | 15 |     | Implementation Opinion on Strengthening the Environmental Supervision and Law Enforcement.                                                                                                                                                                                                                                                                                                                                                                                                                                                                                                            | LPA | TEPA                    | T37 |
| 2015 | 12 | 21 | T31 | To implement the spirit of Notice on Making a Good Job of Air Pollution Prevention and Control in this Winter and next Spring issued by the Ministry of Environmental Protection to further increase the environmental law enforcement efforts in our city to strengthen the law enforcement inspection exchanges and collaboration, and to play a leading role in supervision and deterrence, in late December, the environmental protection system of our city will organize and carry out the air pollution prevention and control cross-check activities in winter at district and county levels. | MEA | TEPA                    | T38 |
| 2016 | 1  | 6  |     | Work Plan for Water Pollution Prevention and Control in Tianjin.                                                                                                                                                                                                                                                                                                                                                                                                                                                                                                                                      | LPA | TG                      | T39 |
| 2016 | 2  | 5  | T27 | Objectives and Tasks of the 13th Five-Year Environmental Protection Plan and Key Work Points of Environmental Protection of Tianjin in 2016.                                                                                                                                                                                                                                                                                                                                                                                                                                                          | LPA | TG                      | T40 |
| 2016 | 2  | 22 | T40 | Work Plan for Coal-Burning Pollution in Small Workshop and Small Factory of Tianjin in 2016.                                                                                                                                                                                                                                                                                                                                                                                                                                                                                                          | MEA | TEPA                    | T41 |
| 2016 | 3  | 1  | T39 | Provisions on Application Principle of Administrative Punishment Discretion of Regulations on Water Pollution Prevention and Control in Tianjin.                                                                                                                                                                                                                                                                                                                                                                                                                                                      | LPA | TEPA                    | T42 |
| 2016 | 3  | 1  | T42 | Discretion Benchmark of Common Water Environment Illegal Facts.                                                                                                                                                                                                                                                                                                                                                                                                                                                                                                                                       | LPA | TEPA                    | T43 |
| 2016 | 3  | 5  | T42 | Hundred-day Special Law Enforcement Action of Water Pollution Prevention and Control.                                                                                                                                                                                                                                                                                                                                                                                                                                                                                                                 | MEA | TEPA                    | T44 |
| 2016 | 4  | 12 | T41 | Work Plan for Coal-Burning Pollution Control in Small Workshop and Small Factory of Tianjin in 2016.                                                                                                                                                                                                                                                                                                                                                                                                                                                                                                  | MEA | TEPA                    | T45 |
| 2016 | 4  | 25 | T39 | To further strengthen the industrial pollution prevention and control, improve the water environment quality of our city, in accordance with the requirements of Work Plan for Water Pollution Prevention and Control of                                                                                                                                                                                                                                                                                                                                                                              | MEA | TEPA                    | T46 |

|      |    |    |     |                                                                                                                                                                                                                                                                                                                                                                                                                                                                                                                                                                                                                                                                                                                                     |     |                     |     |
|------|----|----|-----|-------------------------------------------------------------------------------------------------------------------------------------------------------------------------------------------------------------------------------------------------------------------------------------------------------------------------------------------------------------------------------------------------------------------------------------------------------------------------------------------------------------------------------------------------------------------------------------------------------------------------------------------------------------------------------------------------------------------------------------|-----|---------------------|-----|
|      |    |    |     | Tianjin City in 2016, this year our city shall complete the control work of 40 wastewater direct discharging industrial enterprises and 4 rural decentralized industrial water pollution sources.                                                                                                                                                                                                                                                                                                                                                                                                                                                                                                                                   |     |                     |     |
| 2016 | 5  | 9  | T39 | Regulations on Water Pollution Prevention and Control of Tianjin.                                                                                                                                                                                                                                                                                                                                                                                                                                                                                                                                                                                                                                                                   | LPA | TEPA                | T47 |
| 2016 | 5  | 26 | T40 | In accordance with the requirements of Opinions on Strengthening Recent Work on Air Pollution Prevention and Control of Municipal Environmental Protection Bureau and special inspection work program of key districts and counties of the Municipal Environmental Monitoring Corps, recently, Tianjin Environmental Monitoring Corps has continued to conduct supervision to Jinghai District.                                                                                                                                                                                                                                                                                                                                     | MEA | TEMC                | T48 |
| 2016 | 6  | 23 | T40 | In order to further strengthen the environmental supervision and increase the mandatory pollution control efforts, in accordance with the requirements of the Ministry of Environmental Protection, combined with the overall deployment of "Beautiful Tianjin No. 1 Project", regarding environmental quality improvement as the core, from June to November, the environmental protection departments of our city will set iron and steel industry, cement manufacturing industry, flat glass manufacturing industry, urban sewage treatment plants, hazardous waste generation and disposal units as the focus, conduct in-depth environmental law enforcement inspection, and make serious investigation of illegal activities. | MEA | TEPA                | T49 |
| 2016 | 7  | 13 | T40 | To strengthen the prevention and control of motor vehicles and to improve the ambient air quality, from May to June, the environmental protection departments of our city in conjunction with the traffic management departments, traffic and transportation sectors will continue to jointly carry out special law enforcement inspection of motor vehicle, crack down on black smoke, excessive emissions and other illegal activities.                                                                                                                                                                                                                                                                                           | MEA | TEPA<br>TPSB<br>TTC | T50 |
| 2016 | 9  | 6  |     | To Investigate Strictly the Motor Vehicle Pollution, Tianjin Has Newly Built 15 Remote Sensing Monitoring Gate Stations.                                                                                                                                                                                                                                                                                                                                                                                                                                                                                                                                                                                                            | MEA | TEPA                | T51 |
| 2016 | 9  | 19 | T40 | Environmental Law Enforcement Has Reported 10 Typical Cases of Environmental Violations in September.                                                                                                                                                                                                                                                                                                                                                                                                                                                                                                                                                                                                                               | MEA | TEPA                | T52 |
| 2016 | 10 | 3  | T40 | Vice Mayor Sun Wenkui led the responsible comrades of Municipal Environmental Protection Bureau, Construction Committee, Traffic                                                                                                                                                                                                                                                                                                                                                                                                                                                                                                                                                                                                    | PA  | Tianjin Mayor       | T53 |

|      |    |    |     |                                                                                                                                                                                                                                                                                                                                                                                                                                            |     |                                          |     |
|------|----|----|-----|--------------------------------------------------------------------------------------------------------------------------------------------------------------------------------------------------------------------------------------------------------------------------------------------------------------------------------------------------------------------------------------------------------------------------------------------|-----|------------------------------------------|-----|
|      |    |    |     | Committee, Industry and Information Technology Committee, Municipal Bureau of Parks, Traffic Management Bureau and other departments to conduct on-site inspection of the implementation situation of heavy pollution weather emergency measures in Hexi District, Dongli District, and Binhai New District.                                                                                                                               |     |                                          |     |
| 2016 | 10 | 8  | T40 | Environmental Law Enforcement Has Reported 10 Typical Cases of Environmental Violations in October.                                                                                                                                                                                                                                                                                                                                        | MEA | TEPA                                     | T54 |
| 2016 | 10 | 9  | T22 | The Second Round Major Inspection of Air and Water Pollution Control.                                                                                                                                                                                                                                                                                                                                                                      | MEA | TEPA                                     | T55 |
| 2016 | 10 | 12 | T55 | Special Law Enforcement Inspection of Environmental Protection Facilities for Coal-fired Boilers.                                                                                                                                                                                                                                                                                                                                          | MEA | TEPA                                     | T56 |
| 2016 | 10 | 28 |     | Emergency Plan for Heavy Pollution Weather of Tianjin.                                                                                                                                                                                                                                                                                                                                                                                     | LPA | TEPA                                     | T57 |
| 2016 | 11 | 2  | T39 | Implementation Plan for Water Pollution Concentration Management in Industrial Agglomeration Area of Tianjin.                                                                                                                                                                                                                                                                                                                              | LPA | TEPA                                     | T58 |
| 2016 | 11 | 14 | T55 | Cross and Inter-Checking Special Law Enforcement Inspection of Air Pollution Prevention and Control.                                                                                                                                                                                                                                                                                                                                       | MEA | TEPA                                     | T59 |
| 2016 | 11 | 23 |     | Licensing System of Pollutant Emission Control to Provide New Support for Improving the Ecological Environment Quality.                                                                                                                                                                                                                                                                                                                    | LPA | TEPA                                     | T60 |
| 2016 | 12 | 4  | T57 | Mayor Wang Dongfeng Led the Team to Conduct Undercover Investigation of the Implementation Situation of Heavy Pollution Emergency Measures.                                                                                                                                                                                                                                                                                                | PA  | Tianjin Mayor                            | T61 |
| 2016 | 12 | 5  |     | Beijing and Tianjin Carried Out the First Joint Law Enforcement Inspection of the Excessive Emissions of Motor Vehicle.                                                                                                                                                                                                                                                                                                                    | MEA | TEPA                                     | T62 |
| 2016 | 12 | 9  | T57 | Heavy Pollution Weather Orange Warning, Tianjin strictly Conducted Limited Production and Emission Reduction.                                                                                                                                                                                                                                                                                                                              | MEA | TEPA                                     | T63 |
| 2016 | 12 | 19 | T57 | Interim Measures for Implementing Environmental Protection Yellow Card Management System of Environmental Protection System of Tianjin.                                                                                                                                                                                                                                                                                                    | LPA |                                          | T64 |
| 2016 | 12 | 19 | T63 | Secretary of Municipal Committee Li Hongzhong and Mayor Wang Dongfeng gave several instructions on the heavy pollution weather emergency work; Member of Standing Committee, Executive Deputy Mayor Duan Chunhua, Vice Mayor He Shushan and Vice Mayor Sun Wenkui presided over special session for heavy pollution weather emergency work; and then the municipal government held another meeting to schedule the heavy pollution weather | PA  | Tianjin Party Secretary<br>Tianjin Mayor | T65 |

|                                            |    |    |     |                                                                                                                                                                                                                                    |     |              |     |
|--------------------------------------------|----|----|-----|------------------------------------------------------------------------------------------------------------------------------------------------------------------------------------------------------------------------------------|-----|--------------|-----|
|                                            |    |    |     | emergency work, requiring various departments at all levels of the city to further strengthen and refine the implementation of all emergency measures, full posts, 24 hours marking, so as to strictly control the pollution peak. |     |              |     |
| <b>Part D: Autonomous actions In Hebei</b> |    |    |     |                                                                                                                                                                                                                                    |     |              |     |
| 1994                                       | 11 | 5  |     | Regulations on Environmental Protection of Hebei Province.                                                                                                                                                                         | LPA | HPC          | H1  |
| 1995                                       | 1  | 13 |     | Regulations on Air Pollution Control of Hebei Province.                                                                                                                                                                            | LPA | HPC          | H2  |
| 1995                                       | 5  | 2  |     | Regulations on Environmental Protection and Management of Baiyangdian Water Body of Hebei Province.                                                                                                                                | LPA | HP           | H3  |
| 1996                                       | 12 | 17 |     | Regulations on Environmental Protection Administration of Construction Projects of Hebei Province.                                                                                                                                 | LPA | HPC          | H4  |
| 1997                                       | 10 | 25 |     | Regulations on Water Pollution Control of Hebei Province.                                                                                                                                                                          | LPA | HPC          | H5  |
| 2000                                       | 1  | 5  | H1  | Methods of Administrative Punishment for Environmental Protection of Hebei Province.                                                                                                                                               | LPA | HEPA         | H6  |
| 2000                                       | 8  | 15 | H1  | Environmental Pollution Accident Emergency Response Plan of Environmental Protection Bureau of Hebei Province, and establish Environmental Pollution Accident Emergency Response Center of Hebei Province.                         | LPA | HEPA         | H7  |
| 2000                                       | 9  | 10 | H6  | Method of Law Enforcement Accountability of Environmental Protection of Bureau of Hebei Province.                                                                                                                                  | LPA | HEPA         | H8  |
| 2001                                       | 12 | 21 | H1  | Method of Environmental Monitoring of Hebei Province.                                                                                                                                                                              | LPA | HP           | H9  |
| 2003                                       | 6  | 27 | H6  | Implementation Methods of Collecting and Using Sewage Discharges of Hebei Province.                                                                                                                                                | LPA | HPDF<br>HEPA | H10 |
| 2003                                       | 7  | 21 | H10 | Special campaign of improving and rectifying illegal pollution emission enterprises in Hebei Province.                                                                                                                             | MEA | HEPA         | H11 |
| 2003                                       | 7  | 28 | H11 | Special campaign of strictly investigating environmental violations of drinking water sources in Handan City.                                                                                                                      | MEA | HDEPA        | H12 |
| 2003                                       | 7  | 29 | H11 | Special campaign of clearing up and rectifying illegal pollution emission enterprises in Hengshui City.                                                                                                                            | MEA | HSEPA        | H13 |
| 2003                                       | 8  | 1  | H11 | Baoding city conscientiously implemented the special campaign of basin and region pollution prevention and control and strict investigation across the province.                                                                   | MEA | BDEAP        | H14 |

|      |    |    |     |                                                                                                                                                                                                                   |     |         |     |
|------|----|----|-----|-------------------------------------------------------------------------------------------------------------------------------------------------------------------------------------------------------------------|-----|---------|-----|
| 2003 | 8  | 8  | H11 | Luan county carried out the environmental protection special campaign of clearing up and rectifying illegal pollution emission enterprises to protect the public health.                                          | MEA | LCEPA   | H15 |
| 2003 | 8  | 11 | H11 | Tangshan city carried out the environmental protection special campaign of clearing up and rectifying illegal pollution emission enterprises to protect the public health.                                        | MEA | TSEPA   | H16 |
| 2003 | 8  | 13 | H11 | Tangshan city severely investigated the illegal pollution emission enterprises to promote the special campaign of environmental protection in the province.                                                       | MEA | TSEPA   | H17 |
| 2003 | 8  | 19 | H11 | Langfang city carried out five inspections to clear up and rectify illegal pollution emission enterprises.                                                                                                        | MEA | LFEPa   | H18 |
| 2003 | 9  | 28 |     | Implementation Plan for Ecological Environmental Monitoring Pilot Project of Hebei Province.                                                                                                                      | LPA | HEPA    | H19 |
| 2004 | 5  | 19 |     | Work Plan for Environmental Protection Special Campaign of rectifying the Illegal Pollution Emission Enterprises to Protect the Public Health.                                                                    | LPA | HEPA    | H20 |
| 2004 | 8  | 6  | H20 | Supervision and Inspection Plan for Environmental Protection Special Campaign of Illegal Pollution Emission Enterprises to Protect the Public Health of Hebei Province in 2004.                                   | LPA | HEPSALG | H21 |
| 2004 | 11 | 19 | H19 | Forward Notice on Further Accelerating the Standardization Construction of Environmental Monitoring of the State Environmental Protection Administration Office to enhance the environmental inspection capacity. | LPA | HEPA    | H22 |
| 2004 | 12 | 10 | H22 | Environmental Protection Bureau of Hebei Province conducted the standardization construction acceptance inspection on environmental monitoring agencies of Jize County and Daming County.                         | MEA | HEPA    | H23 |
| 2004 | 12 | 10 | H22 | Environmental Protection Bureau of Hebei Province completed the standardization compliance acceptance work of the environmental monitoring agency of Hengshui City.                                               | MEA | HEPA    | H24 |
| 2004 | 12 | 10 | H22 | Environmental Protection Bureau of Hebei Province completed the standardization compliance acceptance work of the environmental monitoring agency of Qinhuangdao City.                                            | MEA | HEPA    | H25 |

|      |    |    |     |                                                                                                                                                                                        |     |          |     |
|------|----|----|-----|----------------------------------------------------------------------------------------------------------------------------------------------------------------------------------------|-----|----------|-----|
| 2004 | 12 | 10 | H22 | Environmental Protection Bureau of Hebei Province conducted the standardization construction acceptance inspection on the environmental monitoring agency of Cangzhou City.            | MEA | HEPA     | H26 |
| 2005 | 3  | 5  |     | Hebei Planning Outline for Ecological Province Construction.                                                                                                                           | LPA | HP       | H27 |
| 2005 | 4  | 22 | H22 | Environmental Protection Bureau Hebei Province conducted the standardization construction acceptance inspection on the environmental monitoring agency of Xingtai City.                | MEA | HEPA     | H28 |
| 2005 | 5  | 25 | H22 | Implementation Plan for Carrying out Special Inspection on the Prominent Problems about the Illegal Pollution Emission of the Enterprises Harming the Interests of the General Public. | LPA | HEPA     | H29 |
| 2007 | 12 | 5  | H27 | Energy-Saving Emission Reduction "Double Thirty" Project of Hebei Province, and Establish "Double Thirty" Energy-saving Emission Reduction Work Leading Group of Hebei Province.       | LPA | HP       | H30 |
| 2008 | 4  | 30 | H30 | Implementation plan for Pollution Emission Reduction in 2008 of "Double Thirty" enterprises.                                                                                           | LPA | HDTERSLG | H31 |
| 2009 | 4  | 30 | H31 | Implementation plan for Pollution Emission Reduction in 2009 of "Double Thirty" enterprises.                                                                                           | LPA | HDTERSLG | H32 |
| 2009 | 5  | 27 | H30 | Provisions on Pollutant Emission Reduction of Hebei Province.                                                                                                                          | LPA | HPC      | H33 |
| 2010 | 4  | 30 | H32 | Implementation plan for Pollution Emission Reduction in 2010 of "Double Thirty" enterprises.                                                                                           | LPA | HDTERSLG | H34 |
| 2010 | 12 | 28 | H33 | Measures of Main Pollutant Emission Trading Management of Hebei Province.                                                                                                              | LPA | HP       | H35 |
| 2011 | 5  | 8  | H34 | Implementation plan for Pollution Emission Reduction in 2011 of "Double Thirty" enterprises.                                                                                           | LPA | HDTERSLG | H36 |
| 2012 | 5  | 8  | H36 | Implementation plan for Pollution Emission Reduction in 2012 of "Double Thirty" enterprises.                                                                                           | LPA | HDTERSLG | H37 |
| 2012 | 5  | 16 | H27 | Implementation Plan for Ecological Environment Management of the Provincial Capital of Hebei Province.                                                                                 | LPA | SJZEPA   | H38 |
| 2012 | 11 | 22 | H33 | Measures of Motor Vehicle Exhaust Pollution Prevention and Control of Hebei Province.                                                                                                  | LPA | HP       | H39 |
| 2013 | 2  | 1  | H33 | Environmental Protection Office of Hebei Province carried out the "three investigation" action, including illegal pollution emission investigation,                                    | MEA | HEPA     | H40 |

|      |    |    |          |                                                                                                                                                                                                                             |     |                  |     |
|------|----|----|----------|-----------------------------------------------------------------------------------------------------------------------------------------------------------------------------------------------------------------------------|-----|------------------|-----|
|      |    |    |          | excessive pollution emission investigation and malicious pollution emission investigation.                                                                                                                                  |     |                  |     |
| 2013 | 3  | 1  | H27      | Measures of Heavy Air Pollution Emergency Management of Hebei Province.                                                                                                                                                     | LPA | HP               | H41 |
| 2013 | 4  | 30 | H27      | Implementation Plan for Ecological and Rural Environmental Monitoring Work.                                                                                                                                                 | LPA | HEPA             | H42 |
| 2013 | 5  | 1  | H42      | Hebei carried out two major actions in air and water environment remediation.                                                                                                                                               | MEA | HEPA             | H43 |
| 2013 | 5  | 14 | H37      | Implementation plan for Pollution Emission Reduction in 2013 of "Double Thirty" enterprises.                                                                                                                                | LPA | HDTESERLG        | H44 |
| 2013 | 9  | 6  |          | Implementation Plan for Air Pollution Prevention and Control Action of Hebei Province                                                                                                                                       | LPA | HEPA             | H45 |
| 2013 | 10 | 21 | H45      | Liability Statement of Air Pollution Prevention and Control Objectives.                                                                                                                                                     | LPA | HP               | H46 |
| 2013 | 10 | 28 | H45      | Joint Meeting System of Air Pollution Prevention and Control of the Provincial Capital.                                                                                                                                     | LPA | HAPCLG           | H47 |
| 2013 | 11 | 6  | H39, H45 | Notice on Strengthening the Environmental Protection Inspection of Motor Vehicle and the Management Work of Vehicles Transferred from Other Places.                                                                         | LPA | HEPA<br>HPSB     | H48 |
| 2013 | 11 | 8  | H45      | Baoding city carried out the action of "Washing City and Cleaning Air".                                                                                                                                                     | MEA | BDEPA            | H49 |
| 2013 | 11 | 18 | H45      | Environmental protection and public security departments of Hebei Province jointly launched the special campaign of "Cracking down Environmental Pollution Crimes".                                                         | MEA | HEPA<br>HPSB     | H50 |
| 2013 | 12 | 30 | H45, R1  | Implementation Opinions on Environmental Governance Crucial Action of Hebei Province.                                                                                                                                       | LPA | HEPA             | H51 |
| 2014 | 3  | 20 | H45      | Zhangjiakou city launched the "Clean Water Project".                                                                                                                                                                        | LPA | ZJKEPA           | H52 |
| 2014 | 4  | 30 | H51      | Shijiazhuang city launched the "Spring Thunder" action to crack down on environmental violations.                                                                                                                           | MEA | SJZEPA<br>SJZPSB | H53 |
| 2014 | 5  | 20 | H51      | Hebei Province Environmental Protection Department and Provincial Public Security Department jointly launched the second concentrated action of zero hour action of "Cracking down Environmental Pollution Crimes" in 2014. | MEA | HEPA<br>HPSB     | H54 |
| 2014 | 7  | 2  | H51, R7  | Implementation Plan for Air Pollution Prevention and Control of Hebei Province in 2014.                                                                                                                                     | LPA | HAPCLG           | H55 |

|      |    |    |          |                                                                                                                                                                                                                                               |     |                                                                                                            |     |
|------|----|----|----------|-----------------------------------------------------------------------------------------------------------------------------------------------------------------------------------------------------------------------------------------------|-----|------------------------------------------------------------------------------------------------------------|-----|
| 2014 | 8  | 6  | H51      | Supervision and Inspection Plan for Environmental Protection Special Campaign of Illegal Pollution Emission Enterprises to Protect the Public Health of Hebei Province in 2014.                                                               | LPA | HEPSALG                                                                                                    | H56 |
| 2014 | 8  | 12 |          | Hebei Province Environmental Protection Department held the environmental information and automatic monitoring work conference across the province.                                                                                           | LPA | HEPA                                                                                                       | H57 |
| 2014 | 11 | 7  | R10      | Vice governor scheduling meeting for APEC air quality assurance.                                                                                                                                                                              | PA  | HEPA<br>DIRECTOR<br>HIIT DIRECTOR<br>HPSB<br>DIRECTOR<br>HHURD<br>DIRECTOR<br>HTD DIRECTOR<br>HMA DIRECTOR | H58 |
| 2014 | 11 | 8  | R10      | Director Chen Guoying accompanied the leaders of the Ministry of Environmental Protection to conduct supervision and inspection of the air quality assurance work of the APEC meeting in Baoding city.                                        | PA  | HEPA<br>DIRECTOR                                                                                           | H59 |
| 2014 | 11 | 28 |          | Regulations on Environmental Protection Public Participation of Hebei Province.                                                                                                                                                               | LPA | HPC                                                                                                        | H60 |
| 2015 | 1  | 7  |          | Detailed Rules for Environmental Protection Indicator Evaluation of County Construction across the Province in 2014.                                                                                                                          | LPA | HAPCLG                                                                                                     | H61 |
| 2015 | 2  | 27 | H51      | Hebei Province Environmental Protection Department and Provincial Public Security Department jointly launched the zero hour action of the second remote law enforcement spot check of "Cracking down Environmental Pollution Crimes" in 2015. | MEA | HEPA<br>HPSB                                                                                               | H62 |
| 2015 | 3  | 26 |          | Regulations on Solid Wastes Environmental Pollution Prevention and Control of Hebei Province.                                                                                                                                                 | LPA | HPC                                                                                                        | H63 |
| 2015 | 4  | 7  | H45      | Three Years (2015-2017) Deepening Action Plan for Air Pollution Governance of Hebei Province.                                                                                                                                                 | LPA | HAPCLG                                                                                                     | H64 |
| 2015 | 5  | 27 | H64, R19 | Key Work Points of Air Pollution Prevention and Control of Hebei Province in 2015.                                                                                                                                                            | LPA | HAPCLG                                                                                                     | H65 |

|      |   |    |          |                                                                                                                                                                                                                                                                                                                                                                                                                                                                                                               |     |        |     |
|------|---|----|----------|---------------------------------------------------------------------------------------------------------------------------------------------------------------------------------------------------------------------------------------------------------------------------------------------------------------------------------------------------------------------------------------------------------------------------------------------------------------------------------------------------------------|-----|--------|-----|
| 2015 | 7 | 14 | H65      | Implementation Plan for Air Pollution Prevention and Control of Hebei Province in 2015.                                                                                                                                                                                                                                                                                                                                                                                                                       | LPA | HAPCLG | H66 |
| 2015 | 8 | 20 | R23      | The Provincial Environmental Protection Department held an executive meeting to study the Supervision and Inspection Plan for Air Quality Assurance Work of Hebei Province of the Commemoration Activity of the 70th Anniversary of the Victory of the Chinese People's War Against Japanese and the World Anti-fascist War, and set up a site supervision and inspection headquarter.                                                                                                                        | PA  |        | H67 |
| 2015 | 8 | 23 | R23      | Deputy Director of the Provincial Environmental Protection Department Yin Guangping presided over the mobilization meeting of the supervision and inspection of air quality assurance of the Commemoration Activity of the 70th Anniversary of the Victory of the World Anti-Fascist War, conducted intensive training on the supervisors and inspectors to further clarify the time, content, objectives, standards and discipline requirements.                                                             | PA  |        | H68 |
| 2015 | 8 | 24 | R23      | The television and telephone conference air quality assurance work of Hebei Province of the Commemoration Activity of the 70th Anniversary of the Victory of the Chinese People's War Against Japanese and the World Anti-fascist War was held in Shijiazhuang.                                                                                                                                                                                                                                               | PA  |        | H69 |
| 2015 | 8 | 31 | R23      | The Provincial Public Security Department attached great importance to the air quality assurance work of the Commemoration Activity of the 70th Anniversary of the Victory of the World Anti-Fascist War, and decided to carry out a 10-day centralized remediation campaign against the key periods, key areas, key industries and key pollution sources which could have the possible impact on the of the air quality during the commemoration activity from August 24 to September 4 across the province. | PA  |        | H70 |
| 2016 | 2 | 27 | R17, R29 | Plan for Establishing Ecological Environment Support Area of Beijing-Tianjin-Hebei Region of Hebei Province (2016-2020).                                                                                                                                                                                                                                                                                                                                                                                      | LPA | HP     | H71 |
| 2016 | 6 | 30 |          | Implementation Plan for "Thunder Action" of environmental law enforcement of Iron, Steel and Coal Industry of Hebei Province.                                                                                                                                                                                                                                                                                                                                                                                 | MEA | HEPA   | H72 |
| 2016 | 5 | 26 |          | Work Plan for Water Pollution Prevention and Control of Hebei Province.                                                                                                                                                                                                                                                                                                                                                                                                                                       | LPA | HEPA   | H73 |
| 2016 | 8 | 30 | H73      | Hundred-day Battle of Water Pollution Prevention and Control of Hebei Province.                                                                                                                                                                                                                                                                                                                                                                                                                               | MEA | HEPA   | H74 |

|                                                                                         |    |    |                       |                                                                                                                         |                |                                                                                                                                                                                  |              |
|-----------------------------------------------------------------------------------------|----|----|-----------------------|-------------------------------------------------------------------------------------------------------------------------|----------------|----------------------------------------------------------------------------------------------------------------------------------------------------------------------------------|--------------|
| 2016                                                                                    | 9  | 14 |                       | Measures for the Third-Party Management of Environmental Pollution in Hebei Province.                                   | LPA            | HP                                                                                                                                                                               | H75          |
| 2016                                                                                    | 11 | 17 | H51                   | Special Campaign of "Cracking down Environmental Pollution Crimes in 2016" of Hebei Province.                           | MEA            | HPSB<br>HEPA<br>HPP<br>HPC                                                                                                                                                       | H76          |
| Appendix 2: Environmental Governance Actions in Yangtze River Delta Urban Agglomeration |    |    |                       |                                                                                                                         |                |                                                                                                                                                                                  |              |
| Event time<br>(year-month-day)                                                          |    |    | Preorder<br>event no. | Event name and description                                                                                              | Action<br>type | Actors involved                                                                                                                                                                  | Event<br>no. |
| Part A: Joint actions at the agglomeration level                                        |    |    |                       |                                                                                                                         |                |                                                                                                                                                                                  |              |
| 1992                                                                                    | 12 | 1  |                       | Establish a joint meeting system of directors of the collaboration departments of 15 cities in the Yangtze River Delta. | IJA            | SH Mayor<br>WX Mayor<br>NB Mayor<br>ZS Mayor<br>SZ Mayor<br>YZ Mayor<br>HZ Mayor<br>SX Mayor<br>NJ Major<br>NT Mayor<br>TZ Mayor<br>CZ Mayor<br>HZ Mayor<br>JX Mayor<br>ZJ Mayor | Y1           |
| 1997                                                                                    | 12 | 1  | Y1                    | The 1st Forum for the Coordination of Urban Economy of the Yangtze River Delta.                                         | IJA            | SH Mayor<br>WX Mayor<br>NB Mayor<br>ZS Mayor<br>SZ Mayor<br>YZ Mayor<br>HZ Mayor                                                                                                 | Y2           |

|      |   |    |    |                                                                                                      |     |                                                                                                                                                                                  |    |
|------|---|----|----|------------------------------------------------------------------------------------------------------|-----|----------------------------------------------------------------------------------------------------------------------------------------------------------------------------------|----|
|      |   |    |    |                                                                                                      |     | SX Mayor<br>NJ Major<br>NT Mayor<br>TZ Mayor<br>CZ Mayor<br>HZ Mayor<br>JX Mayor<br>ZJ Mayor                                                                                     |    |
| 1999 | 5 | 6  | Y2 | The 2nd Forum for the Coordination of Urban Economy of the Yangtze River Delta was held in Hangzhou. | IJA | SH Mayor<br>WX Mayor<br>NB Mayor<br>ZS Mayor<br>SZ Mayor<br>YZ Mayor<br>HZ Mayor<br>SX Mayor<br>NJ Major<br>NT Mayor<br>TZ Mayor<br>CZ Mayor<br>HZ Mayor<br>JX Mayor<br>ZJ Mayor | Y3 |
| 2001 | 4 | 26 | Y3 | The 3rd Forum for the Coordination of Urban Economy of the Yangtze River Delta was held in Shaoxing. | IJA | SH Mayor<br>WX Mayor<br>NB Mayor<br>ZS Mayor<br>SZ Mayor<br>YZ Mayor<br>HZ Mayor<br>SX Mayor<br>NJ Major<br>NT Mayor                                                             | Y4 |

|      |    |    |    |                                                                                                      |     |                                                                                                                                                                                  |    |
|------|----|----|----|------------------------------------------------------------------------------------------------------|-----|----------------------------------------------------------------------------------------------------------------------------------------------------------------------------------|----|
|      |    |    |    |                                                                                                      |     | TZ Mayor<br>CZ Mayor<br>HZ Mayor<br>JX Mayor<br>ZJ Mayor                                                                                                                         |    |
| 2003 | 8  | 15 | Y4 | The 4th Forum for the Coordination of Urban Economy of the Yangtze River Delta was held in Nanjing.  | IJA | SH Mayor<br>WX Mayor<br>NB Mayor<br>ZS Mayor<br>SZ Mayor<br>YZ Mayor<br>HZ Mayor<br>SX Mayor<br>NJ Major<br>NT Mayor<br>TZ Mayor<br>CZ Mayor<br>HZ Mayor<br>JX Mayor<br>ZJ Mayor | Y5 |
| 2004 | 11 | 2  | Y5 | The 5th Forum for the Coordination of Urban Economy of the Yangtze River Delta was held in Shanghai. | IJA | SH Mayor<br>WX Mayor<br>NB Mayor<br>ZS Mayor<br>SZ Mayor<br>YZ Mayor<br>HZ Mayor<br>SX Mayor<br>NJ Major<br>NT Mayor<br>TZ Mayor<br>CZ Mayor<br>HZ Mayor                         | Y6 |

|      |    |    |    |                                                                                                     |     |                                                                                                                                                                                  |    |
|------|----|----|----|-----------------------------------------------------------------------------------------------------|-----|----------------------------------------------------------------------------------------------------------------------------------------------------------------------------------|----|
|      |    |    |    |                                                                                                     |     | JX Mayor<br>ZJ Mayor                                                                                                                                                             |    |
| 2005 | 10 | 22 | Y6 | The 6th Forum for the Coordination of Urban Economy of the Yangtze River Delta was held in Nantong. | IJA | SH Mayor<br>WX Mayor<br>NB Mayor<br>ZS Mayor<br>SZ Mayor<br>YZ Mayor<br>HZ Mayor<br>SX Mayor<br>NJ Major<br>NT Mayor<br>TZ Mayor<br>CZ Mayor<br>HZ Mayor<br>JX Mayor<br>ZJ Mayor | Y7 |
| 2005 | 12 | 25 | Y7 | The 1st main leadership forum of the Yangtze River Delta Region was held in Hangzhou.               | IJA | SH Mayor<br>WX Mayor<br>NB Mayor<br>ZS Mayor<br>SZ Mayor<br>YZ Mayor<br>HZ Mayor<br>SX Mayor<br>NJ Major<br>NT Mayor<br>TZ Mayor<br>CZ Mayor<br>HZ Mayor<br>JX Mayor<br>ZJ Mayor | Y8 |

|      |    |    |    |                                                                                                       |     |                                                                                                                                                                                  |     |
|------|----|----|----|-------------------------------------------------------------------------------------------------------|-----|----------------------------------------------------------------------------------------------------------------------------------------------------------------------------------|-----|
| 2006 | 11 | 24 | Y9 | The 7th Forum for the Coordination of Urban Economy of the Yangtze River Delta was held in Taizhou.   | IJA | SH Mayor<br>WX Mayor<br>NB Mayor<br>ZS Mayor<br>SZ Mayor<br>YZ Mayor<br>HZ Mayor<br>SX Mayor<br>NJ Major<br>NT Mayor<br>TZ Mayor<br>CZ Mayor<br>HZ Mayor<br>JX Mayor<br>ZJ Mayor | Y9  |
| 2007 | 12 | 11 | Y9 | The 8th Forum for the Coordination of Urban Economy of the Yangtze River Delta was held in Changzhou. | IJA | SH Mayor<br>WX Mayor<br>NB Mayor<br>ZS Mayor<br>SZ Mayor<br>YZ Mayor<br>HZ Mayor<br>SX Mayor<br>NJ Major<br>NT Mayor<br>TZ Mayor<br>CZ Mayor<br>HZ Mayor<br>JX Mayor<br>ZJ Mayor | Y10 |
| 2008 | 12 | 1  | Y8 | The 2nd main leadership forum of the Yangtze River Delta Region was held in Ningbo.                   | IJA | JS Party<br>secretary<br>ZJ Party                                                                                                                                                | Y11 |

|      |    |    |     |                                                                                                                                                                                                                                                                                                                                                                                                 |     |                                                                                                                                                                                  |     |
|------|----|----|-----|-------------------------------------------------------------------------------------------------------------------------------------------------------------------------------------------------------------------------------------------------------------------------------------------------------------------------------------------------------------------------------------------------|-----|----------------------------------------------------------------------------------------------------------------------------------------------------------------------------------|-----|
|      |    |    |     |                                                                                                                                                                                                                                                                                                                                                                                                 |     | secretary<br>SH Party<br>secretary<br>JS governor<br>ZJ governor<br>SH mayor                                                                                                     |     |
| 2008 | 12 | 15 | Y11 | The responsible personnel of environmental protection departments of Jiangsu Province, Zhejiang Province and Shanghai City signed the Agreement on Yangtze River Delta Regional Environmental Protection Cooperation (2009-2010) in Suzhou, deciding to jointly take a series of environmental protection measures to enhance the environmental management level of Yangtze River Delta region. | FJA | JSEPA<br>ZJEP<br>SHEPA                                                                                                                                                           | Y12 |
| 2009 | 3  | 1  | Y11 | Establish the Yangtze River Delta Cooperation and Development Joint Conference Office.                                                                                                                                                                                                                                                                                                          | FJA | JSEPA<br>ZJEP<br>SHEPA<br>ANEPA                                                                                                                                                  | Y13 |
| 2009 | 3  | 27 | Y10 | The 9th Forum for the Coordination of Urban Economy of the Yangtze River Delta was held in Huzhou.                                                                                                                                                                                                                                                                                              | IJA | SH Mayor<br>WX Mayor<br>NB Mayor<br>ZS Mayor<br>SZ Mayor<br>YZ Mayor<br>HZ Mayor<br>SX Mayor<br>NJ Mayor<br>NT Mayor<br>TZ Mayor<br>CZ Mayor<br>HZ Mayor<br>JX Mayor<br>ZJ Mayor | Y14 |

|      |    |    |          |                                                                                                                                                                                                                                                                                                |     |                                                                                                                                                                                                                |     |
|------|----|----|----------|------------------------------------------------------------------------------------------------------------------------------------------------------------------------------------------------------------------------------------------------------------------------------------------------|-----|----------------------------------------------------------------------------------------------------------------------------------------------------------------------------------------------------------------|-----|
| 2009 | 7  | 31 | Y12, Y14 | Implementation Measures for Environmental Behavior Information Disclosure Work of the Enterprises in the Yangtze River Delta Region (Interim).<br>Information Evaluation Criteria of Environmental Behavior Information of the Enterprises in Yangtze River Delta Region Enterprise (Interim). | FJA | JSEPA<br>ZJEP<br>SHEPA                                                                                                                                                                                         | Y15 |
| 2009 | 8  | 31 | Y13      | The 1st Yangtze River Delta Regional Cooperation and Development Joint Meeting was held in Wuxi, Jiangsu.                                                                                                                                                                                      | IJA | SH mayor<br>ZJ governor<br>JS governor<br>AH governor<br>ZJDRC director<br>JSDRC director<br>SHDRC director<br>YRDUECM<br>JS Party secretary<br>ZJ Party secretary<br>SH Party secretary<br>AH Party secretary | Y16 |
| 2009 | 12 | 17 | Y11, Y12 | The 1st Yangtze River Delta Environmental Protection Cooperation Joint Meeting was held in Tongxiang City, Zhejiang Province, marking the Yangtze River Delta environmental protection cooperation into the substantive operating stage.                                                       | IJA | JSEPA<br>ZJEP<br>SHEPA                                                                                                                                                                                         | Y17 |
| 2010 | 3  | 26 | Y14      | The 10th Forum for the Coordination of Urban Economy of the Yangtze River Delta was held in Jiaxing.                                                                                                                                                                                           | IJA | SH Mayor<br>WX Mayor<br>NB Mayor<br>ZS Mayor<br>SZ Mayor<br>YZ Mayor<br>HZ Mayor<br>SX Mayor<br>NJ Mayor                                                                                                       | Y18 |

|      |    |    |     |                                                                                                        |     |                                                                                                                                                                                                                            |     |
|------|----|----|-----|--------------------------------------------------------------------------------------------------------|-----|----------------------------------------------------------------------------------------------------------------------------------------------------------------------------------------------------------------------------|-----|
|      |    |    |     |                                                                                                        |     | NT Mayor<br>TZ Mayor<br>CZ Mayor<br>HZ Mayor<br>JX Mayor<br>ZJ Mayor                                                                                                                                                       |     |
| 2010 | 6  | 22 |     | Regional Development Plan for the Yangtze River Delta Region.                                          | FJA | NDRC<br>JSP<br>ZJP<br>SHG                                                                                                                                                                                                  | Y19 |
| 2010 | 10 | 13 | Y16 | The 2nd Yangtze River Delta Environmental Protection Cooperation Joint Meeting was held in Shanghai.   | IJA | SH mayor<br>ZJ governor<br>JS governor<br>AH governor<br>ZJDRC director<br>JSDRC director<br>SHDRC director<br>YRDUECM<br>JS Party<br>secretary<br>ZJ Party<br>secretary<br>SH Party<br>secretary<br>AH Party<br>secretary | Y20 |
| 2011 | 3  | 31 | Y18 | The 11th Forum for the Coordination of Urban Economy of the Yangtze River Delta was held in Zhenjiang. | IJA | SH Mayor<br>WX Mayor<br>NB Mayor<br>ZS Mayor<br>SZ Mayor<br>YZ Mayor<br>HZ Mayor                                                                                                                                           | Y21 |

|      |   |    |     |                                                                                                                       |     |                                                                                                                                                                                                                |     |
|------|---|----|-----|-----------------------------------------------------------------------------------------------------------------------|-----|----------------------------------------------------------------------------------------------------------------------------------------------------------------------------------------------------------------|-----|
|      |   |    |     |                                                                                                                       |     | SX Mayor<br>NJ Major<br>NT Mayor<br>TZ Mayor<br>CZ Mayor<br>HZ Mayor<br>JX Mayor<br>ZJ Mayor                                                                                                                   |     |
| 2011 | 9 | 20 | Y20 | The 3rd Yangtze River Delta Environmental Protection Cooperation Joint Meeting was held in Wuhu City, Anhui Province. | IJA | SH mayor<br>ZJ governor<br>JS governor<br>AH governor<br>ZJDRC director<br>JSDRC director<br>SHDRC director<br>YRDUECM<br>JS Party secretary<br>ZJ Party secretary<br>SH Party secretary<br>AH Party secretary | Y22 |

|      |    |    |     |                                                                                                      |     |                                                                                                                                                                                                                       |     |
|------|----|----|-----|------------------------------------------------------------------------------------------------------|-----|-----------------------------------------------------------------------------------------------------------------------------------------------------------------------------------------------------------------------|-----|
| 2011 | 11 | 20 | Y11 | The 3rd main leadership forum of the Yangtze River Delta Region was held in Hefei, Anhui Province.   | IJA | SH mayor<br>ZJ governor<br>JS governor<br>AH governor<br>ZJDRC director<br>JSDRC director<br>SHDRC director<br>AHDRC director<br>JS Party secretary<br>ZJ Party secretary<br>SH Party secretary<br>AH Party secretary | Y23 |
| 2012 | 4  | 17 | Y21 | The 12th Forum for the Coordination of Urban Economy of the Yangtze River Delta was held in Taizhou. | IJA | SH Mayor<br>WX Mayor<br>NB Mayor<br>ZS Mayor<br>SZ Mayor<br>YZ Mayor<br>HZ Mayor<br>SX Mayor<br>NJ Mayor<br>NT Mayor<br>TZ Mayor<br>CZ Mayor<br>HZ Mayor<br>JX Mayor<br>ZJ Mayor                                      | Y24 |

|      |    |    |     |                                                                                                                                                                                                                                                          |     |                                                                                                                                                                                  |     |
|------|----|----|-----|----------------------------------------------------------------------------------------------------------------------------------------------------------------------------------------------------------------------------------------------------------|-----|----------------------------------------------------------------------------------------------------------------------------------------------------------------------------------|-----|
| 2012 | 5  | 8  | Y17 | The 2nd Yangtze River Delta Environmental Protection Cooperation Joint Meeting was held in Longquan City, Zhejiang Province.                                                                                                                             | IJA | JSEPA<br>ZJEP<br>SHEPA                                                                                                                                                           | Y25 |
| 2012 | 9  | 21 | Y23 | The 4th main leadership forum of the Yangtze River Delta Region was held in Chun'an County, Hangzhou.                                                                                                                                                    | IJA | CPC Politburo<br>ZJ governor<br>JS governor<br>AH governor<br>SH Mayor<br>JS Party<br>secretary<br>ZJ Party<br>secretary<br>SH Party<br>secretary<br>AH Party<br>secretary       | Y26 |
| 2013 | 4  | 13 | Y24 | The 13th Forum for the Coordination of Urban Economy of the Yangtze River Delta was held in Hefei, Anhui Province, with the theme of "new dividends of Yangtze River Delta urban agglomeration integrated development - innovation, green, integration." | IJA | SH Mayor<br>WX Mayor<br>NB Mayor<br>ZS Mayor<br>SZ Mayor<br>YZ Mayor<br>HZ Mayor<br>SX Mayor<br>NJ Mayor<br>NT Mayor<br>TZ Mayor<br>CZ Mayor<br>HZ Mayor<br>JX Mayor<br>ZJ Mayor | Y27 |
| 2013 | 10 | 31 | Y22 | The 4th Yangtze River Delta Environmental Protection Cooperation Joint Meeting was held in Nantong with the theme of "linking the implementation                                                                                                         | IJA | SH mayor<br>ZJ governor                                                                                                                                                          | Y28 |

|      |    |    |     |                                                                                                                                                        |     |                                                                                                                                                                                                       |     |
|------|----|----|-----|--------------------------------------------------------------------------------------------------------------------------------------------------------|-----|-------------------------------------------------------------------------------------------------------------------------------------------------------------------------------------------------------|-----|
|      |    |    |     | of national strategy and jointly promoting innovation and development” and the main line of “Yangtze River Delta region transformation and upgrading”. |     | JS governor<br>AH governor<br>ZJDRC director<br>JSDRC director<br>SHDRC director<br>AHDRC director<br>YRDUECM<br>JS Party secretary<br>ZJ Party secretary<br>SH Party secretary<br>AH Party secretary |     |
| 2013 | 12 | 18 | Y26 | The 5th main leadership forum of the Yangtze River Delta Region was held in Nanjing, Jiangsu Province.                                                 | IJA | SH mayor<br>ZJ governor<br>JS governor<br>AH governor<br>JS Party secretary<br>ZJ Party secretary<br>SH Party secretary<br>AH Party secretary                                                         | Y29 |
| 2014 | 1  | 7  |     | The 1st Work Conference of the Air Pollution Prevention and Control Mechanism of the Yangtze River Delta Region was held in Shanghai.                  | IJA | MOEP<br>SC<br>MOIIT<br>NDRC<br>MOF<br>MOHURC                                                                                                                                                          | Y30 |

|      |   |    |     |                                                                                                                                                                                                                                                                           |     |                                                                                                                                                                                  |     |
|------|---|----|-----|---------------------------------------------------------------------------------------------------------------------------------------------------------------------------------------------------------------------------------------------------------------------------|-----|----------------------------------------------------------------------------------------------------------------------------------------------------------------------------------|-----|
|      |   |    |     |                                                                                                                                                                                                                                                                           |     | MOT<br>CMA<br>NEA<br>SHG<br>JSP<br>ZJP<br>ANP                                                                                                                                    |     |
| 2014 | 3 | 29 | Y27 | The 14th Forum for the Coordination of Urban Economy of the Yangtze River Delta was held in Yancheng, Jiangsu Province.                                                                                                                                                   | IJA | SH Mayor<br>WX Mayor<br>NB Mayor<br>ZS Mayor<br>SZ Mayor<br>YZ Mayor<br>HZ Mayor<br>SX Mayor<br>NJ Major<br>NT Mayor<br>TZ Mayor<br>CZ Mayor<br>HZ Mayor<br>JX Mayor<br>ZJ Mayor | Y31 |
| 2014 | 7 | 21 | Y30 | The 2nd meeting of Air Pollution Prevention and Control Cooperative Group Office of Yangtze River Delta Region was held in Nanjing, Jiangsu Province, focusing on the deployment of regional cooperation to protect the Nanjing Olympic Games environmental quality work. | IJA | MOEP<br>SC<br>MOIIT<br>NDRC<br>MOF<br>MOHURC<br>MOT<br>CMA<br>NEA<br>SHG<br>JSP                                                                                                  | Y32 |

|      |    |    |     |                                                                                                                                  |     |                                                                                                                                          |     |
|------|----|----|-----|----------------------------------------------------------------------------------------------------------------------------------|-----|------------------------------------------------------------------------------------------------------------------------------------------|-----|
|      |    |    |     |                                                                                                                                  |     | ZJP<br>ANP                                                                                                                               |     |
| 2014 | 9  | 25 | Y28 | The 5th Yangtze River Delta Regional Cooperation and Development Joint Meeting was held in Shanghai.                             | IJA | SH mayor<br>ZJ governor<br>JS governor<br>AH governor<br>ZJDRC director<br>JSDRC director<br>SHDRC director<br>AHDRC director<br>YRDUECM | Y33 |
| 2014 | 12 | 1  | Y32 | The 3rd Work Conference of the Yangtze River Delta Regional Air Pollution Prevention and Control Mechanism was held in Shanghai. | IJA | MOEP<br>SC<br>MOIIT<br>NDRC<br>MOF<br>MOHURC<br>MOT<br>CMA<br>NEA<br>SHG<br>JSP<br>ZJP<br>ANP                                            | Y34 |
| 2014 | 12 | 1  | Y34 | Establish the Yangtze River Delta Regional Air Quality Forecasting Center.                                                       | FJA | JSEPA<br>ZJEP<br>SHEPA<br>ANEPA                                                                                                          | Y35 |
| 2014 | 12 | 2  | Y29 | The 6th main leadership forum of the Yangtze River Delta Region was held in Shanghai.                                            | IJA | ZJ governor<br>JS governor<br>AH governor<br>SH mayor<br>JS Party                                                                        | Y36 |

|      |   |    |     |                                                                                                                                                                                                                                                                                                                                                                                                                                                                                   |     |                                                                                                                                                                                  |     |
|------|---|----|-----|-----------------------------------------------------------------------------------------------------------------------------------------------------------------------------------------------------------------------------------------------------------------------------------------------------------------------------------------------------------------------------------------------------------------------------------------------------------------------------------|-----|----------------------------------------------------------------------------------------------------------------------------------------------------------------------------------|-----|
|      |   |    |     |                                                                                                                                                                                                                                                                                                                                                                                                                                                                                   |     | secretary<br>ZJ Party<br>secretary<br>SH Party<br>secretary<br>AH Party<br>secretary                                                                                             |     |
| 2015 | 3 | 26 | Y31 | The 15th Forum for the Coordination of Urban Economy of the Yangtze River Delta was held in Ma'anshan City, Anhui Province.                                                                                                                                                                                                                                                                                                                                                       | IJA | SH Mayor<br>WX Mayor<br>NB Mayor<br>ZS Mayor<br>SZ Mayor<br>YZ Mayor<br>HZ Mayor<br>SX Mayor<br>NJ Major<br>NT Mayor<br>TZ Mayor<br>CZ Mayor<br>HZ Mayor<br>JX Mayor<br>ZJ Mayor | Y37 |
| 2015 | 4 | 21 | Y34 | The 4th meeting of Air Pollution Prevention and Control Cooperative Group Office of Yangtze River Delta Region was held in Hangzhou.                                                                                                                                                                                                                                                                                                                                              | IJA | MOEP<br>SH mayor<br>ZJ governor<br>JS governor<br>AH governor                                                                                                                    | Y38 |
| 2015 | 9 | 11 | Y38 | The Air Pollution Prevention and Control Cooperative Group Office of Yangtze River Delta Region issued the Action Plan for Jointly Promoting High-pollution Vehicle Environmental Management of Yangtze River Delta Region, Action Plan for Jointly Promoting the Port and Ship Air Pollution Prevention and Control of the Yangtze River Delta Region, Plan for Nonlocal Joint Supervision of Yellow Label Car of Yangtze River Delta Region, Recommendations for Ship Pollution | FJA | YRDAPCLG                                                                                                                                                                         | Y39 |

|      |    |    |     |                                                                                                                                                                                                                                                                                 |     |                                                                                                                                                                                                                         |     |
|------|----|----|-----|---------------------------------------------------------------------------------------------------------------------------------------------------------------------------------------------------------------------------------------------------------------------------------|-----|-------------------------------------------------------------------------------------------------------------------------------------------------------------------------------------------------------------------------|-----|
|      |    |    |     | Prevention and Control, Recommendations for Non-road Mobile Machinery Pollution Prevention and Control.                                                                                                                                                                         |     |                                                                                                                                                                                                                         |     |
| 2015 | 10 | 16 | Y38 | The 5th meeting of Air Pollution Prevention and Control Cooperative Group Office of Yangtze River Delta Region was held in Hefei, which researched and prepared the annual meeting of the collaboration group to promote the implementation of the 2015 key collaboration work. | IJA | MOEP<br>SH mayor<br>ZJ governor<br>JS governor<br>AH governor<br>JS Party secretary<br>ZJ Party secretary<br>SH Party secretary<br>AH Party secretary                                                                   | Y40 |
| 2015 | 10 | 18 | Y33 | The 6th Yangtze River Delta Regional Cooperation and Development Joint Meeting was held in Ma'anshan.                                                                                                                                                                           | IJA | SH mayor<br>ZJ mayor<br>JS mayor<br>AH mayor<br>ZJDRC director<br>JSDRC director<br>SHDRC director<br>ANDRC director<br>YRDUECM<br>JS Party secretary<br>ZJ Party secretary<br>SH Party secretary<br>AH Party secretary | Y41 |

|      |    |    |     |                                                                                                                                                                                                                                   |     |                                                                                                                                                                                                                                                            |     |
|------|----|----|-----|-----------------------------------------------------------------------------------------------------------------------------------------------------------------------------------------------------------------------------------|-----|------------------------------------------------------------------------------------------------------------------------------------------------------------------------------------------------------------------------------------------------------------|-----|
| 2015 | 12 | 2  | Y38 | The 5th Work Conference of the Yangtze River Delta Regional Air Pollution Prevention and Control Mechanism was held in Hefei.                                                                                                     | IJA | MOEP<br>SC<br>MOIIT<br>NDRC<br>MOF<br>MOHURC<br>MOT<br>CMA<br>NEA<br>SHG<br>JSP<br>ZJP<br>ANP<br>JS Party<br>secretary<br>ZJ Party<br>secretary<br>SH Party<br>secretary<br>AH Party<br>secretary<br>SH mayor<br>ZJ governor<br>JS governor<br>AH governor | Y42 |
| 2016 | 3  | 24 | Y37 | The 16th Forum for the Coordination of Urban Economy of the Yangtze River Delta was held in Jinhua City, Zhejiang Province, with the theme of the meeting, “the Internet + Yangtze River Delta city cooperation and development”. | IJA | SH Mayor<br>WX Mayor<br>NB Mayor<br>ZS Mayor<br>SZ Mayor<br>YZ Mayor<br>HZ Mayor<br>SX Mayor                                                                                                                                                               | Y43 |

|      |    |    |     |                                                                                                                                                                                                                                                                                                                                                                                                                                           |     |                                                                                               |     |
|------|----|----|-----|-------------------------------------------------------------------------------------------------------------------------------------------------------------------------------------------------------------------------------------------------------------------------------------------------------------------------------------------------------------------------------------------------------------------------------------------|-----|-----------------------------------------------------------------------------------------------|-----|
|      |    |    |     |                                                                                                                                                                                                                                                                                                                                                                                                                                           |     | NJ Major<br>NT Mayor<br>TZ Mayor<br>CZ Mayor<br>HZ Mayor<br>JX Mayor<br>ZJ Mayor              |     |
| 2016 | 4  | 21 | Y42 | The 6th meeting of Air Pollution Prevention and Control Cooperative Group Office of Yangtze River Delta Region was held in Hangzhou, Zhejiang Province.                                                                                                                                                                                                                                                                                   | IJA | MOEP<br>ZJ governor                                                                           | Y44 |
| 2016 | 5  | 11 |     | Yangtze River Delta Urban Agglomeration Development Plan.                                                                                                                                                                                                                                                                                                                                                                                 | FJA | NDRC<br>SHG<br>JSP<br>ZJP<br>ANP                                                              | Y45 |
| 2016 | 11 | 10 | Y44 | The 7th meeting of Air Pollution Prevention and Control Cooperative Group Office of Yangtze River Delta Region was held in Shanghai to promote the implementation of the 2016 collaboration key work, to study and prepare the annual meeting and 2017 collaboration key work of Air and Water Pollution Prevention and Control Cooperation Group of the Yangtze River Delta Region (hereinafter referred to as the collaboration group). | IJA | MOEP<br>SC<br>MOIIT<br>NDRC<br>MOF<br>MOHURC<br>MOT<br>CMA<br>NEA<br>SHG<br>JSP<br>ZJP<br>ANP | Y46 |
| 2016 | 11 | 13 | Y41 | The 7th Yangtze River Delta Regional Cooperation and Development Joint Meeting was held in Hangzhou.                                                                                                                                                                                                                                                                                                                                      | IJA | SH mayor<br>ZJ governor<br>JS governor<br>AH governor<br>ZJDRC director<br>JSDRC director     | Y47 |

|                                               |    |    |        |                                                                                                                  |     |                                                                                                                                                                            |     |
|-----------------------------------------------|----|----|--------|------------------------------------------------------------------------------------------------------------------|-----|----------------------------------------------------------------------------------------------------------------------------------------------------------------------------|-----|
|                                               |    |    |        |                                                                                                                  |     | SHDRC director<br>ANDRC director<br>YRDUECM<br>JS Party<br>secretary<br>ZJ Party<br>secretary<br>SH Party<br>secretary<br>AH Party<br>secretary                            |     |
| 2016                                          | 11 | 24 |        | 2016 Annual Cross-border Environmental Emergency Linkage Work Conference of Yangtze River Delta Region was held. | IJA | JSEPA                                                                                                                                                                      | Y48 |
| 2016                                          | 12 | 8  | Y36    | The 7th main leadership forum of the Yangtze River Delta Region was held in Hangzhou.                            | IJA | CPC Politburo<br>ZJ governor<br>JS governor<br>AH governor<br>SH Mayor<br>JS Party<br>secretary<br>ZJ Party<br>secretary<br>SH Party<br>secretary<br>AH Party<br>secretary | Y49 |
| <b>Part B: Autonomous actions in Shanghai</b> |    |    |        |                                                                                                                  |     |                                                                                                                                                                            |     |
| 2003                                          | 11 | 3  | Y5     | Regulations on Key Environmental Protection Supervision Enterprises in Shanghai.                                 | LPA | SHEPA                                                                                                                                                                      | S1  |
| 2003                                          | 11 | 6  | S1, Y5 | Provisions on Real-time Automatic Monitoring of Major Pollutant Emissions in Shanghai.                           | LPA | SHEPA                                                                                                                                                                      | S2  |
| 2004                                          | 5  | 15 | Y5     | Provisions on the Prevention and Control of Dust Pollution in Shanghai.                                          | LPA | SHEPA                                                                                                                                                                      | S3  |

|      |    |    |            |                                                                                                                                                                                                                                                                                                                                                                                             |     |                |     |
|------|----|----|------------|---------------------------------------------------------------------------------------------------------------------------------------------------------------------------------------------------------------------------------------------------------------------------------------------------------------------------------------------------------------------------------------------|-----|----------------|-----|
| 2006 | 4  | 39 | S1, Y5, Y8 | Shanghai Environmental Protection Bureau convened the conference on environmental supervision for Shanghai Cooperation Organization Summit, and all Shanghai Environmental Protection Bureaus formulated “629” Environmental Improvement Program for Shanghai Cooperation Organization Summit, took actions right away and deployed and carried out various environmental remediation work. | LPA | SHEPA          | S4  |
| 2008 | 6  | 25 | S2         | With the establishment of sewage treatment plant on-line monitoring system in Shanghai, all sewage treatment plants constructed and under construction shall install on-line monitoring equipment as stipulated and be networked with the monitoring center of environmental protection department.                                                                                         | MEA | SHEPA          | S5  |
| 2009 | 6  | 1  | S4         | The inner divisions of Shanghai Environmental Monitoring Center were adjusted to “six divisions and one office” from original “five divisions and one office”, with “Comprehensive Law Enforcement Division” added to strengthen the investigation and handling of major environmental cases.                                                                                               | MEA | SEMC           | S6  |
| 2009 | 6  | 1  | S6         | Special inspection of the heavy polluting enterprises in the high energy consumption, high pollution and resource industry and the arsenic- and steel-related industry.                                                                                                                                                                                                                     | MEA | SEMC           | S7  |
| 2009 | 6  | 21 | S2         | Fang Fang and Wu Qizhou, Deputy Directors of Shanghai Environmental Protection Bureau carried out a survey of the information construction of Shanghai Municipal Environmental Monitoring Corps with the information survey team consisting of Pollution Control Center, Planning Office, Law Office and Information Center of Shanghai Environmental Protection Bureau.                    | PA  | SHEPA director | S8  |
| 2009 | 7  | 1  | S6         | Shanghai Municipal Environmental Monitoring Corps launched environmental protection special action in Baoshan big field area.                                                                                                                                                                                                                                                               | MEA | SEMC           | S9  |
| 2009 | 8  | 21 | S6         | Special law enforcement inspection in the second industrial zone of Shanghai Jinshan.                                                                                                                                                                                                                                                                                                       | MEA | SEMC           | S10 |
| 2009 | 12 | 10 | Y16        | Regulations on the Protection of Drinking Water Sources in Shanghai.                                                                                                                                                                                                                                                                                                                        | LPA | SPC            | S11 |
| 2010 | 1  | 13 | Y17        | Shanghai Environmental Protection Bureau, Shanghai Environmental Protection Bureau Director Zhang Quan, Deputy Director Wu Qizhou led the Bureau Office, Total Department, Pollution Department, Regulations department and leaders of water department to conduct annual work research.                                                                                                    | PA  | SHEPA director | S12 |

|      |    |    |     |                                                                                                                                                                                                                                                                                                                                                                                                                                                                                                                                                                                       |     |                                                                                                     |     |
|------|----|----|-----|---------------------------------------------------------------------------------------------------------------------------------------------------------------------------------------------------------------------------------------------------------------------------------------------------------------------------------------------------------------------------------------------------------------------------------------------------------------------------------------------------------------------------------------------------------------------------------------|-----|-----------------------------------------------------------------------------------------------------|-----|
| 2010 | 2  | 9  | Y17 | Shanghai Municipal Environmental Monitoring Corps successfully completed the 2009 environmental monitoring work of environmental comprehensive improvement project in Wujing Industrial Zone.                                                                                                                                                                                                                                                                                                                                                                                         | MEA | SEMC                                                                                                | S13 |
| 2010 | 7  | 14 | Y17 | Executive Vice Mayor of Shanghai Yang Xiong, Vice Mayor Shen Jun held a workshop to listen to the city's environmental protection and ecological construction "Twelfth Five-Year Plan" report, Secretary Zhou Bo and Deputy Secretary Yin Hong attended the meeting.                                                                                                                                                                                                                                                                                                                  | PA  | SH mayor<br>SHEPA director<br>SHDRC director<br>SHEITC director<br>SHHURD director<br>SHAB director | S14 |
| 2011 | 1  | 26 | Y17 | Vice Mayor of Shanghai Shen Jun went to the Municipal Environmental Protection Bureau to research "The Twelfth Five-Year Plan" and environmental protection work in 2011, carefully listened to the Director Zhang' report on the city's "The Eleventh Five-Year Plan" and the 2010 key work progress, the overall consideration of "The Twelfth Five-Year Plan" and the main work arrangements this year, studied and analyzed the current situation and the difficulties in the advancement of work, and put forward a clear request for the next step in environmental protection. | PA  | SHEPA director                                                                                      | S15 |
| 2011 | 6  | 29 | Y17 | Shanghai Municipal Environmental Inspection Corps organized a joint inspection of straw burning.                                                                                                                                                                                                                                                                                                                                                                                                                                                                                      | MEA | SEMC                                                                                                | S16 |
| 2011 | 8  | 25 | Y17 | Shanghai Environmental Protection Bureau, Shanghai Environmental Protection Bureau Deputy Director Wu Qizhou and bureau investigator Zhang Long went to the Corps to carry out research on the environmental emergency hotline work.                                                                                                                                                                                                                                                                                                                                                  | PA  | SHEPA director                                                                                      | S17 |
| 2011 | 11 | 29 | Y23 | Shanghai Environmental Protection Bureau Director Zhang Quan, Deputy Director Wu Qizhou led the leaders of Bureau office, Regulations Department and other leaders to the Corps to conduct annual work research.                                                                                                                                                                                                                                                                                                                                                                      | PA  | SHEPA director                                                                                      | S18 |
| 2011 | 12 | 16 | Y23 | Shanghai Vice Mayor Shen Jun and his entourage went to the city Environmental Monitoring Center to develop research, and study the city's environmental monitoring work.                                                                                                                                                                                                                                                                                                                                                                                                              | PA  | SHEPA director                                                                                      | S19 |
| 2012 | 5  | 21 | Y25 | Shanghai Environmental Inspection Corps organized a special survey for tail water treatment in waterworks.                                                                                                                                                                                                                                                                                                                                                                                                                                                                            | MEA | SEMC                                                                                                | S20 |

|      |    |    |     |                                                                                                                                                                                                                                                                                                                                                                                                                                                                                                                                                                                                                                                            |     |                                                                                                     |     |
|------|----|----|-----|------------------------------------------------------------------------------------------------------------------------------------------------------------------------------------------------------------------------------------------------------------------------------------------------------------------------------------------------------------------------------------------------------------------------------------------------------------------------------------------------------------------------------------------------------------------------------------------------------------------------------------------------------------|-----|-----------------------------------------------------------------------------------------------------|-----|
| 2012 | 7  | 17 | Y25 | Shanghai Environmental Protection Bureau, Deputy Director of Shanghai Environmental Protection Bureau, Wu Qizhou, went to the City Environmental Monitoring Corps to carry out work research.                                                                                                                                                                                                                                                                                                                                                                                                                                                              | PA  | SHEPA director                                                                                      | S21 |
| 2012 | 7  | 27 | Y25 | Vice Mayor of Shanghai Shen Jun held work shop on the environmental protection three-year action plan promotion to deploy to promote the key environmental protection work of the second half of the year.                                                                                                                                                                                                                                                                                                                                                                                                                                                 | PA  | SH mayor<br>SHEPA director<br>SHDRC director<br>SHEITC director<br>SHHURD director<br>SHAB director | S22 |
| 2012 | 8  | 3  | Y25 | Shen Jun, Vice Mayor of Shanghai, visited the City Environmental Science Research Institute to conduct research, mainly inspected soil pollution control and repair engineering technology center and the compound air pollution research key laboratory and observation station of the national environmental protection city, and expressed sympathy for the front-line scientific research staff.                                                                                                                                                                                                                                                       | PA  | SHEPA director                                                                                      | S23 |
| 2012 | 9  | 1  | Y25 | Suggestions of Improvement and Implementation for High-polluting Automobile Elimination and Traffic Restriction in Shanghai.                                                                                                                                                                                                                                                                                                                                                                                                                                                                                                                               | LPA | SHEPA director<br>SHDRC director<br>SHTB director<br>SHFB director<br>SHPSB director                | S24 |
| 2012 | 11 | 4  | Y26 | Shanghai Environmental Protection Bureau, Shanghai Environmental Protection Bureau Deputy Director Wu Qizhou conducted research for the work of Shanghai chemical industry environmental supervision detachment.                                                                                                                                                                                                                                                                                                                                                                                                                                           | PA  | SHEPA director                                                                                      | S25 |
| 2012 | 11 | 6  | Y26 | Shanghai Vice Mayor Shen Jun went to the Municipal Environmental Protection Bureau to carry out special research on the recent key environmental protection and further consideration for the next five years, listened to the pollution reduction, environmental protection three-year action plan, PM2.5 monitoring and AQI release preparation and through innovation mechanism and strengthen the capacity construction to promote the development of transformation and strengthen the situation of environmental management, which made a deep discussion for problems of environmental constraints and high social concern and the public generally | PA  | SHEPA director                                                                                      | S26 |

|      |    |    |          |                                                                                                                                                                                                                                                                                                                                                                                                                                                                                                                                                                                                                                                                            |     |                |     |
|------|----|----|----------|----------------------------------------------------------------------------------------------------------------------------------------------------------------------------------------------------------------------------------------------------------------------------------------------------------------------------------------------------------------------------------------------------------------------------------------------------------------------------------------------------------------------------------------------------------------------------------------------------------------------------------------------------------------------------|-----|----------------|-----|
|      |    |    |          | concerned existing in development of the current transformation, and studied the corresponding policy measures.                                                                                                                                                                                                                                                                                                                                                                                                                                                                                                                                                            |     |                |     |
| 2012 | 11 | 26 | S21, Y26 | Shanghai Environmental Monitoring Corps carried out special inspection of sewage treatment plant.                                                                                                                                                                                                                                                                                                                                                                                                                                                                                                                                                                          | MEA | SEMC           | S27 |
| 2012 | 12 | 14 | S22, Y26 | Shanghai Environmental Inspection Corps and Solid Waste Management Center carried out special inspection of waste plastics processing industry.                                                                                                                                                                                                                                                                                                                                                                                                                                                                                                                            | MEA | SEMC           | S28 |
| 2012 | 12 | 17 | S22, Y26 | Shanghai Environmental Inspection Corps carried out special inspection work of air pollutants emission reduction of key industries.                                                                                                                                                                                                                                                                                                                                                                                                                                                                                                                                        | MEA | SEMC           | S29 |
| 2013 | 2  | 7  | Y26      | Shanghai Vice Mayor Jiang Ping conducted research work to the Municipal Environmental Protection Bureau, requiring scientific and objective evaluation, and recognizing the current environmental protection serious situation.                                                                                                                                                                                                                                                                                                                                                                                                                                            | PA  | SHEPA director | S30 |
| 2013 | 2  | 25 | Y26      | Shanghai Municipal People's Congress Deputy Director Xue Chao led the team to the Environmental Protection Agency to conduct research work.                                                                                                                                                                                                                                                                                                                                                                                                                                                                                                                                | PA  | SPC member     | S31 |
| 2013 | 3  | 28 | S2       | Provisions on Air Pollution Automatic Monitoring System Management of Key Industrial Parks of Shanghai.                                                                                                                                                                                                                                                                                                                                                                                                                                                                                                                                                                    | LPA | SHEPA          | S32 |
| 2013 | 4  | 10 | Y26      | Shanghai Environmental Monitoring Center Xuhui detachment started comprehensive environmental safety improvement action in Huajing harbor area.                                                                                                                                                                                                                                                                                                                                                                                                                                                                                                                            | MEA | SEMC           | S33 |
| 2013 | 4  | 22 | Y27      | Shanghai Environmental Protection Bureau, Shanghai Environmental Protection Bureau Deputy Director Fang Fang, Deputy Director Wu Qizhou led the entourages to the Corps to hold tender work promotion workshop of mobile law enforcement system. Deputy Director Wu Qizhou required the Corps to learn the successful experience from other provinces and municipalities environmental protection departments in the planning system construction process, proposed to take into account the previous step in the project construction, fully consider the business process convergence of the city and the Environmental Protection Bureau, achieve data interconnection. | PA  | SHEPA director | S34 |
| 2013 | 4  | 23 | Y27      | Shanghai Municipal People's Congress Deputy Director Xue Chao and his entourage went to the city Environmental Monitoring Center to research Shanghai PM2.5 monitoring release and prevention work of, inspected the ambient air flow monitoring car, made a detailed inquiry for the monitoring vehicle's capacity configuration and usage, listened to the report of the city environmental protection Bureau on the city PM2.5 pollution prevention and                                                                                                                                                                                                                 | PA  | SPC member     | S35 |

|      |   |    |          |                                                                                                                                                                                                                                                                                                                                                                                                                                                                                                                                                                                                                                                                                                                                                                                             |     |            |     |
|------|---|----|----------|---------------------------------------------------------------------------------------------------------------------------------------------------------------------------------------------------------------------------------------------------------------------------------------------------------------------------------------------------------------------------------------------------------------------------------------------------------------------------------------------------------------------------------------------------------------------------------------------------------------------------------------------------------------------------------------------------------------------------------------------------------------------------------------------|-----|------------|-----|
|      |   |    |          | control planning and other work as well as the city PM2.5 monitoring release work progress.                                                                                                                                                                                                                                                                                                                                                                                                                                                                                                                                                                                                                                                                                                 |     |            |     |
| 2013 | 4 | 27 | S35, Y27 | Shanghai Environmental Monitoring Center Fengxian detachment carried out the special inspection for the main tributary of the upper reaches of the Huangpu River manganese-exceeded.                                                                                                                                                                                                                                                                                                                                                                                                                                                                                                                                                                                                        | MEA | SEMC       | S36 |
| 2013 | 5 | 7  | S35, Y27 | Shanghai Environmental Monitoring Center Fengxian detachment carried out special law enforcement inspection for industrial structure adjustment enterprise.                                                                                                                                                                                                                                                                                                                                                                                                                                                                                                                                                                                                                                 | MEA | SEMC       | S37 |
| 2013 | 5 | 8  | Y27      | Shanghai Municipal People 's Congress Standing Committee Deputy Director Xue Chao and his entourage, accompanied by the relevant leadership of Environmental Protection Bureau Director Zhang Quan, traffic port bureau and the traffic police corps, went to the oil depot and motor vehicle road inspection site to check oil and gas recovery and treatment plant operation and motor vehicle road inspection, and held a live meeting, listened to carry out motor vehicle pollution prevention and control work and traffic port pollution management and motor vehicle law enforcement and other related reports.                                                                                                                                                                     | PA  | SPC member | S38 |
| 2013 | 5 | 20 | S38, Y27 | Shanghai Environmental Monitoring Center Jiading District Environmental Monitoring Detachment conducted law enforcement inspection action for region-wide mercury-related enterprises.                                                                                                                                                                                                                                                                                                                                                                                                                                                                                                                                                                                                      | PA  | SEMC       | S39 |
| 2013 | 6 | 5  | Y27      | Shanghai Municipal People's Congress Standing Committee Director Yin Yicui, Deputy Director Xue Chao conducted research on the PM2.5 pollution monitoring and prevention work. Municipal People's Congress Standing Committee Yin Yicui, Deputy Director Xu Chao led a number of the representatives of the city people's Congress, and media reporters to the city Environmental Monitoring Center and Xuhui sun and moonlight center construction site, to check the air quality data collection and release, understand the construction site environmental pollution on-line monitoring pilot work carried out, and in the subsequent forum, listened to the city's environmental protection departments on the city PM2.5 monitoring and pollution prevention and control work report. | PA  | SPC member | S40 |

|      |    |    |          |                                                                                                                                                                                                                                                                                                                                                                                      |     |                                                                                      |     |
|------|----|----|----------|--------------------------------------------------------------------------------------------------------------------------------------------------------------------------------------------------------------------------------------------------------------------------------------------------------------------------------------------------------------------------------------|-----|--------------------------------------------------------------------------------------|-----|
| 2013 | 8  | 8  | Y27      | Shanghai Vice Mayor Jiang Zhuoqing, Deputy Secretary-General Huang Rong went to the Municipal Environmental Protection Bureau to conduct research and discussion on the city's environmental protection work.                                                                                                                                                                        | PA  | SH mayor                                                                             | S41 |
| 2013 | 8  | 14 | S41, Y27 | Shanghai Environmental Inspection Corps carried out environmental monitoring special inspection work.                                                                                                                                                                                                                                                                                | MEA | SEMC                                                                                 | S42 |
| 2013 | 8  | 15 | S41, Y27 | Shanghai Environmental Monitoring Center Yangpu Detachment carried out special inspection of electroplating enterprises.                                                                                                                                                                                                                                                             | MEA | SEMC                                                                                 | S43 |
| 2013 | 8  | 23 | S41, Y27 | Qingpu Detachment of Shanghai Environmental Monitoring Center carried out special inspection of heavy-metal pollution.                                                                                                                                                                                                                                                               | MEA | SEMC                                                                                 | S44 |
| 2013 | 9  | 2  | Y27      | Shanghai Environmental Protection Bureau, Ma Jianxun, Secretary of the Party Committee of Shanghai Municipal Environmental Protection Bureau, came to the corps to conduct an investigation and Discussion on the environmental supervision work of the city.                                                                                                                        | PA  | SHEPA director                                                                       | S45 |
| 2013 | 9  | 13 |          | Shanghai Mayor Yang Xiong went to Shanghai Environmental Protection Bureau for investigation, listened to the work on the progress of this key work and the next step of the research, analyzed the current environmental protection work situation and promote the difficulties, and put forward clear requirements for the city's environmental protection work of the next stage. | PA  | SH mayor                                                                             | S46 |
| 2013 | 9  | 18 |          | Jiang Zhuoqing, Vice Mayor of Shanghai, presided over the three-year plan of action on pollution reduction and the fifth round of environmental protection.                                                                                                                                                                                                                          | PA  | SHEPA director<br>SHDRC director<br>SHTB director<br>SHFB director<br>SHPSB director | S47 |
| 2013 | 11 | 7  |          | Shanghai Clean Air Action Plan (2013-2017).                                                                                                                                                                                                                                                                                                                                          | LPA | SHG                                                                                  | S48 |
| 2013 | 12 | 31 | S32, Y30 | Shanghai pollution source automatic monitoring facilities operating regulation and automatic monitoring data enforcement application requirements.                                                                                                                                                                                                                                   | LPA | SHEPA                                                                                | S49 |
| 2014 | 1  | 17 | S48      | Shanghai Environmental Protection Bureau, Wu Qizhou, Deputy Director of Shanghai Municipal Environmental Protection Bureau, went to Shanghai Environmental Monitoring Corps to investigate the work in 2013 and the work plan for 2014.                                                                                                                                              | PA  | SHEPA director                                                                       | S50 |
| 2014 | 2  | 14 |          | Management approach of Shanghai on promoting the adjustment of industrial structure and adjusting the price of electricity.                                                                                                                                                                                                                                                          | LPA | SHG<br>SHDRC<br>SHEITC                                                               | S51 |

|      |    |    |               |                                                                                                                                                                                                                                                                                                                                                                                                                                                                                                                                                                                                                                                                                                      |     |                    |     |
|------|----|----|---------------|------------------------------------------------------------------------------------------------------------------------------------------------------------------------------------------------------------------------------------------------------------------------------------------------------------------------------------------------------------------------------------------------------------------------------------------------------------------------------------------------------------------------------------------------------------------------------------------------------------------------------------------------------------------------------------------------------|-----|--------------------|-----|
|      |    |    |               |                                                                                                                                                                                                                                                                                                                                                                                                                                                                                                                                                                                                                                                                                                      |     | SHEPA<br>SHFB      |     |
| 2014 | 7  | 10 | Y30           | Shanghai Municipal Government organized the first half of 2014, Shanghai, the main pollutant emission reduction verification report.                                                                                                                                                                                                                                                                                                                                                                                                                                                                                                                                                                 | PA  | SHG                | S52 |
| 2014 | 7  | 25 | S48, Y32      | Regulations on Prevention and Control of Air Pollution in Shanghai.                                                                                                                                                                                                                                                                                                                                                                                                                                                                                                                                                                                                                                  | LPA | SPC                | S53 |
| 2014 | 7  | 30 | Y32           | Shanghai municipal Party committee secretary Han is investigating Shanghai Environmental Monitoring Center. It is pointed out that the masses are most concerned about the environment and expect good air quality.                                                                                                                                                                                                                                                                                                                                                                                                                                                                                  | PA  | SH Party Secretary | S54 |
| 2014 | 8  | 7  | Y29, Y31      | Shanghai Environmental Protection Bureau, Shanghai Environmental Protection Bureau Shanghai Environmental Protection Bureau Fang Fang, Deputy Director of Xuhui District, Changning District, Putuo District, Minhang District and Zhabei District, Hongkou District, Yangpu District, Baoshan District and other district of water pollution prevention and control work forum, the main environmental protection bureau leaders, in charge of leadership and responsible Long and the Municipal Environmental Protection Bureau Water Department, the total amount of (monitoring), the Environmental Science and Environmental Monitoring Center of the relevant person in charge of the meeting. | PA  | SHEPA              | S55 |
| 2014 | 8  | 26 | S54, S55, Y32 | Shanghai Environmental Monitoring Corps organized the city to carry out special inspection work with black smoke.                                                                                                                                                                                                                                                                                                                                                                                                                                                                                                                                                                                    | PA  | SEMC               | S56 |
| 2014 | 9  | 20 | S54, S55, Y32 | Shanghai Environmental Monitoring Corps to carry out the sewage charges inspection work of the iron and steel industry in 2013.                                                                                                                                                                                                                                                                                                                                                                                                                                                                                                                                                                      | MEA | SEMC               | S57 |
| 2014 | 10 | 9  | S54, S55, Y32 | Shanghai Environmental Protection Bureau, Shanghai Environmental Protection Bureau Joint Environmental Monitoring Center to carry out "Hundred Days Enforcement Inspection" work.                                                                                                                                                                                                                                                                                                                                                                                                                                                                                                                    | MEA | SHEPA              | S58 |
| 2014 | 10 | 14 | Y32           | Vice Mayor of Shanghai Jiang Zhaoxing researched Shanghai Environmental Monitoring Corps, focusing on the implementation of the city's environmental law enforcement work, and to strengthen the city's environmental law enforcement capacity building and other work were discussed.                                                                                                                                                                                                                                                                                                                                                                                                               | PA  | SH mayor           | S59 |
| 2014 | 10 | 29 | S59, Y32      | Shanghai Municipal Committee held a special workshop on air pollution prevention and control. At the meeting, the current party secretary Han Zhen stressed that for atmospheric environmental governance, to go bite.                                                                                                                                                                                                                                                                                                                                                                                                                                                                               | PA  | SH CPC Politburo   | S60 |

|      |    |    |          |                                                                                                                                                                                                                                                                                                                                                                              |     |                                                     |     |
|------|----|----|----------|------------------------------------------------------------------------------------------------------------------------------------------------------------------------------------------------------------------------------------------------------------------------------------------------------------------------------------------------------------------------------|-----|-----------------------------------------------------|-----|
| 2014 | 11 | 4  | S60, Y32 | Shanghai environmental monitoring system held a promotion workshop of medium-small coal-fired boilers and kilns law enforcement inspection work promotion meeting.                                                                                                                                                                                                           | PA  | SEMC                                                | S61 |
| 2014 | 11 | 15 | S11      | Measures for deadline correction of water pollution control in Shanghai.                                                                                                                                                                                                                                                                                                     | LPA | SHG                                                 | S62 |
| 2014 | 11 | 24 | Y32      | Vice Mayor of Shanghai Ai Baojun and Deputy Secretary-General Dai Haibo, in Shanghai Environmental Protection Bureau, conducted a survey on the basic ideas of the 13th five-year plan.                                                                                                                                                                                      | PA  | SH mayor                                            | S63 |
| 2014 | 12 | 10 | S63, Y36 | Shanghai Environmental Protection Bureau, Shanghai Environmental Protection Bureau Director Zhang Quanhua, Deputy Directors Wu Qizhou and Su Guodong led the responsible persons of the Office, Planning, Regulations, Regulations, Pollution Department, Water Department and other departments, to the City Environmental Monitoring Corps conducted annual work research. | PA  | SH mayor                                            | S64 |
| 2015 | 2  | 25 | S64      | Three-year (2015-2017) Action Plan for Environmental Protection and Construction in Shanghai.                                                                                                                                                                                                                                                                                | LPA | SHG                                                 | S65 |
| 2015 | 4  | 1  | S62, Y36 | Shanghai Environmental Protection Bureau led the team to carry out monthly investigation law enforcement activities.                                                                                                                                                                                                                                                         | MEA | SHEPA                                               | S66 |
| 2015 | 4  | 24 | S66      | Shanghai Municipal Government held a conference to strengthen the city's environmental regulatory law enforcement work.                                                                                                                                                                                                                                                      | PA  | SHEPA director<br>SHHURD director<br>SHPSB director | S67 |
| 2015 | 4  | 28 |          | Chen Jining, Minister of Environmental Protection, investigated the environmental protection work in Shanghai and held a symposium on environmental protection work in the Yangtze River Delta.                                                                                                                                                                              | PA  | MOEP<br>SHG                                         | S68 |
| 2015 | 5  | 12 | S67      | Shanghai Environmental Monitoring Center held a conference on monitoring quality of atmospheric automatic stations in Shanghai key industrial parks.                                                                                                                                                                                                                         | PA  | SEMC                                                | S69 |
| 2015 | 6  | 3  |          | Shanghai Environmental Inspection Corps organized a conference on the implementation of differential tariffs on environmental enterprises.                                                                                                                                                                                                                                   | PA  | SHEPA<br>SHEITC<br>SHESSC                           | S70 |
| 2015 | 7  | 1  | S65      | Opinions on Promoting the Implementation of Air Pollution Prevention and Control of Non-Road Mobile Machinery.                                                                                                                                                                                                                                                               | LPA | SHEPA<br>SHTB<br>SHEITC                             | S71 |

|      |    |    |          |                                                                                                                                                                                                                                                                                                                                                                                                                                                                                                                                                                        |     |                                        |     |
|------|----|----|----------|------------------------------------------------------------------------------------------------------------------------------------------------------------------------------------------------------------------------------------------------------------------------------------------------------------------------------------------------------------------------------------------------------------------------------------------------------------------------------------------------------------------------------------------------------------------------|-----|----------------------------------------|-----|
|      |    |    |          |                                                                                                                                                                                                                                                                                                                                                                                                                                                                                                                                                                        |     | SHAB<br>SHQSB                          |     |
| 2015 | 7  | 27 |          | The Jinshan Detachment of Shanghai Environmental Monitoring Center carried out the special law enforcement work of the two industrial zones.                                                                                                                                                                                                                                                                                                                                                                                                                           | MEA | SEMC                                   | S72 |
| 2015 | 7  | 30 | S65      | Implementation Plans of Accelerating the Work of the City's Cogeneration Coal-fired Boiler Replaced by Clean Energy.                                                                                                                                                                                                                                                                                                                                                                                                                                                   | LPA | SHG<br>SHDR<br>SHEITC<br>SHEPA<br>SHFB | S73 |
| 2015 | 9  | 23 |          | Shanghai Environmental Protection Bureau, Zhang Quan, Director of Shanghai Environmental Protection Bureau, carried out work research in Shanghai Environmental Monitoring Corps. At the research meeting, Director Zhang listened carefully to the speaking of the Corps leaders and middle-level cadres, and the comrades made a report to Director Zhang in the areas of Jinshan area comprehensive environmental law enforcement, key corporate supervision, hot spot petition handling and environmental law enforcement measures, actively make recommendations. | PA  | SHEPA director                         | S74 |
| 2015 | 11 | 14 | S74      | In order to handle the possible high-pollution weather, Shanghai Environmental Protection Bureau formulated the temporary emission reduction and control scheme to guarantee the air quality for this winter with the related departments.                                                                                                                                                                                                                                                                                                                             | MEA | SHEPA                                  | S75 |
| 2015 | 11 | 30 | S75      | Shanghai City started the emergency inspection of environmental protection in the heavy pollution weather for the first time.                                                                                                                                                                                                                                                                                                                                                                                                                                          | MEA | SEMC                                   | S76 |
| 2015 | 12 | 2  |          | Implementation Scheme of the Action Plan for Water Pollution Control in Shanghai.                                                                                                                                                                                                                                                                                                                                                                                                                                                                                      | LPA | SHEPA                                  | S77 |
| 2016 | 1  | 8  | S74      | Shanghai Environmental Protection Bureau convened the thematic conference of environment supervision and random inspection.                                                                                                                                                                                                                                                                                                                                                                                                                                            | PA  | SHEPA director<br>SEMC director        | S78 |
| 2016 | 3  | 1  | S78, Y42 | Shanghai Environmental Monitoring Center Minhang District Environment Monitoring Detachment carried out the special examination of law enforcement on the VOCs key industry.                                                                                                                                                                                                                                                                                                                                                                                           | MEA | SEMC                                   | S79 |
| 2016 | 6  | 5  | S76, Y44 | Shanghai started the forecast service of air quality under the new standard system to establish the air quality real-time publication of Shanghai City for                                                                                                                                                                                                                                                                                                                                                                                                             | MEA | SHEPA<br>SHMA                          | S80 |

|                                              |    |    |          |                                                                                                                                                                                                                                                      |     |                                          |     |
|----------------------------------------------|----|----|----------|------------------------------------------------------------------------------------------------------------------------------------------------------------------------------------------------------------------------------------------------------|-----|------------------------------------------|-----|
|                                              |    |    |          | providing reference to the public with their trip and health protection through the daily announcement of the forecast results of day parting air quality in the future 24 hours as well as support the early warning of the heavy pollution of air. |     |                                          |     |
| 2016                                         | 7  | 1  | S78      | Shanghai Environmental Monitoring Center Hongkou Detachment carried out a special examination of printing VOCs.                                                                                                                                      | MEA | SEMC                                     | S81 |
| 2016                                         | 7  | 9  |          | Regulations on Environmental Protection in Shanghai (Revised).                                                                                                                                                                                       | LPA | SPC                                      | S82 |
| 2016                                         | 7  | 13 | S78      | Shanghai Environmental Monitoring Center Jiading Detachment carried out the surprise inspection of the oil burning boiler in the district in conjunction with the Monitoring Station.                                                                | MEA | SEMC                                     | S83 |
| 2016                                         | 7  | 19 | S77      | ChenYin and Sun Jiwei, Vice Mayor and Deputy Secretary-General of Shanghai City, convened special session to discuss the advancement and implementation of the work related to the action plan of water pollution control.                           | PA  | SHG<br>SHEPA                             | S84 |
| 2016                                         | 8  | 1  | S78, Y34 | Shanghai Environmental Monitoring Center Xuhui Detachment carried out a special examination of the automobile maintenance industry.                                                                                                                  | MEA | SEMC                                     | S85 |
| 2016                                         | 8  | 11 | S84      | Shanghai Environmental Monitoring Center Xuhui Detachment carried out a joint law enforcement with the sewage treatment plant.                                                                                                                       | MEA | SEMC                                     | S86 |
| 2016                                         | 10 | 14 | S82      | Implementation Meeting of Regulations of Shanghai Municipality of Environmental Protection was jointly held by Shanghai Municipal People's Congress and Municipal Government.                                                                        | PA  | SHEPA director<br>SPC member<br>SH mayor | S87 |
| 2016                                         | 11 | 16 | S86      | Shanghai Municipal Reform Group Meeting examined and adopted Execute Solution of Shanghai City on Full Implementation of River Chief System to treat water pollution of the city.                                                                    | PA  | SH mayor<br>SHEPA director               | S88 |
| <b>Part C: Autonomous Actions in Jiangsu</b> |    |    |          |                                                                                                                                                                                                                                                      |     |                                          |     |
| 1997                                         | 7  | 31 |          | Regulations on Environmental Protection of Jiangsu Province (revised in 1997).                                                                                                                                                                       | LPA | JPC                                      | J1  |
| 2004                                         | 6  | 17 | J1, Y5   | Regulations on Prevention of Automobile Gas Emission Pollution of Jiangsu Province.                                                                                                                                                                  | LPA | JPC                                      | J2  |
| 2004                                         | 6  | 18 | J1, Y5   | Regulations on Prevention of Pollution of Vessels in Inland Waters of Jiangsu Province.                                                                                                                                                              | LPA | JPC                                      | J3  |
| 2006                                         | 12 | 26 | J1       | Provisions on Open Government in Environmental Protection of Jiangsu Province.                                                                                                                                                                       | LPA | JSEPA                                    | J4  |

|      |    |    |             |                                                                                                                                       |     |                                                                                              |     |
|------|----|----|-------------|---------------------------------------------------------------------------------------------------------------------------------------|-----|----------------------------------------------------------------------------------------------|-----|
| 2008 | 1  | 9  | Y10         | Provisions on Chargeable Use of Emission Index of Major Water Pollutants in the Taihu Lake Basin of Jiangsu Province (Trial).         | LPA | JSEPA<br>JSDRC<br>JSFB<br>JSETC                                                              | J5  |
| 2008 | 1  | 16 | Y10         | Provisions on Chargeable Use of Emission Index of Sulfur Dioxide of Jiangsu Province (Trial).                                         | LPA | JSEPA<br>JSDRC<br>JSFB<br>JSETC                                                              | J6  |
| 2008 | 4  | 20 | J4          | Evaluation System for Governmental Information Disclosure of the Environmental Protection Bureau of Jiangsu Province (Trial).         | LPA | JSEPA                                                                                        | J7  |
| 2008 | 6  | 5  | J1, Y10     | Regulations on Prevention of Water Pollution of Taihu Lake of Jiangsu Province.                                                       | LPA | JSEPA                                                                                        | J8  |
| 2009 | 9  | 23 | J1, Y16     | Regulations on Prevention of Environmental Protection from Solid Wastes of Jiangsu Province.                                          | LPA | JPC                                                                                          | J9  |
| 2010 | 8  | 2  | J1, J2, Y17 | “Blue Sky Project” to improve air environment in Jiangsu.                                                                             | MEA | JSG                                                                                          | J10 |
| 2010 | 10 | 26 | J10         | Establish office for joint prevention and control of air pollution of Jiangsu Province.                                               | LPA | JSG<br>JSEPA<br>ISDRC<br>JSEITB<br>JSSTB<br>JSPSB<br>JSFB<br>JSLRB<br>JSHURD<br>JSTB<br>JSAB | J11 |
| 2011 | 3  | 2  | J7          | Notification on Further Strengthening Provincial Environmental Monitoring by the Environmental Protection Bureau of Jiangsu Province. | LPA | JSEPA                                                                                        | J12 |
| 2011 | 5  | 18 | Y17         | Basin Office of the Environmental Protection Department of Jiangsu Province conducted special inspection along Zhetangxinhe River.    | MEA | JSEPA                                                                                        | J13 |

|      |    |    |          |                                                                                                                                                                                                                                                                  |     |                  |     |
|------|----|----|----------|------------------------------------------------------------------------------------------------------------------------------------------------------------------------------------------------------------------------------------------------------------------|-----|------------------|-----|
| 2011 | 5  | 25 | Y17      | The Environmental Protection Department of Jiangsu Province and Taihu Lake Office have conducted environmental protection law enforcement inspection on some key enterprises discharging pollutants in southern part of Jiangsu.                                 | MEA | JSEPA            | J14 |
| 2011 | 6  | 3  | J12      | Provisions on Automatic Monitoring and Management of Pollution Source of Jiangsu Province.                                                                                                                                                                       | LPA | JSEPA            | J15 |
| 2011 | 6  | 10 | J8       | Basin Office of the Environmental Protection Department of Jiangsu Province conducted investigation of the abnormality of water in the Taihu Lake basin.                                                                                                         | MEA | JSEPA            | J16 |
| 2012 | 1  | 12 | J1       | Regulations on the Prevention of Water Pollution of Tongyu River of Jiangsu Province. Regulations on the Prevention of Water Pollution of Taihu Lake of Jiangsu Province. Regulations on the Prevention of Water Pollution of Yangtze River of Jiangsu Province. | LPA | JPC              | J17 |
| 2012 | 3  | 20 | J12      | Notification on Deeply Promoting Credit Evaluation of the Environmental Behavior of the Enterprises and Information Disclosure by the Environmental Protection Bureau of Jiangsu Province.                                                                       | LPA | JSEPA            | J18 |
| 2012 | 3  | 21 | J12      | Notification on Provincial Environment and Air Monitoring Information Disclosure by the Environmental Protection Bureau of Jiangsu Province.                                                                                                                     | LPA | JSEPA            | J19 |
| 2012 | 4  | 16 | J15      | The Environmental Protection Department of Jiangsu Province pushes forward standard construction of provincial environment monitoring station.                                                                                                                   | MEA | JSEPA            | J20 |
| 2012 | 6  | 28 | J20      | Notification on the Acceptance Check of the Standard Construction of Environment Monitoring Station by the Environmental Protection Bureau of Jiangsu Province.                                                                                                  | LPA | JSEPA            | J21 |
| 2013 | 1  | 5  | J18      | Provisions on Environmental Protection Credit Evaluation and Management of the Enterprises of Jiangsu Province.                                                                                                                                                  | LPA | JSEPA<br>JSSCSLG | J22 |
| 2013 | 1  | 19 | J8, J17  | Basin Office of the Environmental Protection Department of Jiangsu Province established local chiefs' responsibility system along Huaihe River.                                                                                                                  | MEA | JSEPA            | J23 |
| 2013 | 8  | 5  | J19      | Suggestions on the Implementation of Strengthening Monitoring Information Disclosure of Pollution Source.                                                                                                                                                        | LPA | JSEPA            | J24 |
| 2013 | 11 | 29 | J2       | Regulations on the Prevention of Automobiles Exhaust Pollution in Jiangsu Province.                                                                                                                                                                              | LPA | JPC              | J25 |
| 2014 | 1  | 6  | J10, J11 | Implementation Plan for Prevention Actions of Air Pollution of Jiangsu Province.                                                                                                                                                                                 | LPA | JSG              | J26 |

|      |    |    |               |                                                                                                                                                                                                                                                                                |     |                |     |
|------|----|----|---------------|--------------------------------------------------------------------------------------------------------------------------------------------------------------------------------------------------------------------------------------------------------------------------------|-----|----------------|-----|
| 2014 | 3  | 13 | J23           | Basin Office of the Environmental Protection Department of Jiangsu Province conducted 2014 monitoring and early warning of water pollution and cyanobacteria of the Taihu Lake.                                                                                                | MEA | JSEPA          | J27 |
| 2014 | 5  | 16 | J26, Y30      | Implementation Plan for the Actions of Energy Saving and Emission Reduction and Low Carbon Development of Jiangsu Province for 2014-2015.                                                                                                                                      | LPA | JSG            | J28 |
| 2014 | 6  | 16 | J28, Y30      | Work Plan for Prevention of Air Pollution of Jiangsu Province in 2014.                                                                                                                                                                                                         | LPA | JSEPA          | J29 |
| 2014 | 9  | 3  | J29, Y32      | "Law enforcement and special inspection to guarantee the air quality during Youth Olympic Games".                                                                                                                                                                              | MEA | JSEPA          | J30 |
| 2014 | 10 | 8  | J28, J29, J30 | Notification on Taking Practical and Effective Measures to Improve Air Quality.                                                                                                                                                                                                | LPA | JSG            | J31 |
| 2014 | 12 | 1  | J29, Y32      | The Environmental Protection Department of Jiangsu Province conducted special inspection of air pollution in October to December of 2014.                                                                                                                                      | MEA | JSEPA          | J32 |
| 2015 | 1  | 30 | Y36           | Work Plan for General Inspection of Environmental Protection of Jiangsu Province.                                                                                                                                                                                              | LPA | JSG            | J33 |
| 2015 | 2  | 1  | J26           | Regulations on Air Pollution Prevention of Jiangsu Province.                                                                                                                                                                                                                   | LPA | JPC            | J34 |
| 2015 | 3  | 27 | J16           | Basin Office of the Environmental Protection Department of Jiangsu Province conducted 2015 monitoring and early warning of water pollution and cyanobacteria of the Taihu Lake.                                                                                                | MEA | JSEPA          | J35 |
| 2015 | 6  | 5  | J15, J33      | Deputy Director, Jiang Wei, of the Environmental Protection Department of Jiangsu Province surveyed water pollution prevention work of the major rivers that flow into Taihu Lake.                                                                                             | PA  | JSEPA director | J36 |
| 2015 | 7  | 16 | J33, Y38      | The 7th Air Pollution Prevention Joint Meeting of Jiangsu Province, which is the air pollution prevention site meeting, was held in Nanjing.                                                                                                                                   | PA  | JSEPA          | J37 |
| 2015 | 7  | 16 | J33, Y38      | Central Jiangsu Environment Protection Supervision Center of the Environmental Protection Department of Jiangsu Province conducted tracking and supervision of the comprehensive environment remediation in the industrial concentration area of northwestern part of Taizhou. | MEA | JSEPA          | J38 |
| 2015 | 7  | 31 | J33, Y38      | The People's Government of Jiangsu Province called for a meeting of promoting provincial environmental protection general inspection.                                                                                                                                          | PA  | JSG            | J39 |
| 2015 | 8  | 10 | J39, Y38      | Southern Jiangsu Environment Protection Supervision Center of the Environmental Protection Department of Jiangsu Province conducted special inspection of environmental protection supervision.                                                                                | MEA | JSEPA          | J40 |

|      |    |    |                    |                                                                                                                                                                                                                                                                                             |     |                |     |
|------|----|----|--------------------|---------------------------------------------------------------------------------------------------------------------------------------------------------------------------------------------------------------------------------------------------------------------------------------------|-----|----------------|-----|
| 2015 | 8  | 25 | J33, Y38           | Central Jiangsu Environment Protection Supervision Center of the Environmental Protection Department of Jiangsu Province together with Inspection Office, called for a symposium for the environmental protection work of some key enterprises of Yangzhou.                                 | PA  | JSEPA          | J41 |
| 2015 | 9  | 7  | J33, Y38           | Chen Mengmeng, Director of the environmental Protection Department of Jiangsu Province, went to Wuxi and Jiangyin to investigate and instruct the work of environmental protection.                                                                                                         | PA  | JSEPA director | J42 |
| 2015 | 9  | 14 | J33, Y38, Y39      | Chen Mengmeng, Director of the environmental Protection Department of Jiangsu Province, went to Xuzhou to investigatethe work of environmental protection.                                                                                                                                  | PA  | JSEPA director | J43 |
| 2015 | 9  | 15 | J33, Y38, Y39      | Central JiangsuEnvironment Protection Supervision Center of the Environmental Protection Department of Jiangsu Province conducted special inspection of the work of environmental protection.                                                                                               | MEA | JSEPA          | J44 |
| 2015 | 10 | 12 | J33, Y38, Y39      | Northern Jiangsu Environment Protection Supervision Center of the Environmental Protection Department of Jiangsu Province conducted special inspection of environmental protection supervision of the environmental protection departments of city and county levels in Xuzhou and Huai'an. | MEA | JSEPA          | J45 |
| 2015 | 11 | 23 | J33, Y39, Y40, Y41 | Northern Jiangsu Environment Protection Supervision Center of the Environmental Protection Department of Jiangsu Province conducted special supervision of the work of environmental protection in Lianyungang, Huai'an, Yancheng and Suqian.                                               | MEA | JSEPA          | J46 |
| 2015 | 12 | 8  | Y42                | Jiang Wei, Deputy Director of the Environmental Protection Department of Jiangsu Province led comrades from provincial Bureau of Nuclear Safety Administration to investigate and instruct the work of the Environmental Protection Department of Nanjing.                                  | PA  | JSEPA director | J47 |
| 2015 | 12 | 10 | Y42                | Southern Jiangsu Environment Protection Supervision Center of the Environmental Protection Department of Jiangsu Province organized and called for a site meeting on the remediation work of the industrial park in the southern part of Jiangsu province.                                  | PA  | JSEPA          | J48 |
| 2015 | 12 | 18 | Y42                | Deputy Director of the Environmental Protection Department of Jiangsu Province, Jiang Wei, led relevant personnel of the Division of Policy and Regulation and Bureau of Nuclear Safety Administration to go to the                                                                         | PA  | JSEPA director | J49 |

|      |    |    |     |                                                                                                                                                                                                                                                                                                                                                  |     |                |     |
|------|----|----|-----|--------------------------------------------------------------------------------------------------------------------------------------------------------------------------------------------------------------------------------------------------------------------------------------------------------------------------------------------------|-----|----------------|-----|
|      |    |    |     | Environmental Protection Department of Xuzhou to investigate and guide the work.                                                                                                                                                                                                                                                                 |     |                |     |
| 2015 | 12 | 22 |     | Work Plan for Prevention of Water Pollution of Jiangsu Province.                                                                                                                                                                                                                                                                                 | LPA | JSG            | J50 |
| 2015 | 12 | 25 | Y42 | Central Jiangsu Environment Protection Supervision Center of the Environmental Protection Department of Jiangsu Province actively promotes environment supervision and law enforcement in the industrial park and organized a symposium on the environment supervision and law enforcement in the industrial park of Central Jiangsu in Taizhou. | PA  | JSEPA          | J51 |
| 2016 | 3  | 4  | J34 | Work Plan for Prevention of Air Pollution of Jiangsu Province in 2016.                                                                                                                                                                                                                                                                           | LPA | JSEPA          | J52 |
| 2016 | 3  | 8  | J51 | Deputy Director, Yu Hongxia, of the Environmental Protection Department of Jiangsu Province, supervised and investigated the prevention of industrial sludge and pollution and the concerted treatment of hazardous articles and wastes.                                                                                                         | PA  | JSEPA director | J53 |
| 2016 | 5  | 8  | J50 | Southern Jiangsu Environment Protection Supervision Center of the Environmental Protection Department of Jiangsu Province promoted the remediation to guarantee the water quality of section reaching standard conducted by the nation.                                                                                                          | MEA | JSEPA          | J54 |
| 2016 | 5  | 10 | Y44 | Deputy inspector, Qian Gang, of the Reform Office of the Provincial Committee of Jiangsu led a group of people to the provincial environmental protection department for special symposium and supervised the implementation of the Action Plan for the Prevention of Air Pollution.                                                             | PA  | JS CPC member  | J55 |
| 2016 | 5  | 17 | Y44 | Director Chen Mengmeng came to the provincial ecological environment monitoring center to investigate and guide work and the following 3 points were made.                                                                                                                                                                                       | PA  | JSEPA director | J56 |
| 2016 | 6  | 6  | J54 | Director Chen Mengmeng of the Environmental Protection Department of Jiangsu Province supervised the comprehensive remediation of the environment of major rivers flowing into the Taihu Lake.                                                                                                                                                   | PA  | JSEPA director | J57 |
| 2016 | 6  | 15 | J33 | Environment Supervision Bureau of the Environmental Protection Department of Jiangsu Province conducted general inspection of environment protection work and disclosed the inspection information.                                                                                                                                              | MEA | JSEPA          | J58 |

|      |    |    |               |                                                                                                                                                                                                                                                                                                                    |     |             |     |
|------|----|----|---------------|--------------------------------------------------------------------------------------------------------------------------------------------------------------------------------------------------------------------------------------------------------------------------------------------------------------------|-----|-------------|-----|
| 2016 | 6  | 22 | J54           | The Environmental Protection Department of Jiangsu Province talked for 2 consecutive years with 20 local chiefs who are responsible for the section of county-level which had failed in reaching annual water quality target.                                                                                      | PA  | JSEPA       | J59 |
| 2016 | 7  | 1  | J59           | Southern Jiangsu Environment Protection Supervision Center of the Environmental Protection Department of Jiangsu Province promoted special inspection of the sections conducted by the nation.                                                                                                                     | MEA | JSEPA       | J60 |
| 2016 | 7  | 4  |               | Zhang Jinghua, Vice Governor of Jiangsu Province, investigated the work of the provincial Environmental Protection Department and several points were made here.                                                                                                                                                   | PA  | JS governor | J61 |
| 2016 | 7  | 7  | J61           | Southern Jiangsu Environment Protection Supervision Center of the Environmental Protection Department of Jiangsu Province promoted the remediation of the environment of Hudong Chemical Park.                                                                                                                     | MEA | JSEPA       | J62 |
| 2016 | 7  | 14 | J61           | Northern Jiangsu Environment Protection Supervision Center of the Environmental Protection Department of Jiangsu Province strengthened environmental protection supervision during flood season.                                                                                                                   | MEA | JSEPA       | J63 |
| 2016 | 8  | 15 | J57           | Standing Committee of the National People's Congress of Jiangsu Province conducted law enforcement and inspection according to the water pollution prevention regulations of Taihu Lake.                                                                                                                           | MEA | JPC         | J64 |
| 2016 | 9  | 20 | J61           | Southern Jiangsu Environment Protection Supervision Center of the Environmental Protection Department of Jiangsu Province organized and conducted supervision and inspection of the environment.                                                                                                                   | MEA | JSEPA       | J65 |
| 2016 | 10 | 24 |               | The People's Government of Jiangsu Province called for a meeting to promote the prevention of air and water pollution. Since the beginning of this year, Jiangsu Province has begun to further promote the prevention of air and water pollution.                                                                  | PA  | JSG         | J66 |
| 2016 | 11 | 18 | J66           | Environment Supervision Bureau of the Environmental Protection Department of Jiangsu Province conducted general inspection of environment protection work and disclosed the inspection information in key industries like steel, cement manufacturing, manufacturing of plate glass and treatment of urban sewage. | MEA | JSEPA       | J67 |
| 2016 | 11 | 25 | J66, Y46, Y48 | Northern Jiangsu Environment Protection Supervision Center of the Environmental Protection Department of Jiangsu Province conducted special law enforcement inspection in the prevention of air pollution in the winter.                                                                                           | MEA | JSEPA       | J68 |

| Part D: Autonomous Actions in Zhejiang |    |    |          |                                                                                                                                                                                                                                                                     |     |                     |     |
|----------------------------------------|----|----|----------|---------------------------------------------------------------------------------------------------------------------------------------------------------------------------------------------------------------------------------------------------------------------|-----|---------------------|-----|
| 2003                                   | 3  | 21 | Y2 Y3 Y4 | Zhejiang Provincial Party Secretary Xi Jinping led a delegation of Zhejiang Province to start a two-day study tour to Shanghai, and signed an agreement respectively with Shanghai and Jiangsu to further promote economic cooperation and technological exchanges. | PA  | ZJ Paraty Secretary | Z1  |
| 2003                                   | 5  | 1  | Z1       | Opinions on Taking the Initiative to Connect with Shanghai to Actively Participate in the Cooperation and Exchanges of Yangtze River Delta Region.                                                                                                                  | LPA | ZJG                 | Z2  |
| 2004                                   | 10 | 20 | Y5       | Regulations on Prevention and Control of Air Pollution of Zhejiang Province.                                                                                                                                                                                        | LPA | ZPC                 | Z3  |
| 2006                                   | 5  | 26 | Y5       | Regulations on Prevention and Control of Solid Wastes Pollution of Zhejiang Province.                                                                                                                                                                               | LPA | ZPC                 | Z4  |
| 2008                                   | 9  | 1  | Y8       | Regulations on Prevention and Control of Water Pollution in Zhejiang Province.                                                                                                                                                                                      | LPA | ZPC                 | Z5  |
| 2008                                   | 9  | 4  | Z5       | Measures for Water Quality Monitoring and Protection of River Joint Section in Cross-jurisdictional Areas of Zhejiang Province.                                                                                                                                     | LPA | ZJEPA               | Z6  |
| 2009                                   | 9  | 28 | Z5       | Regulations on Protection and Management of Wenruitang River of Zhejiang Province.                                                                                                                                                                                  | LPA | ZPC                 | Z7  |
| 2010                                   | 6  | 8  | Z3, Y17  | Action Plan for Clean Air in Zhejiang Province.<br>Efforts should be made to solve the acid rain, haze, photochemical smog and other prominent atmospheric pollution problems to comprehensively improve the air quality.                                           | LPA | ZJG<br>ZJEPA        | Z8  |
| 2010                                   | 11 | 25 | Z5       | Regulations on Water Environment Protection of Cao'e River of Zhejiang Province.                                                                                                                                                                                    | LPA | ZPC                 | Z9  |
| 2011                                   | 8  | 16 | Z5, Y17  | Action Plan for Clean Water in Zhejiang Province.                                                                                                                                                                                                                   | LPA | ZJG                 | Z10 |
| 2011                                   | 10 | 16 | Z8       | Zhejiang Environmental Protection Bureau has selected part of the clean air pilot projects.                                                                                                                                                                         | MEA | ZJEPA               | Z11 |
| 2011                                   | 12 | 20 | Y23      | Zhejiang Environmental Protection Bureau, in joint hands with city and county environmental protection departments, carried out the special law enforcement inspection under winter environmental protection plan.                                                  | MEA | ZJEPA               | Z12 |
| 2012                                   | 4  | 17 |          | 2012 Special Environmental Protection Action Plan of Zhejiang Province to Rectify Illegal Sewage Discharging Enterprises and Protect the Public Health.                                                                                                             | LPA | ZJEPA               | Z13 |
| 2012                                   | 4  | 25 | Z13      | Director of Zhejiang Environmental Protection Bureau, Xu Zhen, led the responsible comrades of the Office, Department of Planning and Finance, and Department of Ecology, respectively to Jinhua Tonglu and Huzhou to carry out                                     | PA  | ZJEPA director      | Z14 |

|      |    |    |                              |                                                                                                                                                                                                                                                                                                                                                                                                                                  |     |                |     |
|------|----|----|------------------------------|----------------------------------------------------------------------------------------------------------------------------------------------------------------------------------------------------------------------------------------------------------------------------------------------------------------------------------------------------------------------------------------------------------------------------------|-----|----------------|-----|
|      |    |    |                              | research on contiguous remediation of rural environment. Deputy director Fang Min was in the company to Jinhua.                                                                                                                                                                                                                                                                                                                  |     |                |     |
| 2012 | 6  | 8  |                              | Zhejiang Province sets up a leading group for environmental safety 100-day inspection activities.                                                                                                                                                                                                                                                                                                                                | LPA | ZJEPA          | Z15 |
| 2012 | 7  | 6  | Y25                          | Director of Zhejiang Environmental Protection Bureau, Xu Zhen, went to Hangzhou Environmental Protection Bureau for research work.                                                                                                                                                                                                                                                                                               | PA  | ZJEPA director | Z16 |
| 2012 | 7  | 10 | Y25                          | Director Xu Zhen led a team in Rui'an to carry out research on ecological environmental protection work. Xu Zhen and his entourage visited Huafeng Group, Rui'an Electroplating Base, Huayan National Forest Park, Chen'ao Village of Tangxia Town and other places, and listened to the reports on the work of ecological environmental protection of Rui'an City and Wenzhou City, respectively.                               | PA  | ZJEPA director | Z17 |
| 2012 | 7  | 18 | Y25                          | Director of Zhejiang Environmental Protection Bureau, Xu Zhen, led deputy inspector, and captain of inspection corps, Wang Yimiao and main persons in charge of the Office, Department of Regulations, Department of Ecology, and Department of Pollution Prevention and Control in Jiaxing City to carry out special investigation on water environment management and remediation of livestock and poultry breeding pollution. | PA  | ZJEPA director | Z18 |
| 2012 | 7  | 27 | Z15                          | Program for Zhejiang Province Environmental Safety 100-day Inspection Activities.                                                                                                                                                                                                                                                                                                                                                | LPA | ZJEPA          | Z19 |
| 2012 | 9  | 5  | Y25                          | Director of Zhejiang Environmental Protection Bureau, Xu Zhen, led persons in charge of the Office, Department of Regulations, Department of Pollution Prevention and Control, Department of Construction, Inspection Corps, and Information Center in Quzhou to carry out inspection and guidance of ecological and environmental protection work.                                                                              | PA  | ZJEPA director | Z20 |
| 2012 | 9  | 13 | Y25                          | Director of Zhejiang Environmental Protection Bureau, Xu Zhen, led the persons in charge of the Office, Department of Ecology, and Department of Pollution Prevention and Control to Cixi City to carry out a special inspection and investigation on the construction of provincial ecological city.                                                                                                                            | PA  | ZJEPA director | Z21 |
| 2012 | 10 | 31 | Z10, Z16, Z17, Z18, Z20, Z21 | Work Promotion Meeting on Zhejiang Province Clean Water Action and Qiantang River Basin Water Pollution Prevention and Control will be held in Fuyang. Deputy Director Zhang Chen reported the situation of transition section assessment of the entire province in the first three quarters.                                                                                                                                    | PA  | ZJ governor    | Z22 |

|      |    |    |                             |                                                                                                                                                                                                                                                                                                                                                                                                            |    |                |     |
|------|----|----|-----------------------------|------------------------------------------------------------------------------------------------------------------------------------------------------------------------------------------------------------------------------------------------------------------------------------------------------------------------------------------------------------------------------------------------------------|----|----------------|-----|
| 2012 | 11 | 1  | Z8, Z16, Z17, Z18, Z20, Z21 | Enlarged meeting of Zhejiang Province Clean Air Action Leading Group and joint meeting of motor vehicle exhaust pollution prevention and control was held in Fuyang.                                                                                                                                                                                                                                       | PA | ZJ governor    | Z23 |
| 2013 | 3  | 3  | Y26                         | Deputy Director of Zhejiang Environmental Protection Bureau Lu Chunzhong led a group to Haiyan County to conduct an in-depth research.                                                                                                                                                                                                                                                                     | PA | ZJEPA director | Z24 |
| 2013 | 3  | 4  | Y26                         | Director of Zhejiang Environmental Protection Bureau Xu Zhen led the persons in charge of the Office, Department of Regulations, and Department of Total Amount to Fenghua City to carry out research.                                                                                                                                                                                                     | PA | ZJEPA director | Z25 |
| 2013 | 3  | 4  | Y26                         | Deputy director of Zhejiang Environmental Protection Bureau Yu Xuanling led the persons in charge of the Office, Department of Planning and Finance, and Department of Total Amount to Jiande City to carry out 100-group research activities.                                                                                                                                                             | PA | ZJEPA director | Z26 |
| 2013 | 3  | 7  |                             | Deputy Director of Zhejiang Environmental Protection Bureau Zhang Peiguo led the provincial head of Solid Waste Management Center to Hangzhou and Huzhou to carry out special research activities under solid waste supervision.                                                                                                                                                                           | PA | ZJEPA director | Z27 |
| 2013 | 3  | 28 | Z19, Z24, Z25, Z26, Z27     | Zhejiang Environmental Monitoring Work Symposium was held in Hangzhou. After listening to the speeches, Deputy Director Zhang Peiguo gave an important speech, fully affirming the achievements of environmental monitoring work of the entire province in 2012.                                                                                                                                           | PA | ZJEPA director | Z28 |
| 2013 | 7  | 26 |                             | Director of Zhejiang Environmental Protection Bureau Xu Zhen went to Jiaxing to investigate the water control work.                                                                                                                                                                                                                                                                                        | PA | ZJEPA director | Z29 |
| 2013 | 8  | 9  | Y27                         | Director of Zhejiang Environmental Protection Bureau, Xu Zhen, led the persons in charge of the Office, Department of Pollution Prevention and Control, Department of Science and Environmental Protection Industry Association to Zhuji City to study the remediation of heavy-polluting industries and the development of environmental protection industry.                                             | PA | ZJEPA director | Z30 |
| 2013 | 11 | 6  | Y28                         | Director of Zhejiang Environmental Protection Bureau, Xu Zhen, led the party group members, deputy inspectors, Inspection Corps Captain Wang Yimiao, and persons in charge of Department of Pollution Prevention and Control, Department of Total Amount, and Department of Construction to Dongyang City, Wuyi County, Yongkang City, Jinhua City to carry out research on environmental protection work. | PA | ZJEPA director | Z31 |

|      |    |    |                  |                                                                                                                                                                                                                                                                                                |     |                        |     |
|------|----|----|------------------|------------------------------------------------------------------------------------------------------------------------------------------------------------------------------------------------------------------------------------------------------------------------------------------------|-----|------------------------|-----|
| 2013 | 11 | 18 |                  | Notice of Zhejiang Environmental Protection Bureau on Strengthening Environmental Information Disclosure.                                                                                                                                                                                      | LPA | ZJEPA                  | Z32 |
| 2013 | 11 | 20 | Y28              | Director of Zhejiang Environmental Protection Bureau, Xu Zhen, led his entourage to Lucheng District, Rui'an City, Yueqing City, Pingyang County, and Cangnan County to carry out research on environmental protection work.                                                                   | PA  | ZJEPA director         | Z33 |
| 2014 | 1  | 31 | Y30              | Zhejiang Province Air Pollution Control Action Plan (2013-2017).                                                                                                                                                                                                                               | LPA | ZJEPA<br>ZJG           | Z34 |
| 2014 | 5  | 6  | Z34              | Notice on Doing a Good Job in Urban Air Pollution Monitoring and Early Warning by Zhejiang Environmental Protection Bureau. Attachment: Code for Zhejiang Province Ambient Air Quality Forecast and Early Warning Work (Trial).                                                                | LPA | ZJEPA                  | Z35 |
| 2014 | 5  | 6  | Z34              | Special Implementation Plan under Zhejiang Province Air Pollution Control Action Plan.                                                                                                                                                                                                         | LPA | ZJEPA<br>ZJG           | Z36 |
| 2014 | 7  | 16 | Z36              | Division Plan of Key Work Departments for Zhejiang Province Air Pollution Control Action Plan.                                                                                                                                                                                                 | LPA | ZJEPA                  | Z37 |
| 2014 | 7  | 23 | Y32              | Director Xu Zhen and Deputy Director Zhang Chen of Zhejiang Environmental Protection Bureau led the persons in charge of the Office, Department of Personnel, and Department of Regulation Information to Zhejiang Environmental Monitoring Center to carry out research and provide guidance. | PA  | ZJEPA director         | Z38 |
| 2014 | 8  | 15 | Y31              | Opinions on Further Strengthening Environmental Supervision and Management of the Qiantang River Watershed Key Pollution Sources.                                                                                                                                                              | LPA | ZJEPA                  | Z39 |
| 2014 | 9  | 28 | Z38              | The ceremony of signing strategic cooperation agreement by Zhejiang Environmental Monitoring Center and Quzhou City Environmental Protection Bureau was held in Quzhou.                                                                                                                        | MEA | ZEMC                   | Z40 |
| 2014 | 11 | 24 | Z36              | Implementation Plan on Eliminating Yellow Label Cars of Zhejiang Province, Management Approach of Motor Vehicle Environmental Protection Inspection Label of Zhejiang Province.                                                                                                                | LPA | ZJEPA<br>ZJPSB<br>ZJTB | Z41 |
| 2014 | 12 | 24 | Z36              | Zhejiang Environmental Protection Bureau, Development and Reform Commission perform work docking on the elimination of coal-fired boilers.                                                                                                                                                     | MEA | ZJEPA<br>ZJDRC         | Z42 |
| 2015 | 1  | 8  | Z29, Z31,<br>Y36 | Zhejiang Provincial Government held a forum for Puyang River Water Environment Management in Pujiang County. Vice Governor Xiong Jianping fully affirmed the work of Pujiang County, and proposed four specific                                                                                | PA  | ZJG                    | Z43 |

|      |   |    |     |                                                                                                                                                                                                                                                                                                                                                                                                                                                     |     |                                                        |     |
|------|---|----|-----|-----------------------------------------------------------------------------------------------------------------------------------------------------------------------------------------------------------------------------------------------------------------------------------------------------------------------------------------------------------------------------------------------------------------------------------------------------|-----|--------------------------------------------------------|-----|
|      |   |    |     | requirements on the next step of Puyang River water environment management work.                                                                                                                                                                                                                                                                                                                                                                    |     |                                                        |     |
| 2015 | 1 | 23 | Z37 | Assessment Approach for Implementation of Air Pollution Control Action Plan of Zhejiang Province (Trial).                                                                                                                                                                                                                                                                                                                                           | LPA | ZJG<br>ZJEPa                                           | Z44 |
| 2015 | 4 | 17 | Z38 | The ceremony of signing strategic cooperation agreement by Zhejiang Environmental Monitoring Center and Linhai City Environmental Protection Bureau was held in Linhai.                                                                                                                                                                                                                                                                             | MEA | ZEMC                                                   | Z45 |
| 2015 | 5 | 13 |     | Opinions of the General Office of the People's Government of Zhejiang Province on Strengthening the Implementation of Enforcement of Environmental Supervision Law.                                                                                                                                                                                                                                                                                 | LPA | ZJEPa                                                  | Z46 |
| 2015 | 6 | 3  | Z38 | The ceremony of signing strategic cooperation agreement by Zhejiang Environmental Monitoring Center and Jinhua City Environmental Protection Bureau was held in Jinhua.                                                                                                                                                                                                                                                                             | MEA | ZEMC                                                   | Z47 |
| 2016 | 3 | 3  | Y40 | Deputy Director of Zhejiang Environmental Protection Bureau, Wang Yimiao, led the Director of Department of Pollution Prevention and Control, Han Zhifu, Director of Department of Regulation Information, Zhang Fujian and relevant personnel to Zhejiang Environmental Monitoring Center to carry out research and guidance work.                                                                                                                 | PA  | ZJEPa director                                         | Z48 |
| 2016 | 5 | 17 | Y44 | Deputy Director of Zhejiang Environmental Protection Bureau, Yu Xuanling and his entourage went to Zhejiang Environmental Monitoring Center to carry out research and provide guidance on the prevention and control and early warning of air pollution and other related work. Deputy Director Yu Xuanling gave an important speech, and he fully affirmed the important role the Center plays in the atmospheric monitoring and forecasting work. | PA  | ZJEPa director                                         | Z49 |
| 2016 | 7 | 8  | Y43 | Deputy Director of Zhejiang Environmental Protection Bureau, Wang Yimiao hosted the Coordination Meeting for Water Environment Coordination Work for Lishimen Reservoir Water Source in Tiantai County.                                                                                                                                                                                                                                             | PA  | ZJEPa director<br>ZJEMLEC<br>director<br>ZEMC director | Z50 |
| 2016 | 7 | 13 | Y44 | Director of Zhejiang Environmental Protection Bureau, Fang Min and his entourage to the Fenghua Tengtou Village Atmospheric Environment Automatic Monitoring Station to carry out inspection and provide guidance on the construction and operation of Zhejiang Province atmosphere pollution three-dimensional monitoring network.                                                                                                                 | PA  | ZJEPa director                                         | Z51 |

|                                            |    |    |     |                                                                                                                                                                                                                                                                                                   |     |                |     |
|--------------------------------------------|----|----|-----|---------------------------------------------------------------------------------------------------------------------------------------------------------------------------------------------------------------------------------------------------------------------------------------------------|-----|----------------|-----|
| 2016                                       | 7  | 22 |     | Zhejiang Environmental Protection Bureau carried out research and developed the Blacklist Management Approach for Environmental Law Violations of Zhejiang Province (Trial).                                                                                                                      | LPA | ZJEPA          | Z52 |
| 2016                                       | 11 | 2  | Y44 | Party member of Zhejiang Environmental Protection Bureau and Captain of Law Enforcement Inspection Corps, Shan Jinyan led the corps leadership and persons in charge of relevant departments to Zhejiang Environmental Monitoring Center to conduct research on the relevant issues.              | PA  | ZJEPA director | Z53 |
| 2016                                       | 11 | 9  | Y46 | Zhejiang Environmental Protection Bureau carried out research and developed Double Random Sampling Method for Daily Environmental Pollution Control of Zhejiang Province (Trial) and Random Check List of Zhejiang Environmental Protection Bureaus (Trial).                                      | LPA | ZJEPA          | Z54 |
| 2016                                       | 11 | 11 | Y46 | Party Member and Chief Engineer of Zhejiang Environmental Protection Bureau, Zhu Liusha led Director Li Xiaowei, Deputy Director Wang Lei, and Researcher Xu Hong of Department of Regulation Information to Zhejiang Environmental Monitoring Center to carry out research and provide guidance. | PA  | ZJEPA director | Z55 |
| <b>Part E: Autonomous Actions in Anhui</b> |    |    |     |                                                                                                                                                                                                                                                                                                   |     |                |     |
| 1998                                       | 12 | 22 |     | Regulations on Prevention and Control of Water Pollution in Chaohu Lake Basin.                                                                                                                                                                                                                    | LPA | APC            | A1  |
| 2001                                       | 7  | 28 |     | Regulations on Environmental Protection of Drinking Water in Urban Areas in Anhui Province.                                                                                                                                                                                                       | LPA | APC            | A2  |
| 2005                                       | 3  | 17 |     | Approach of Standard Remediation and Management of Pollution Source Discharge Port in Anhui Province.                                                                                                                                                                                             | LPA | AHEPA          | A3  |
| 2005                                       | 5  | 25 | A3  | Environmental Protection Department of Anhui Province organized the province to carry out special action on remediation of illegal sewage enterprises to protect the public health and environmental protection.                                                                                  | MEA | AHEPA          | A4  |
| 2008                                       | 1  | 29 |     | Implementation of Programs and Methods for Energy Saving and Emission Reduction Statistics, Monitoring and Assessment of Anhui Province.                                                                                                                                                          | LPA | AHG            | A5  |
| 2008                                       | 2  | 10 |     | Regulations on Environmental Protection of Drinking Water in Urban Areas in Anhui Province.                                                                                                                                                                                                       | LPA | APC            | A6  |
| 2008                                       | 10 | 14 |     | Notice of the People's Government of Anhui Province on Strengthening the Work of Pollution Reduction.                                                                                                                                                                                             | LPA | AHG            | A7  |

|      |    |    |        |                                                                                                                                                                                                                                                                                                                                                                                                                                                                              |     |                |     |
|------|----|----|--------|------------------------------------------------------------------------------------------------------------------------------------------------------------------------------------------------------------------------------------------------------------------------------------------------------------------------------------------------------------------------------------------------------------------------------------------------------------------------------|-----|----------------|-----|
| 2009 | 6  | 3  | A2, A6 | The People's Government of Anhui Province held a site meeting for the construction of sewage treatment plants in towns along Yangtze River and Xin'anjiang River.                                                                                                                                                                                                                                                                                                            | PA  | AHG            | A8  |
| 2009 | 12 | 29 | A7     | Construction and Operation Assessment Method for Three Major Systems of Total Pollution Reduction of Anhui Province.                                                                                                                                                                                                                                                                                                                                                         | LPA | AHEPA          | A9  |
| 2010 | 5  | 25 |        | Regular Release of Non-Conforming Production Enterprises for Environmental Protection in Anhui Province.                                                                                                                                                                                                                                                                                                                                                                     | LPA | AHEPA          | A10 |
| 2010 | 8  | 25 | Y17    | Regulations of Anhui Province on Environmental Protection.                                                                                                                                                                                                                                                                                                                                                                                                                   | LPA | APC            | A11 |
| 2011 | 1  | 5  |        | Environmental Protection Department of Anhui Province carried out Huaihe River water pollution prevention work of 2011.                                                                                                                                                                                                                                                                                                                                                      | MEA | AHEPA          | A12 |
| 2012 | 2  | 17 | Y22    | Environmental Protection Plan for Undertaking Industrial Transfer Demonstration Zone of Wanjiang City Belt (2011-2015).                                                                                                                                                                                                                                                                                                                                                      | LPA | AHG<br>WJCB    | A13 |
| 2012 | 3  | 31 | Y23    | Assessment Method for Environmental Protection Target Responsibility of Anhui Province (Trial).                                                                                                                                                                                                                                                                                                                                                                              | LPA | AHG            | A14 |
| 2012 | 6  | 12 | Y25    | Deputy Director of Environmental Protection Department of Anhui Province Lin Hong led the relevant personnel of Department of the Science and Technology Monitoring of the Department and Anhui Provincial Environmental Monitoring Center Station to Hefei Environmental Monitoring Station to carry out a special investigation of the environmental monitoring work.                                                                                                      | PA  | AHEPA director | A15 |
| 2012 | 11 | 20 | Y25    | Deputy Director of Environmental Protection Department of Anhui Province, Lin Hong led Director of Xiaopu Station of Anhui Provincial Environmental Monitoring Station, Deputy Director of Department of the Science and Technology Monitoring, Shu Ninghong to Ma'anshan and Wuhu to carry out a special research of the implementation of the monitoring under new environmental air quality standards and standardized construction of environmental monitoring stations. | PA  | AHEPA director | A16 |
| 2013 | 2  | 4  | A13    | Implementation Plan to Strengthen the Environmental Protection Work of Chemical Industry Parks of Anhui Province.                                                                                                                                                                                                                                                                                                                                                            | LPA | AHEPA          | A17 |
| 2013 | 4  | 10 | Y25    | Deputy Director of Environmental Protection Department of Anhui Province Lin Hong led the relevant personnel of Department of Planning and Finance, Department of the Science and Technology Monitoring and Anhui Provincial Environmental Monitoring Station to Hefei Environmental Monitoring Station                                                                                                                                                                      | PA  | AHEPA director | A18 |

|      |    |    |                  |                                                                                                                                                                                                                                                                                                                                |     |                            |     |
|------|----|----|------------------|--------------------------------------------------------------------------------------------------------------------------------------------------------------------------------------------------------------------------------------------------------------------------------------------------------------------------------|-----|----------------------------|-----|
|      |    |    |                  | to check the construction progress of Anhui's first environmental air haze monitoring station.                                                                                                                                                                                                                                 |     |                            |     |
| 2013 | 5  | 14 | A9               | The teleconference of the advancing and coordination team for total emission reduction of pollutants in Anhui Province was held in Hefei.                                                                                                                                                                                      | PA  | AHEPA director<br>AH mayor | A19 |
| 2013 | 9  | 10 | A15, A16,<br>A18 | Anhui Environmental Monitoring Station developed the automatic monitoring inspection of environmental air of the whole province in 2013.                                                                                                                                                                                       | MEA | AHEPA                      | A20 |
| 2013 | 10 | 23 |                  | Automatic Monitoring Management Method of Environment Quality of Anhui.                                                                                                                                                                                                                                                        | LPA | AHEPA                      | A21 |
| 2013 | 11 | 3  | Y28              | Liu Qingqiang from Environmental Protection Department of Anhui Province went to Wangjiang and Anqing for investigation and direction.                                                                                                                                                                                         | PA  | AHEPA director             | A22 |
| 2013 | 12 | 27 | Y29              | Liu Qingqiang who is the inspector of Anhui Province went to Ma'anshan to supervise and inspect pollution and emission reduction. In the morning of the day, the inspection team hosted the report conference of pollution and emission reduction work of Ma'anshan City.                                                      | PA  | AHEPA director             | A23 |
| 2014 | 3  | 13 | A21              | Implementation Rules of Quality Management of Environmental Monitoring of Anhui Province.                                                                                                                                                                                                                                      | LPA | AHEPA                      | A24 |
| 2014 | 7  | 21 | A1               | Regulations of Water Pollution Prevention in the Watershed of Chaohu Lake.                                                                                                                                                                                                                                                     | LPA | APC                        | A25 |
| 2014 | 10 | 13 | A19              | Inspector Liu Qingqiang from Environmental Protection Department of Anhui Province visited Wuhu City and Xuancheng City to supervise and inspect the special actions of environmental protection and the work of reduction of emission and pollution.                                                                          | PA  | AHEPA director             | A26 |
| 2014 | 12 | 9  | A25              | Lin Hong who is the Deputy Director of Environmental Protection Department of Anhui Province visited Lujiang, Chaohu, Baohe District, etc., to check the implementation of the special capital project of prevention of water pollution in the watershed of Chaohu Lake, of which the progress was slow in the previous stage. | PA  | AHEPA director             | A27 |
| 2015 | 1  | 31 | Y30 Y32<br>Y34   | Regulations of Atmosphere Pollution Prevention and Control of Anhui Province.                                                                                                                                                                                                                                                  | LPA | APC                        | A28 |
| 2015 | 2  | 10 | A28, Y35         | Implementation Plan of Quality Inspection of Air Automatic Monitoring of Anhui Province in 2015.                                                                                                                                                                                                                               | LPA | AHEPA                      | A29 |
| 2015 | 2  | 25 | Y36              | Work Plan of Major Inspection of Environmental Protection of Anhui Province.                                                                                                                                                                                                                                                   | LPA | AHG                        | A30 |
| 2015 | 4  | 10 | A30              | Anhui Province started the special inspection of air quality monitoring of 2015.                                                                                                                                                                                                                                               | MEA | AHEPA                      | A31 |

|      |    |    |     |                                                                                                                                                                                                                                                                                |     |       |     |
|------|----|----|-----|--------------------------------------------------------------------------------------------------------------------------------------------------------------------------------------------------------------------------------------------------------------------------------|-----|-------|-----|
| 2015 | 10 | 26 | A30 | Environmental Protection Department of Anhui Province developed the comprehensive monitoring activity of environmental protection.                                                                                                                                             | MEA | AHEPA | A32 |
| 2015 | 12 | 29 | A30 | Work Plan for Water Pollution Prevention and Control in Anhui Province.                                                                                                                                                                                                        | LPA | AHG   | A33 |
| 2016 | 6  | 8  | A30 | Environmental Protection Department of Anhui Province developed the investigation and renovation of chemical industry enterprises.                                                                                                                                             | MEA | AHEPA | A34 |
| 2016 | 6  | 17 | A30 | Anhui Province developed the major inspection of environmental protection.                                                                                                                                                                                                     | MEA | AHEPA | A35 |
| 2016 | 11 | 4  | A35 | Anhui Province developed the special checks on the enforcement of environmental legislation of environmental protection of key industries in 2016, including sewage treatment of cities and towns, iron and steel enterprises, plate glass enterprises and cement enterprises. | MEA | AHEPA | A36 |

### Appendix 3: Actor list

| Abbreviations of actors                            | Full names of actors                                |
|----------------------------------------------------|-----------------------------------------------------|
| <b>Part A: Central Government and Party Actors</b> |                                                     |
| NPC                                                | National People's Congress                          |
| SC                                                 | State Council                                       |
| NDRC                                               | National Development and Reform Commission          |
| MOEP                                               | Ministry of Environmental Protection                |
| MOIT                                               | Ministry of Industry and Information Technology     |
| MOHURD                                             | Ministry of Housing and Urban-Rural Development     |
| MOF                                                | Ministry of Finance                                 |
| MOT                                                | Ministry of Transportation                          |
| MOLR                                               | Ministry of Land and Resources                      |
| MOST                                               | Ministry of Science and Technology                  |
| NEA                                                | National Energy Administration                      |
| CMA                                                | China Meteorological Administration                 |
| CBRC                                               | China Banking Regulatory Commission                 |
| CPC Politburo                                      | Politburo of Communist Party of China               |
| <b>Part B: BTH Actors</b>                          |                                                     |
| BTHAPCLG                                           | BTH Air Pollution Control Leading Group             |
| BPC                                                | Beijing People's Congress                           |
| BG                                                 | Beijing Municipal Government                        |
| BEPA                                               | Beijing Environmental Protection Bureau             |
| BEMC                                               | Beijing Environmental Monitoring Center             |
| BUMLEB                                             | Beijing Urban Management and Law Enforcement Bureau |
| BTMB                                               | Beijing Traffic Management Bureau                   |

|        |                                                        |
|--------|--------------------------------------------------------|
| BAB    | Beijing Agriculture Bureau                             |
| BSB    | Beijing Statistical Bureau                             |
| BDRC   | Beijing Development and Reform Commission              |
| BQSB   | Beijing Quality and Technology Supervision Bureau      |
| BEPSC  | Beijing Environmental Protection Supervision Corps     |
| BMVEMC | Beijing Motor Vehicle Emission Monitoring Center       |
| BPBG   | Beijing Public Bus Group                               |
| BPSB   | Beijing Public Security Bureau                         |
| BHURD  | Beijing Housing and Urban-Rural Development Commission |
| BFB    | Beijing Finance Bureau                                 |
| BEITC  | Beijing Economy and Information Technology Commission  |
| BAHPEH | Beijing Air Heavy Pollution Emergency Headquarter      |
| BCB    | Beijing Cityscape Bureau                               |
| BUMC   | Beijing Urban Management Commission                    |
| TPC    | Tianjin People's Congress                              |
| TG     | Tianjin Municipal Government                           |
| TEPA   | Tianjin Environmental Protection Bureau                |
| TFAH   | Tianjin Fresh Air Headquarter                          |
| TEPSC  | Tianjin Environmental Protection Supervision Corps     |
| TPSB   | Tianjin Public Security Bureau                         |
| TTC    | Tianjin Transportation Commission                      |
| TMVEMC | Tianjin Motor Vehicle Emission Monitoring Center       |
| HPC    | Hebei People's Congress                                |
| HP     | Hebei Provincial Government                            |
| HEPA   | Hebei Environmental Protection Bureau                  |
| HPDF   | Hebei Provincial Department of Financing               |
| HPSB   | Hebei Public Security Bureau                           |
| HPP    | Hebei Provincial Procuratorate                         |
| HPC    | Hebei Provincial Court                                 |
| HDEPA  | Handan Environmental Protection Bureau                 |
| HSEPA  | Hengshui Environmental Protection Bureau               |
| HMVEMC | Hebei Motor Vehicle Emission Monitoring Center         |
| BDEPA  | Baoding Environmental Protection Bureau                |
| LCEPA  | Luan County Environmental Protection Bureau            |
| TSEPA  | Tangshan Environmental Protection Bureau               |
| LFEP   | Langfang Environmental Protection Bureau               |
| SJZEPA | Shijiazhuang Environmental Protection Bureau           |
| SJZPSB | Shijiazhuang Public Security Bureau                    |
| ZJKEAP | Zhuangziakou Environmental Protection Bureau           |

|                           |                                                                                 |
|---------------------------|---------------------------------------------------------------------------------|
| HEPSALG                   | Hebei Environmental Protection Special Action Leading Group                     |
| HDTERLG                   | Hebei Double-Thirty Energy-Saving Emergency Response Leading Group              |
| Beijing mayor             | Beijing mayor                                                                   |
| Beijing Party secretary   | Beijing Party secretary                                                         |
| Tianjin mayor             | Tianjin mayor                                                                   |
| Tianjin Party secretary   | Tianjin Party secretary                                                         |
| HEPA director             | HEPA director                                                                   |
| HIIT director             | HIIT director (HIIT: Hebei Department of Industry and Information Technology)   |
| HPSB director             | HPSB director                                                                   |
| HHURD director            | HHURD director (HHURD: Hebei Department of Housing and Urban-Rural Development) |
| HT director               | HTB director (HT: Hebei Department of Transportation)                           |
| HMA director              | HMA director (HMA: Hebei Meteorological Administration)                         |
| <b>Part C: YRD Actors</b> |                                                                                 |
| YRDUECM                   | Yangtze River Delta Urban Economy Cooperation member                            |
| SPC                       | Shanghai People's Congress                                                      |
| SHG                       | Shanghai Municipal Government                                                   |
| SHEPA                     | Shanghai Environmental Protection Bureau                                        |
| SEMC                      | Shanghai Environmental Monitoring Center                                        |
| SHESSC                    | Shanghai Energy-Saving Supervision Center                                       |
| SHTB                      | Shanghai Transportation Bureau                                                  |
| SHAB                      | Shanghai Agriculture Bureau                                                     |
| SHQSB                     | Shanghai Quality and Technology Supervision Bureau                              |
| SHMA                      | Shanghai Meteorological Administration                                          |
| JPC                       | Jiangsu People's Congress                                                       |
| JSG                       | Jiangsu Provincial Government                                                   |
| JSEPA                     | Jiangsu Environmental Protection Bureau                                         |
| JSDRC                     | Jiangsu Development and Reform Commission                                       |
| JSFB                      | Jiangsu Department of Financing                                                 |
| JSETC                     | Jiangsu Economy and Trade Commission                                            |
| JSSTB                     | Jiangsu Department of Science and Technology                                    |
| JSPSB                     | Jiangsu Public Security Bureau                                                  |
| JSLRB                     | Jiangsu Department of Land Resources                                            |
| JSHURD                    | Jiangsu Department of Housing and Urban-Rural Development                       |
| JSTB                      | Jiangsu Department of Transportation                                            |
| JSAB                      | Jiangsu Department of Agriculture                                               |
| JSSCSLG                   | Jiangsu Province Social Credit System Construction Leading Group                |
| ZPC                       | Zhejiang People's Congress                                                      |
| ZJG                       | Zhejiang Provincial Government                                                  |
| ZJEPA                     | Zhejiang Environmental Protection Bureau                                        |

|                    |                                                                                      |
|--------------------|--------------------------------------------------------------------------------------|
| ZJPSB              | Zhejiang Public Security Bureau                                                      |
| ZJTB               | Zhejiang Department of Transportation                                                |
| ZJDRC              | Zhejiang Development and Reform Commission                                           |
| ZEMC               | Zhejiang Environmental Monitoring Center                                             |
| APC                | Anhui People's Congress                                                              |
| AHG                | Anhui Provincial Government                                                          |
| AHEPA              | Anhui Environmental Protection Bureau                                                |
| WJCB               | Wanjiang city belt to undertake industrial transfer demonstration area               |
| SH CPC Politburo   | Shanghai CPC Politburo                                                               |
| SH mayor           | Shanghai mayor                                                                       |
| WX mayor           | Wuxi mayor                                                                           |
| NB mayor           | Ningbo mayor                                                                         |
| ZS mayor           | Zhoushan mayor                                                                       |
| SZ mayor           | Suzhou mayor                                                                         |
| YZ mayor           | Yangzhou mayor                                                                       |
| HZ mayor           | Hangzhou mayor                                                                       |
| SX mayor           | Shaoxing mayor                                                                       |
| NJ mayor           | Nanjing mayor                                                                        |
| NT mayor           | Nantong mayor                                                                        |
| TZ mayor           | Taizhou mayor                                                                        |
| CZ mayor           | Changzhou mayor                                                                      |
| HZ mayor           | Huzhou mayor                                                                         |
| JX mayor           | Jiaying mayor                                                                        |
| ZJ mayor           | Zhenjiang mayor                                                                      |
| JS Party secretary | Jiangsu Provincial CPC secretary                                                     |
| ZJ Party secretary | Zhejiang Provincial CPC secretary                                                    |
| SH Party secretary | Shanghai CPC secretary                                                               |
| AH Party secretary | Anhui Provincial CPC secretary                                                       |
| JS governor        | Jiangsu governor                                                                     |
| ZJ governor        | Zhejiang governor                                                                    |
| AH governor        | Anhui governor                                                                       |
| ZJDRC director     | ZJDRC director (ZJDRC: Zhejiang Development and Reform Commission)                   |
| JSDRC director     | JSDRC director (JSDRC: Jiangsu Development and Reform Commission)                    |
| SHDRC director     | SHDRC director (SHDRC: Shanghai Development and Reform Commission)                   |
| SHEPA director     | SHEPA director                                                                       |
| SHEITC director    | SHEITC director (SHEITC: Shanghai Economy and Information Technology Commission)     |
| SHHURD director    | SHHURD director (SHHURD: Shanghai Department of Housing and Urban-Rural Development) |
| SHAB director      | SHAB director                                                                        |

|                                                                       |                                                                  |
|-----------------------------------------------------------------------|------------------------------------------------------------------|
| SHFB director                                                         | SHFB director (SHFB: Shanghai Finance Bureau)                    |
| SHPSB director                                                        | SHPSB director (SHPSB: Shanghai Public Security Bureau)          |
| SPC member                                                            | SPC member                                                       |
| SHMA director                                                         | SHMA director (SHMA: Shanghai Meteorological Administration)     |
| JSEPA director                                                        | JSEPA director (JSEPA: Jiangsu Environmental Protection Bureau)  |
| ZJEPA director                                                        | ZJEPA director (ZJEPA: Zhejiang Environmental Protection Bureau) |
| AHEPA director                                                        | AHEPA director (ANEPA: Anhui Environmental Protection Bureau)    |
| <b>Part D: Non-Governmental Actors (State-Owned Energy Companies)</b> |                                                                  |
| PetroChina                                                            | China National Petroleum Corporation                             |
| Sinopec                                                               | China Petroleum & Chemical Corporation                           |
| StateGrid                                                             | State Grid Corporation of China                                  |
| Huaneng                                                               | China Huaneng Group Company                                      |
| Datang                                                                | China Datang Group Company                                       |
| Huadian                                                               | China Huadian Group Company                                      |
| Zongdiantou                                                           | State Power Investment Corporation                               |
| Shenhua                                                               | China Shenhua Group Company                                      |
